# Supplementary material for: Small-molecule inhibitors, immune checkpoint inhibitors, and more: FDA-approved novel therapeutic drugs for solid tumors from 1991 to 2021
Source: Springer Nature journal article supplement (doi:10.1186/s13045-022-01362-9), 2022-10-08
Supplement: MOESM1 [file 23584080]

## Supplementary data: Table 1 – FDA-approved drugs

| Drug (brand name)                              | Sponsor              | Properties                                                                                                 | Indication                                                                                                    | Approval date | Review |
|------------------------------------------------|----------------------|------------------------------------------------------------------------------------------------------------|---------------------------------------------------------------------------------------------------------------|---------------|--------|
| <b>1991 New molecular entities = 28</b>        |                      |                                                                                                            |                                                                                                               |               |        |
| 1 Ondansetron HCl (Zofran)                     | Novartis             | 5-HT <sub>3</sub> receptor antagonist                                                                      | Nausea and vomiting caused by radiotherapy, anesthesia, surgery or cytotoxic chemotherapy drugs               | 01/04/1991    | P      |
| 2 Gallium nitrate (Ganite)                     | Chapter 7 Trustee    | Bone-resorption inhibitor                                                                                  | Hypercalcemia of malignancy                                                                                   | 01/17/1991    | P, O   |
| 3 Ramipril (Altace)                            | King Pharms          | Angiotensin-converting enzyme (ACE) inhibitor                                                              | Hypertension                                                                                                  | 01/28/1991    | S      |
| 4 Succimer (Chemet)                            | Recordati Rare       | Analog of dimercaprol, binds to heavy metals and forms a water-soluble complex                             | Poisoning by lead and other heavy metals                                                                      | 01/30/1991    | P, O   |
| 5 Etodolac (Lodine)                            | Wyeth Pharms         | Cyclooxygenase-2 (COX-2) inhibitor                                                                         | Osteoarthritis, rheumatoid arthritis and control acute pain                                                   | 01/31/1991    | S      |
| 6 Doxacurium chloride (Nuromax)                | AbbVie               | Neuromuscular-blocking drug or skeletal muscle relaxant                                                    | Adjunctively in anesthesia for endotracheal intubation or to facilitate mechanical ventilation                | 03/07/1991    | S      |
| 7 Fludarabine phosphate (Fludara)              | Genzyme Corp         | DNA synthesis inhibitor                                                                                    | B-cell chronic lymphocytic leukemia                                                                           | 04/18/1991    | P      |
| 8 Fosinopril sodium (Monopril)                 | Bristol-Myers Squibb | Angiotensin-converting enzyme (ACE) inhibitor                                                              | Hypertension                                                                                                  | 05/16/1991    | S      |
| 9 Benazepril HCl (Lotensin)                    | Validus Pharms       | Angiotensin-converting enzyme (ACE) inhibitor                                                              | Hypertension                                                                                                  | 06/25/1991    | S      |
| 10 Felodipine (Plendil)                        | AstraZeneca          | Voltage-gated L-type calcium channel stabilizer                                                            | Hypertension                                                                                                  | 07/25/1991    | S      |
| 11 Foscarnet sodium (Foscavir)                 | Clinigen Hlthcare    | Virus-specific DNA polymerase inhibitor                                                                    | Cytomegalovirus retinitis in patients with AIDS                                                               | 09/27/1991    | P      |
| 12 Didanosine (Videx)                          | Bristol-Myers Squibb | HIV-1 reverse transcriptase inhibitor                                                                      | HIV-1 infection                                                                                               | 10/09/1991    | P      |
| 13 Pentostatin (Nipent)                        | Hospira              | Purine analog, irreversible inhibitor of adenosine deaminase                                               | INF $\alpha$ -refractory hairy cell leukemia                                                                  | 10/11/1991    | P, O   |
| 14 Pravastatin sodium (Pravachol)              | Bristol-Myers Squibb | HMG CoA reductase inhibitor                                                                                | Hypercholesterolemia                                                                                          | 10/31/1991    | S      |
| 15 Ticlopidine HCl (Ticlid)                    | Roche Palo           | Adenosine diphosphate receptor inhibitor                                                                   | Prevention of strokes                                                                                         | 10/31/1991    | P      |
| 16 Pamidronate disodium (Aredia)               | Novartis             | Bone-resorption inhibitor                                                                                  | Hypercalcemia of malignancy                                                                                   | 10/31/1991    | P      |
| 17 Clarithromycin (Biaxin)                     | AbbVie               | Binds to 23s rRNA (with nucleotides in domains II and V) and inhibits the protein synthesis in bacteria    | Broad range of infections                                                                                     | 10/31/1991    | P      |
| 18 Azithromycin (Zithromax)                    | Pfizer               | Inhibits bacterial protein synthesis by binding to the 50S ribosomal subunit of the bacterial 70S ribosome | Bacterial infections                                                                                          | 11/01/1991    | P      |
| 19 Quinapril HCl (Accupril)                    | Pfizer Pharms        | Angiotensin-converting enzyme (ACE) inhibitor                                                              | Hypertension                                                                                                  | 11/19/1991    | S      |
| 20 Flumazenil (Romazicon)                      | Roche                | Imidazobenzodiazepine derivative and benzodiazepine receptor antagonist                                    | Reversal of the sedative effects of benzodiazepines                                                           | 12/20/1991    | P      |
| 21 Simvastatin (Zocor)                         | Organon              | HMG CoA reductase inhibitor                                                                                | Hyperlipidemia                                                                                                | 12/23/1991    | S      |
| 22 Cefprozil (Cefzil)                          | Corden Pharma        | $\beta$ -lactam antibiotic, inhibits bacterial cell wall synthesis by binding to specific PBPs             | Mild to moderate infections of upper/lower respiratory tract and uncomplicated skin/skin-structure infections | 12/23/1991    | S      |
| 23 Nabumetone (Relafen)                        | Smithkline Beecham   | Cyclooxygenase-1/2 (COX-1/2) inhibitor                                                                     | Osteoarthritis and rheumatoid arthritis                                                                       | 12/24/1991    | S      |
| 24 Histrelin acetate (Supprelin)               | Shire                | Gonadotropin-releasing hormone (GnRH) agonist                                                              | Children with central precocious puberty (CPP)                                                                | 12/24/1991    | P      |
| 25 Isosorbide mononitrate (Ismo)               | Promius Pharma       | Soluble guanylate cyclase stimulator                                                                       | Acute and chronic angina pectoris, hypertension, and myocardial infarction                                    | 12/30/1991    | S      |
| 26 Sertraline HCl (Zoloft)                     | Upjohn               | Serotonin reuptake inhibitor                                                                               | Major depressive disorder, obsessive-compulsive disorder, panic disorder, and social anxiety disorder         | 12/30/1991    | S      |
| 27 Enoxacin (Penetrex)                         | Sanofi               | Quinolone/fluoroquinolone antibiotic, inhibits bacterial DNA gyrase and topoisomerase IV                   | Urinary tract infections and gonorrhea                                                                        | 12/31/1991    | S      |
| 28 Loracarbef (Lorabid)                        | King Pharms          | $\beta$ -lactam antibiotic, inhibits bacterial cell wall synthesis by binding to specific PBPs             | Mild to moderate infections caused by susceptible strains of the designated microorganisms                    | 12/31/1991    | S      |
| <b>1991 Biologics license applications = 4</b> |                      |                                                                                                            |                                                                                                               |               |        |
| 1 Filgrastim (Neupogen)                        | Amgen                | Recombinant human granulocyte colony-stimulating factor (G-CSF)                                            | Severe neutropenia in patients with non-myeloid malignancies                                                  | 02/20/1991    | N/A    |
| 2 Sargramostim (Leukine)                       | Berlex Labs          | Recombinant human granulocyte macrophage colony-stimulating factor (GM-CSF)                                | Myeloid reconstitution after PBPC/bone marrow transplantation, or with NHL, ALL, HL                           | 03/05/1991    | O      |
| 3 Aiglucerase (Ceredase)                       | Genzyme              | Modified human $\beta$ -glucocerebrosidase enzyme                                                          | Type 1 Gaucher's disease                                                                                      | 04/05/1991    | O      |
| 4 Beractant (Survanta)                         | AbbVie               | Natural bovine pulmonary surfactant                                                                        | Respiratory distress syndrome in premature infants                                                            | 07/01/1991    | O      |

## Supplementary data: Table 1 – FDA-approved drugs (Continued)

| Drug (brand name)                               | Sponsor             | Properties                                                                                                      | Indication                                                                                                                                                                                          | Approval date | Review |
|-------------------------------------------------|---------------------|-----------------------------------------------------------------------------------------------------------------|-----------------------------------------------------------------------------------------------------------------------------------------------------------------------------------------------------|---------------|--------|
| <b>1992 New molecular entities = 26</b>         |                     |                                                                                                                 |                                                                                                                                                                                                     |               |        |
| 1 Mivacurium chloride (Mivacron)                | AbbVie              | Cholinergic receptor inhibitor                                                                                  | Adjunctively in anesthesia for endotracheal intubation or to facilitate mechanical ventilation                                                                                                      | 01/22/1992    | P      |
| 2 Temafloxacin HCl (Omniflox)                   | Abbott              | Fluoroquinolone antibiotic                                                                                      | Systemic bacterial infections                                                                                                                                                                       | 01/30/1992    | N/A    |
| 3 Lomefloxacin HCl (Maxaquin)                   | Pharmacia           | Fluoroquinolone antibiotic                                                                                      | Respiratory tract, genital, urinary, and skin infections                                                                                                                                            | 02/21/1992    | S      |
| 4 Finasteride (Proscar)                         | Merck & Co          | Steroid type II 5 $\alpha$ reductase inhibitor                                                                  | Benign prostatic hyperplasia                                                                                                                                                                        | 06/19/1992    | P      |
| 5 Zalcitabine (Hivid)                           | Roche               | Nucleoside analog, HIV-reverse transcriptase inhibitor                                                          | HIV infection                                                                                                                                                                                       | 06/19/1992    | P, O   |
| 6 Teniposide (Vumon)                            | HQ spclt Pharma     | Topoisomerase II inhibitor                                                                                      | Refractory childhood acute lymphoblastic leukemia                                                                                                                                                   | 07/14/1992    | P, O   |
| 7 Halofantrine HCl (Halfan)                     | GlaxoSmithKline     | Blood schizonticidal antimalarial agent, binds to haemoglobin degrading enzyme unique to the malarial parasites | Malaria                                                                                                                                                                                             | 07/24/1992    | P, O   |
| 8 Bisoprolol fumarate (Zebeta)                  | Teva                | Cardioselective $\beta$ 1-adrenergic blocking agent                                                             | Cardiovascular diseases such as hypertension, coronary heart disease, arrhythmias, ischemic heart diseases, and myocardial infarction after the acute event                                         | 07/31/1992    | S      |
| 9 Cefpodoxime proxetil (Vantin)                 | Pharmacia & Upjohn  | Inhibits bacterial cell wall synthesis by binding PBPs                                                          | Mild to moderate infections caused by susceptible strains of the designated microorganisms                                                                                                          | 08/07/1992    | S      |
| 10 Masoprocol (Actinex)                         | Univ AZ Cancer Ctr  | 5-lipoxygenase inhibitor                                                                                        | Actinic keratoses                                                                                                                                                                                   | 09/04/1992    | S      |
| 11 Itraconazole (Sporanox)                      | Janssen Pharms      | Inhibits the cytochrome P450-dependent synthesis of ergosterol                                                  | Fungal infections                                                                                                                                                                                   | 09/11/1992    | P      |
| 12 Desflurane (Suprane)                         | Baxter Hlthcare     | May act on the lipid matrix of the neuronal membrane                                                            | Induction and/or maintenance of anesthesia                                                                                                                                                          | 09/18/1992    | S      |
| 13 Oxaprozin (Daypro)                           | Pfizer              | Cyclooxygenase-1 (COX-1) inhibitor                                                                              | Rheumatoid arthritis, osteoarthritis, dysmenorrhea, and to alleviate moderate pain                                                                                                                  | 10/29/1992    | S      |
| 14 Sotalol HCl (Betapace)                       | Covis               | $\beta$ 1- and $\beta$ 2-adrenergic receptor inhibitor                                                          | Ventricular arrhythmias, symptomatic atrial fibrillation, and symptomatic atrial flutter                                                                                                            | 10/30/1992    | P, O   |
| 15 Gadoteridol (Prohance)                       | Bracco              | Gadolinium-based MRI contrast agent                                                                             | Imaging of central nervous system                                                                                                                                                                   | 11/16/1992    | S      |
| 16 Atovaquone (Mepron)                          | GlaxoSmithKline     | Cytochrome bc1 complex (Complex III) inhibitor                                                                  | <i>Pneumocystis carinii</i> pneumonia                                                                                                                                                               | 11/25/1992    | P, O   |
| 17 Desogestrel; Ethinyl estradiol (Desogen)     | Organon USA         | Progesterone receptor activator; derivative of the natural estrogen estradiol                                   | Contraception                                                                                                                                                                                       | 12/10/1992    | S      |
| 18 Zolpidem tartrate (Ambien)                   | Sanofi              | $\gamma$ -Aminobutyric-acid type A (GABA-A receptor) stimulator                                                 | Insomnia                                                                                                                                                                                            | 12/16/1992    | S      |
| 19 Rifabutin (Mycobutin)                        | Pfizer              | Bacterial RNA polymerase inhibitor                                                                              | Prophylaxis of disseminated MAC disease in patients with advanced HIV infection                                                                                                                     | 12/23/1992    | P, O   |
| 20 Sumatriptan succinate (Imitrex)              | GlaxoSmithKline     | 5-HT <sub>1B/D</sub> receptor agonist                                                                           | Reduction of vascular inflammation associated with migraines                                                                                                                                        | 12/28/1992    | P      |
| 21 Indium In-111 chloride (Indiclor)            | GE Healthcare       | Radioactive diagnostic agent                                                                                    | Radiolabeling Satumomab pentetide (OncoScint), Capromab pentetide (ProstaScint) and Ibritumomab tiuxetan (Zevalin)                                                                                  | 12/29/1992    | S      |
| 22 Paroxetine HCl (Paxil)                       | Apotex Technologies | Serotonin reuptake inhibitor                                                                                    | Major depressive disorder, obsessive-compulsive disorder, social anxiety disorder, panic disorder, posttraumatic stress disorder, generalized anxiety disorder, and premenstrual dysphoric disorder | 12/29/1992    | S      |
| 23 Paclitaxel (Taxol)                           | HQ Spclt Pharma     | Microtubule-stabilizing agent                                                                                   | Advanced ovarian cancer                                                                                                                                                                             | 12/29/1992    | P, O   |
| 24 Flosequinan (Manoplax)                       | Boots               | Potential Phosphodiesterase 3 (PDE3) inhibitor                                                                  | Heart failure                                                                                                                                                                                       | 12/30/1992    | N/A    |
| 25 Nedocromil sodium (Tilade)                   | King Pharms         | Mast cell stabilizer                                                                                            | Itching associated with allergic conjunctivitis                                                                                                                                                     | 12/30/1992    | S      |
| 26 Terbinafine HCl (Lamisil)                    | Novartis            | Inhibits squalene epoxidase-dependent ergosterol synthesis                                                      | Ringworm and fungal nail infections                                                                                                                                                                 | 12/30/1992    | S      |
| <b>1992 Biologics license applications = 2</b>  |                     |                                                                                                                 |                                                                                                                                                                                                     |               |        |
| 1 Aldesleukin (Proleukin)                       | Chiron              | Recombinant human interleukin-2                                                                                 | Metastatic renal cell carcinoma                                                                                                                                                                     | 05/05/1992    | O      |
| 2 Indium In-111 satumomab pentetide (OncoScint) | Cytogen             | TAG-72-specific radiolabeled mAb                                                                                | Imaging of colorectal or ovarian cancer                                                                                                                                                             | 12/29/1992    | O      |

## Supplementary data: Table 1 – FDA-approved drugs (Continued)

| Drug (brand name)                                 | Sponsor            | Properties                                                                                                                                               | Indication                                                                             | Approval date | Review |
|---------------------------------------------------|--------------------|----------------------------------------------------------------------------------------------------------------------------------------------------------|----------------------------------------------------------------------------------------|---------------|--------|
| <b>1993 New molecular entities = 24</b>           |                    |                                                                                                                                                          |                                                                                        |               |        |
| 1 Gadodiamide (Omniscan)                          | GE Healthcare      | Nonionic, low-osmolar gadolinium-based contrast agent                                                                                                    | Contrast-enhanced magnetic resonance imaging                                           | 01/08/1993    | S      |
| 2 Cladribine (Leustatin)                          | Janssen Pharms     | Adenosine deaminase inhibitor                                                                                                                            | Hairy cell leukemia and multiple sclerosis                                             | 02/26/1993    | S      |
| 3 Enoxaparin sodium (Lovenox)                     | Sanofi             | Antithrombin III activator                                                                                                                               | Deep vein thrombosis (DVT) and pulmonary embolism (PE)                                 | 03/29/1993    | P      |
| 4 Loratadine (Claritin)                           | Bayer              | Histamine H1 receptor antagonist                                                                                                                         | Allergic rhinitis and urticaria                                                        | 04/12/1993    | S      |
| 5 Strontium chloride Sr-89 (Metastron)            | Q Biomed           | A radiopharmaceutical that concentrates in the bone of invaded tumor                                                                                     | Bone metastasis of tumor induced pain                                                  | 06/18/1993    | P      |
| 6 Levomethadyl acetate HCl (Orlaam)               | Roxane             | μ-opioid receptor agonist                                                                                                                                | Opioid addiction                                                                       | 07/09/1993    | P, O   |
| 7 Felbamate (Felbatol)                            | Mylan Speciality   | Dicarbamate derivative, inhibition of voltage-sensitive sodium and calcium channels, modulation of NMDA receptors, and potentiation of GABA transmission | Epilepsy                                                                               | 07/29/1993    | P, O   |
| 8 Cisapride monohydrate (Propulsid)               | Janssen Pharms     | 5-HT <sub>4</sub> receptor agonist                                                                                                                       | Nocturnal heartburn due to gastroesophageal reflux disease                             | 07/29/1993    | S      |
| 9 Perflubron (Imagent)                            | Alliance Pharm     | Bromine-based particulate contrast agent                                                                                                                 | Magnetic resonance imaging, computed tomography, and sonography                        | 08/13/1993    | P      |
| 10 Torsemide (Demadex)                            | Mylan Speciality   | Pyridine-sulfonylurea type loop diuretic                                                                                                                 | Edema associated with congestive heart failure, renal disease, or hepatic disease      | 08/23/1993    | S      |
| 11 Tacrine HCl (Cognex)                           | Shionogi           | Parasympathomimetic, reversible cholinesterase inhibitor                                                                                                 | Mild to moderate dementia of the Alzheimer's type                                      | 09/09/1993    | P      |
| 12 Rimantadine HCl (Flumadine)                    | Sun Pharm          | M2 ion channel inhibitor                                                                                                                                 | Influenza virus A infection                                                            | 09/17/1993    | P      |
| 13 Lodoxamide tromethamine (Alomide)              | Novartis           | Mast cell stabilizer                                                                                                                                     | Vernal keratoconjunctivitis, vernal conjunctivitis, and vernal keratitis               | 09/23/1993    | S, O   |
| 14 Piperacillin sodium; Tazobactam sodium (Zosyn) | Wyeth Pharms       | Broad-spectrum ampicillin derived ureidopenicillin antibiotic; β-lactamase inhibitor                                                                     | Bacterial infections                                                                   | 10/22/1993    | S      |
| 15 Levocabastine HCl (Livostin)                   | Novartis           | Histamine H1-receptor antagonist                                                                                                                         | Allergic conjunctivitis                                                                | 11/10/1993    | P      |
| 16 Trimetrexate glucuronate (Neutrexin)           | Medimmune Oncology | Folate antagonist, dihydrofolate reductase inhibitor                                                                                                     | <i>Pneumocystis carinii</i> pneumonia                                                  | 12/17/1993    | P, O   |
| 17 Venlafaxine HCl (Effexor)                      | Wyeth Pharms       | Arylalkanolamine serotonin-norepinephrine reuptake inhibitor                                                                                             | Major depressive disorder                                                              | 12/28/1993    | S      |
| 18 Granisetron HCl (Kytril)                       | Roche              | 5-HT <sub>3</sub> receptor agonist                                                                                                                       | Chemotherapy-induced nausea                                                            | 12/29/1993    | S      |
| 19 Risperidone (Risperdal)                        | Janssen Pharms     | 5-HT <sub>2</sub> receptor and dopamine D2 receptor antagonist                                                                                           | Schizophrenia, bipolar mania, irritability associated with autistic disorder           | 12/29/1993    | P      |
| 20 Calcipotriene (Dovonex)                        | Leo Pharma         | Synthetic derivative of calcitriol, a form of vitamin D                                                                                                  | Psoriasis                                                                              | 12/29/1993    | S      |
| 21 Perindopril erbumine (Aceon)                   | Symplmed Pharms    | Angiotensin-converting enzyme (ACE) inhibitor                                                                                                            | Hypertension                                                                           | 12/30/1993    | S      |
| 22 Gabapentin (Neurontin)                         | Upjohn             | γ-Aminobutyric-acid (GABA) analog                                                                                                                        | Seizures                                                                               | 12/30/1993    | P      |
| 23 Fenofibrate (Lipidil)                          | AbbVie             | Peroxisome proliferator activated receptor α (PPARα) activator                                                                                           | Hyperlipidemia                                                                         | 12/31/1993    | S      |
| 24 Fluvastatin sodium (Lescol)                    | Novartis           | HMG CoA reductase inhibitor                                                                                                                              | Hypercholesterolemia and mixed dyslipidemia                                            | 12/31/1993    | S      |
| <b>1993 Biologics license applications = 4</b>    |                    |                                                                                                                                                          |                                                                                        |               |        |
| 1 Antihemophilic factor Recombinant (Kogenate FS) | Bayer              | Recombinant coagulation factor VIII                                                                                                                      | Hemophilia A, von Willebrand disease, and factor XIII deficiency                       | 02/25/1993    | O      |
| 2 Interferon beta-1b (Betaseron)                  | Bayer              | Recombinant human interferon β-1b                                                                                                                        | Relapsing multiple sclerosis                                                           | 07/23/1993    | O      |
| 3 Aprotinin (Trasylol)                            | Bayer              | Bovine pancreatic trypsin inhibitor                                                                                                                      | Prophylactic use to reduce perioperative blood loss and the need for blood transfusion | 12/29/1993    | P, O   |
| 4 Dornase alfa (Pulmozyme)                        | Genentech          | Recombinant human DNase I                                                                                                                                | Cystic fibrosis                                                                        | 12/30/1993    | O      |

## Supplementary data: Table 1 – FDA-approved drugs (Continued)

| Drug (brand name)                              | Sponsor              | Properties                                                                | Indication                                                                                                               | Approval date | Review |
|------------------------------------------------|----------------------|---------------------------------------------------------------------------|--------------------------------------------------------------------------------------------------------------------------|---------------|--------|
| <b>1994 New molecular entities = 20</b>        |                      |                                                                           |                                                                                                                          |               |        |
| 1 Salmeterol xinafoate (Serevent)              | GlaxoSmithKline      | β2-adrenergic agonist                                                     | Asthma, prevention of exercise-induced bronchospasm, maintenance treatment of chronic obstructive pulmonary disease      | 02/04/1994    | P      |
| 2 Budesonide (Rhinocort)                       | Astrazeneca          | Glucocorticoid                                                            | Asthma, the treatment of various skin disorders, allergic rhinitis and ulcerative colitis                                | 02/14/1994    | S      |
| 3 Rocuronium bromide (Zemuron)                 | Organon USA          | Neuromuscular blocker or muscle relaxant                                  | Adjunctively in anesthesia for endotracheal intubation or to facilitate mechanical ventilation                           | 03/17/1994    | S      |
| 4 Acrivastine; Pseudoephedrine HCl (Semprex-D) | Auxilium Pharms      | Histamine H1 receptor antagonist; α/β-adrenergic receptors agonist        | Seasonal allergic rhinitis                                                                                               | 03/25/1994    | S      |
| 5 Iobenguane sulfate I-131                     | Pharmalucence        | Radiopharmaceutical                                                       | Location of pheochromocytomas and neuroblastomas                                                                         | 03/25/1994    | P      |
| 6 Tacrolimus (Prograf)                         | Astellas             | Macrolide immunosuppressant produced by <i>Streptomyces tsukubaensis</i>  | Prophylaxis of organ rejection in patients receiving allogeneic liver transplants, kidney transplants, heart transplants | 04/08/1994    | P, O   |
| 7 Indium In-111 pentetreotide kit (Octreoscan) | Curium               | Radioactive diagnostic agent                                              | Location of metastatic neuroblastomas                                                                                    | 06/02/1994    | P      |
| 8 Stavudine (Zerit)                            | Bristol-Myers Squibb | HIV reverse transcriptase inhibitor                                       | HIV-1 infection                                                                                                          | 06/24/1994    | P      |
| 9 Famciclovir (Famvir)                         | Novartis             | Viral DNA polymerase inhibitor                                            | Recurrent episodes of orolabial or genital herpes in HIV-infected adults                                                 | 06/29/1994    | S      |
| 10 Cysteamine bitartrate (Cystagon)            | Mylan                | Cystine-depleting agent                                                   | Corneal cystine crystal accumulation in patients with cystinosis                                                         | 08/15/1994    | P, O   |
| 11 Fludeoxyglucose F-18                        | Downstate Clincl     | Positron emitting radiopharmaceutical                                     | Positron emission tomography (PET) imaging                                                                               | 08/19/1994    | P      |
| 12 Technetium Tc-99m bismate kit (Neurolite)   | Lantheus Medcl       | Radioactive diagnostic agent                                              | Localization of neuroendocrine tumors bearing somatostatin receptors                                                     | 11/23/1994    | S      |
| 13 Fluvoxamine maleate (Luvox)                 | Solvay               | Serotonin reuptake inhibitor                                              | Obsessive-compulsive disorder                                                                                            | 12/05/1994    | S      |
| 14 Dorzolamide HCl (Trusopt)                   | Merck & Co           | Carbonic anhydrase II (CA-II) inhibitor                                   | Elevated intraocular pressure in patients with ocular hypertension or open-angle glaucoma                                | 12/09/1994    | P      |
| 15 Nefazodone HCl (Serzone)                    | Bristol-Myers Squibb | 5-HT <sub>2</sub> receptor agonist                                        | Depression                                                                                                               | 12/22/1994    | S      |
| 16 Dalteparin sodium (Fragmin)                 | Pfizer               | Increasing the activity of antithrombin III (AT-III)                      | Thromboprophylaxis in general/abdominal surgery                                                                          | 12/22/1994    | S      |
| 17 Vinorelbine tartrate (Navelbine)            | Pierre Fabre         | Microtubule-destabilizing agent                                           | Non-small-cell lung cancer (NSCLC)                                                                                       | 12/23/1994    | P      |
| 18 Lamotrigine (Lamictal)                      | GlaxoSmithKline      | Presynaptic neuronal membranes stabilizer and glutamate release inhibitor | Epilepsy and bipolar disorder                                                                                            | 12/27/1994    | P      |
| 19 Spirapril HCl (Renormax)                    | Schering             | Angiotensin-converting enzyme (ACE) inhibitor                             | Hypertension                                                                                                             | 12/29/1994    | S      |
| 20 Rimexolone (Vexol)                          | Eyevance             | Glucocorticoid receptor agonist                                           | Eye inflammation caused by infections, injury, surgery, or other conditions                                              | 12/30/1994    | P      |
| <b>1994 Biologics license applications = 3</b> |                      |                                                                           |                                                                                                                          |               |        |
| 1 Pegaspargase (Oncaspar)                      | Sigma Tau            | <i>Escherichia coli</i> -derived L-asparaginase                           | Pediatric acute lymphoblastic leukaemia                                                                                  | 02/01/1994    | O      |
| 2 Imiglucerase (Cerezyme)                      | Genzyme              | Recombinant human β-glucocerebrosidase enzyme                             | Type 1 Gaucher's disease                                                                                                 | 05/23/1994    | O      |
| 3 Abciximab (Reopro)                           | Centocor             | anti-glycoprotein IIb/IIIa receptor mAb                                   | Prevention of cardiac ischemic complications in patients undergoing percutaneous coronary intervention                   | 12/22/1994    | N/A    |

## Supplementary data: Table 1 – FDA-approved drugs (Continued)

| Drug (brand name)                       | Sponsor            | Properties                                                                                                                             | Indication                                                                                                                                 | Approval date | Review |
|-----------------------------------------|--------------------|----------------------------------------------------------------------------------------------------------------------------------------|--------------------------------------------------------------------------------------------------------------------------------------------|---------------|--------|
| <b>1995 New molecular entities = 29</b> |                    |                                                                                                                                        |                                                                                                                                            |               |        |
| 1 Nisoldipine (Sular)                   | Covis              | Calcium channel antagonist                                                                                                             | Hypertension                                                                                                                               | 02/02/1995    | S      |
| 2 Tramadol HCl (Ultram)                 | Janssen Pharms     | μ-opioid receptor agonist                                                                                                              | Moderate to severe pain                                                                                                                    | 03/03/1995    | S      |
| 3 Metformin HCl (Glucophage)            | Emd Serono         | Decreasing glucose production by the liver                                                                                             | Type 2 diabetes                                                                                                                            | 03/03/1995    | P      |
| 4 Losartan potassium (Cozaar)           | Organon            | Angiotensin II receptor type 1 (AT1) antagonist                                                                                        | Hypertension                                                                                                                               | 04/14/1995    | S      |
| 5 Nalmefene HCl (Revex)                 | Eurohlth Intl Sarl | μ- and δ-opioid antagonist                                                                                                             | Reversal of opioid drug effects                                                                                                            | 04/17/1995    | S      |
| 6 Moexipril HCl (Univasc)               | UCB Inc            | Angiotensin-converting enzyme (ACE) inhibitor                                                                                          | Hypertension                                                                                                                               | 04/19/1995    | S      |
| 7 Mycophenolate mofetil (Cellcept)      | Roche Palo         | Inosine-5'-monophosphate dehydrogenase inhibitor                                                                                       | Prophylaxis of organ rejection in recipients of allogeneic kidney, heart, or liver transplants                                             | 05/03/1995    | P      |
| 8 Iopromide (Ultravist 150)             | Bayer              | Non-ionic X-ray contrast agent                                                                                                         | Angiography and computed tomography imaging                                                                                                | 05/10/1995    | S      |
| 9 Lansoprazole (Prevacid)               | Takeda             | Proton pump inhibitor                                                                                                                  | Acid-reflux disorders (GERD), peptic ulcer disease, <i>H. pylori</i> eradication, and prevention of gastrointestinal bleeds with NSAID use | 05/10/1995    | S      |
| 10 Dexrazoxane HCl (Zincard)            | Pfizer             | DNA topoisomerase II inhibitor and iron ions chelator                                                                                  | Doxorubicin-caused cardiomyopathy in patients with breast cancer                                                                           | 05/26/1995    | P, O   |
| 11 Sevoflurane (Ultane)                 | AbbVie             | Reduction in junctional conductance by decreasing gap junction channel opening times and increasing gap junction channel closing times | Induction and maintenance of general anesthesia                                                                                            | 06/07/1995    | S      |
| 12 Dirithromycin (Dynabac)              | Lilly Res Labs     | Inhibits bacterial protein synthesis by binding to the 50S ribosomal subunit of the bacterial 70S ribosome                             | Bacterial infections in respiratory system and skin                                                                                        | 06/19/1995    | S      |
| 13 Acarbose (Precose)                   | Bayer              | Pancreatic α-amylase and membrane-bound intestinal α-glucosidase hydrolase enzymes inhibitor                                           | Type 2 diabetes                                                                                                                            | 09/06/1995    | S      |
| 14 Azelaic acid (Azelex)                | Almirall           | May inhibit the cellular protein synthesis in bacteria                                                                                 | Mild to moderate inflammatory acne vulgaris                                                                                                | 09/13/1995    | S      |
| 15 Carvedilol (Coreg)                   | Woodward           | α1- and β-adrenergic receptor inhibitor                                                                                                | Mild to severe heart failure                                                                                                               | 09/14/1995    | S      |
| 16 Epoprostenol sodium (Flolan)         | GlaxoSmithKline    | Prostaglandin                                                                                                                          | Pulmonary arterial hypertension                                                                                                            | 09/20/1995    | P, O   |
| 17 Alendronate sodium (Fosamax)         | Merck & Co         | Osteoclast-mediated bone-resorption inhibitor                                                                                          | Postmenopausal osteoporosis                                                                                                                | 09/29/1995    | P      |
| 18 Bicalutamide (Casodex)               | Ani Pharms         | Androgen receptor antagonist                                                                                                           | Advanced prostate cancer                                                                                                                   | 10/04/1995    | S      |
| 19 Lamivudine (Epivir)                  | Viiv Hlthcare      | HIV reverse transcriptase inhibitor                                                                                                    | HIV-1 infection                                                                                                                            | 11/17/1995    | P      |
| 20 Glimepiride (Amaryl)                 | Sanofi             | Insulin secretagogue                                                                                                                   | Type 2 diabetes                                                                                                                            | 11/30/1995    | S      |
| 21 Saquinavir mesylate (Invirase)       | Roche              | HIV protease inhibitor                                                                                                                 | HIV-1 infection                                                                                                                            | 12/06/1995    | P      |
| 22 Cetirizine HCl (Zyrtec allergy)      | J&J                | Histamine H1 receptor antagonist                                                                                                       | Allergy symptoms                                                                                                                           | 12/08/1995    | S      |
| 23 Amifostine (Ethylol)                 | Clinigen           | Binds to and detoxifies cytotoxic platinum-containing metabolites of cisplatin                                                         | Cisplatin caused cumulative renal toxicity in patients with ovarian cancer                                                                 | 12/08/1995    | P, O   |
| 24 Riluzole (Rilutek)                   | Covis              | Glutamate antagonist                                                                                                                   | Amyotrophic lateral sclerosis                                                                                                              | 12/12/1995    | P, O   |
| 25 Cefbuten dihydrate (Cedax)           | SI Pharms          | Cephalosporin antibiotic, inhibits bacterial cell wall synthesis by binding to specific PBPs                                           | Chronic bronchitis, acute bacterial otitis media, pharyngitis, and tonsillitis                                                             | 12/20/1995    | S      |
| 26 Ioxilan (Oxilan-300)                 | Guerbet            | Non-ionic X-ray contrast agent                                                                                                         | Angiography, urography, and computed tomography imaging                                                                                    | 12/21/1995    | S      |
| 27 Porfimer sodium (Photofrin)          | Pinnacle Biologs   | A photosensitizer used for photodynamic therapy                                                                                        | Advanced esophageal cancer                                                                                                                 | 12/27/1995    | P, O   |
| 28 Anastrozole (Arimidex)               | Ani Pharms         | Aromatase inhibitor                                                                                                                    | Advanced breast cancer in post-menopausal women                                                                                            | 12/27/1995    | S      |
| 29 Ibutilide fumarate (Corvert)         | Pfizer             | Delays repolarization by activation of a slow, inward sodium current                                                                   | The rapid conversion of atrial fibrillation or atrial flutter of recent onset to sinus rhythm                                              | 12/28/1995    | S      |

## Supplementary data: Table 1 – FDA-approved drugs (Continued)

| Drug (brand name)                             | Sponsor              | Properties                                                                                            | Indication                                                                                                                                                          | Approval date | Review |
|-----------------------------------------------|----------------------|-------------------------------------------------------------------------------------------------------|---------------------------------------------------------------------------------------------------------------------------------------------------------------------|---------------|--------|
| <b>1996 New molecular entities = 51</b>       |                      |                                                                                                       |                                                                                                                                                                     |               |        |
| 1 Cefepime HCl (Maxipime)                     | Hospira              | Bacterial cell wall synthesis inhibitor                                                               | Pneumonia caused by <i>Streptococcus pneumoniae</i>                                                                                                                 | 01/18/1996    | S      |
| 2 Technetium Tc-99m tetrofosmin kit (Myoview) | Janssen Pharms       | Radioactive diagnostic agent                                                                          | Myocardial perfusion imaging for heart disease diagnosis                                                                                                            | 03/03/1995    | S      |
| 3 Ritonavir (Norvir)                          | AbbVie               | HIV protease inhibitor                                                                                | HIV-1 infection                                                                                                                                                     | 03/01/1996    | P      |
| 4 Indinavir sulfate (Crixivan)                | Merck & Co           | HIV protease inhibitor                                                                                | HIV-1 infection                                                                                                                                                     | 03/13/1996    | P      |
| 5 Iodixanol (Visipaque 270)                   | GE Healthcare        | Non-ionic X-ray contrast agent                                                                        | Angiocardiology                                                                                                                                                     | 03/22/1996    | S      |
| 6 Trandolapril (Mavik)                        | AbbVie               | Angiotensin-converting enzyme (ACE) inhibitor                                                         | Hypertension and left ventricular dysfunction                                                                                                                       | 04/26/1996    | S      |
| 7 Sodium phenylbutyrate (Buphenyl)            | Horizon Therap       | Pro-drug of phenylacetate, which conjugates with glutamine to form phenylacetylglutamine              | Urea cycle disorders                                                                                                                                                | 04/30/1996    | P, O   |
| 8 Docetaxel (Taxotere)                        | Sanofi               | Microtubule-stabilizing agent                                                                         | Locally advanced or metastatic breast cancer                                                                                                                        | 05/14/1996    | P      |
| 9 Gemcitabine HCl (Gemzar)                    | Eli Lilly            | DNA synthesis inhibitor                                                                               | Locally advanced or metastatic pancreatic cancer                                                                                                                    | 05/15/1996    | P      |
| 10 Topotecan HCl (Hycamtin)                   | Novartis             | DNA topoisomerases inhibitor                                                                          | Relapsed small cell lung cancer                                                                                                                                     | 05/28/1996    | P      |
| 11 Adapalene (Differin)                       | Galderma Labs        | Retinoid                                                                                              | Acne                                                                                                                                                                | 05/31/1996    | S      |
| 12 Latanoprost (Xalatan)                      | Upjohn               | Prostaglandin F2 $\alpha$ receptor agonist                                                            | Open-angle glaucoma or ocular hypertension                                                                                                                          | 06/05/1996    | P      |
| 13 Albendazole (Albenza)                      | Impax Labs           | Microtubule-destabilizing agent, binds to the colchicine-sensitive site of $\beta$ -tubulin           | Neurocysticercosis ( <i>Taenia solium tapeworm</i> ), Hydatid ( <i>Echinococcus tapeworm</i> )                                                                      | 06/11/1996    | P, O   |
| 14 Mirtazapine (Remeron)                      | Organon USA          | 5-HT <sub>2/3</sub> receptors antagonist; $\alpha$ 2 adrenergic auto- and hetero-receptors antagonist | Major depression                                                                                                                                                    | 06/14/1996    | S      |
| 15 Irinotecan HCl (Camptosar)                 | Pfizer               | Topoisomerase I inhibitor                                                                             | Metastatic colorectal cancer                                                                                                                                        | 06/14/1996    | P      |
| 16 Nevirapine (Viramune)                      | Boehringer Ingelheim | HIV reverse transcriptase inhibitor                                                                   | HIV-1 infection                                                                                                                                                     | 06/21/1996    | P      |
| 17 Meropenem (Merrem)                         | Pfizer               | Inhibits cell-wall synthesis by binding to PBPs                                                       | Bacterial meningitis caused by <i>Haemophilus influenzae</i> , <i>Neisseria meningitidis</i> and penicillin-susceptible isolates of <i>Streptococcus pneumoniae</i> | 06/21/1996    | S      |
| 18 Cidofovir (Vistide)                        | Gilead Sciences      | Viral DNA polymerase inhibitor                                                                        | Cytomegalovirus retinitis in patients with AIDS                                                                                                                     | 06/26/1996    | S      |
| 19 Remifentanyl HCl (Ultiva)                  | Mylan Institutional  | $\mu$ -opioid agonist                                                                                 | Adjunct to an anesthetic                                                                                                                                            | 07/12/1996    | S      |
| 20 Fexofenadine HCl (Allegra)                 | Chattem Sanofi       | Histamine H1 receptor antagonist                                                                      | Seasonal allergic rhinitis                                                                                                                                          | 07/25/1996    | S      |
| 21 Fosphenytoin sodium (Cerebyx)              | Parke Davis          | Voltage-dependent neuronal sodium channels inhibitor                                                  | Epilepsy                                                                                                                                                            | 08/05/1996    | S      |
| 22 Bentoquatam (Ivy block)                    | Stand Homeopath      | Physical shield against exposure to the irritating substance                                          | Protects skin from the plant oils                                                                                                                                   | 08/26/1996    | P      |
| 23 Ferumoxides (Feridex I.V.)                 | Amag Pharms          | Superparamagnetic iron oxide, MRI contrast agent                                                      | Enhances the T2 weighted imaging for liver lesions diagnosis                                                                                                        | 08/30/1996    | S      |
| 24 Midodrine HCl (Proamatine)                 | Takeda               | $\alpha$ 1-adrenergic receptor agonist                                                                | Orthostatic hypotension                                                                                                                                             | 09/06/1996    | P, O   |
| 25 Brimonidine tartrate (Alphagan)            | Allergan             | $\alpha$ 2-adrenergic receptor agonist                                                                | Open-angle glaucoma or ocular hypertension                                                                                                                          | 09/06/1996    | S      |
| 26 Urea C-13 (Breathtek UBT for H-pylori)     | Otsuka America       | <sup>13</sup> C labeled urea                                                                          | Initial diagnosis or post-treatment monitoring of <i>Helicobacter pylori</i> infection                                                                              | 09/17/1996    | S      |
| 27 Nilutamide (Nilandron)                     | Concordia            | Androgen receptor antagonist                                                                          | Metastatic prostate cancer                                                                                                                                          | 09/19/1996    | S      |
| 28 Ropivacaine HCl (Naropin)                  | Fresenius Kabi       | Blocks the sodium-channel and decreases chances of depolarization and consequent action potentials    | Local or regional anesthesia for surgery and acute pain management                                                                                                  | 09/24/1996    | S      |
| 29 Penciclovir (Denavir)                      | Mylan                | HSV DNA polymerase inhibitor                                                                          | Recurrent herpes labialis                                                                                                                                           | 09/24/1996    | S      |
| 30 Pentosan polysulfate sodium (Elmiron)      | Janssen Pharms       | FGF-1/2/4 antagonist                                                                                  | Bladder pain or discomfort caused by interstitial cystitis                                                                                                          | 09/26/1996    | S, O   |
| 31 Zafirlukast (Accolate)                     | Strides Pharma       | Leukotriene D4 and E4 receptor antagonist                                                             | Prophylaxis and chronic treatment of asthma                                                                                                                         | 09/26/1996    | S      |
| 32 Olanzapine (Zyprexa)                       | Lilly                | Dopamine D2 receptor antagonist                                                                       | Schizophrenia and bipolar disorder                                                                                                                                  | 09/30/1996    | S      |
| 33 Butenafin HCl (Mentax)                     | Mylan                | Squalene epoxidation inhibitor                                                                        | Pityriasis versicolor due to <i>M. furfur</i> ; Interdigital tinea pedis, tinea corporis and tinea cruris due to <i>E. floccosum</i>                                | 10/18/1996    | S      |
| 34 Betaine (Cystadane)                        | Recordati Rare       | Methyl group donor                                                                                    | Hypercytinemia                                                                                                                                                      | 10/25/1996    | P, O   |
| 35 Azelastine HCl (Astelin)                   | Mylan Spclt Viatris  | Histamine H1-receptor antagonis                                                                       | Seasonal allergic rhinitis                                                                                                                                          | 11/01/1996    | S      |
| 36 Ivermectin (Stromectol)                    | Merck & Co           | Glutamate-gated chloride ion channels activator                                                       | Head lice, onchocerciasis, and other worms                                                                                                                          | 11/22/1996    | P      |
| 37 Donepezil HCl (Aricept)                    | Eisai                | Acetylcholinesterase inhibitor                                                                        | Alzheimer's disease                                                                                                                                                 | 11/25/1996    | P      |
| 38 Tizanidine HCl (Zanaflex)                  | Covis                | $\alpha$ 2-adrenergic receptor agonist                                                                | Relieves the spasms and increased muscle tone caused by multiple sclerosis                                                                                          | 11/27/1996    | S, O   |
| 39 Ferumoxsil (Gastromark)                    | Amag Pharms          | MRI contrast agent                                                                                    | Enhanced MRI of bowel delineation                                                                                                                                   | 12/06/1996    | S      |
| 40 Zileuton (Zyflo)                           | Chiesi               | 5-lipoxygenase inhibitor                                                                              | Prophylaxis and chronic treatment of asthma                                                                                                                         | 12/09/1996    | S      |

## Supplementary data: Table 1 – FDA-approved drugs (Continued)

| Drug (brand name)                                                | Sponsor              | Properties                                                                                                             | Indication                                                                                     | Approval date | Review |
|------------------------------------------------------------------|----------------------|------------------------------------------------------------------------------------------------------------------------|------------------------------------------------------------------------------------------------|---------------|--------|
| <b>1996 New molecular entities = 51</b>                          |                      |                                                                                                                        |                                                                                                |               |        |
| 41 Amlexanox (Aphthasol)                                         | Uluru                | Inhibits the slow-reacting substance of anaphylaxis release, IL-3 antagonist                                           | Allergic asthma and rhinitis                                                                   | 12/17/1996    | P      |
| 42 Atorvastatin calcium (Lipitor)                                | Upjohn               | HMG CoA reductase inhibitor                                                                                            | Hyperlipidemia                                                                                 | 12/17/1996    | P      |
| 43 Miglitol (Glyset)                                             | Pfizer               | Membrane-bound intestinal $\alpha$ -glucoside hydrolase enzymes inhibitor                                              | Type 2 diabetes                                                                                | 12/18/1996    | S      |
| 44 Olopatadine HCl (Pataday twice daily relief)                  | Alcon Labs           | Histamine H1 antagonist                                                                                                | Itching associated with allergic conjunctivitis                                                | 12/18/1996    | S      |
| 45 Sparfloxacin (Zagam)                                          | Mylan                | Bacterial DNA gyrase inhibitor                                                                                         | Bacterial infections of the respiratory tract                                                  | 12/19/1996    | S      |
| 46 Fosfomycin tromethamine (Monurol)                             | Zambon SPA           | Phosphoenolpyruvate synthetase inhibitor                                                                               | Urinary tract infections (acute cystitis) caused by Escherichia coli and Enterococcus faecalis | 12/19/1996    | S      |
| 47 Glatiramer acetate (Copaxone)                                 | Teva                 | Binds to MHC and inhibits the T cell response to several myelin antigens                                               | Relapsing forms of multiple sclerosis                                                          | 12/20/1996    | S, O   |
| 48 Cabergoline (Dostinex)                                        | Pfizer               | Dopamine D2 receptor agonist                                                                                           | Hyperprolactinemia                                                                             | 12/23/1996    | S      |
| 49 Valsartan (Diovan)                                            | Novartis             | Angiotensin II receptor blocker                                                                                        | Hypertension                                                                                   | 12/23/1996    | S      |
| 50 Danaparoid sodium (Orgaran)                                   | Aspen Global         | Factor IIa (Thrombin) and factor Xa inhibitor                                                                          | Prophylaxis of post-operative deep vein thrombosis                                             | 12/24/1996    | S      |
| 51 Topiramate (Topamax)                                          | Janssen Pharms       | Voltage-dependent neuronal sodium channels inhibitor, GABA-A receptor stimulator, and APMA glutamate receptors blocker | Epilepsy                                                                                       | 12/24/1996    | S      |
| <b>1996 Biologics license applications = 9</b>                   |                      |                                                                                                                        |                                                                                                |               |        |
| 1 Respiratory syncytial virus immune globulin [human] (RespiGAM) | MedImmune            | Respiratory syncytial virus (RSV) immune globulin                                                                      | Prevention of respiratory syncytial virus (RSV) in high risk infants                           | 01/18/1996    | N/A    |
| 2 Interferon beta-1a (Avonex)                                    | Biogen               | Recombinant human interferon $\beta$ -1a                                                                               | Relapsing forms of multiple sclerosis                                                          | 05/17/1996    | O      |
| 3 Corticorelin ovine triflutate (Acthrel)                        | Ferring              | Synthetic human corticotropin-releasing hormone (hCRH)                                                                 | Pituitary and ectopic production of ACTH in patients with ACTH-dependent Cushing's syndrome    | 05/23/1996    | O      |
| 4 Insulin lispro recombinant (Humalog)                           | Eli Lilly            | Recombinant human insulin                                                                                              | Type 1 & 2 diabetes                                                                            | 06/14/1996    | N/A    |
| 5 Arcitumomab (CEA-Scan)                                         | Immunomedics         | $^{99m}\text{Tc}$ labelled anti-CEA mouse IgG1 (Fab)                                                                   | Recurrent colorectal cancer imaging                                                            | 06/28/1996    | O      |
| 6 Imciromab pentetate (Myoscint)                                 | Centocor             | $^{111}\text{In}$ labelled anti-myosin mouse IgG2a (Fab)                                                               | Cardiac imaging                                                                                | 07/03/1996    | N/A    |
| 7 Nofetumomab merpentan (Verluma)                                | Boehringer Ingelheim | $^{99m}\text{Tc}$ labelled anti-EpCAM (and/or CD20/MS4A1) mouse IgG2b (Fab)                                            | Small cell lung cancer imaging                                                                 | 8/20/1996     | N/A    |
| 8 Capromab pentetide (Prostascint)                               | Cytogen              | $^{111}\text{In}$ labelled anti-PSMA mouse mAb                                                                         | Diagnosis of metastatic prostate cancer                                                        | 10/28/1996    | N/A    |
| 9 Reteplase (Retavase)                                           | EKR Therap           | Recombinant plasminogen activator which catalyzes the cleavage of endogenous plasminogen to generate plasmin           | Myocardial infarction, ischemic stroke, and pulmonary emboli                                   | 10/30/1996    | N/A    |

## Supplementary data: Table 1 – FDA-approved drugs (Continued)

| Drug (brand name)                                    | Sponsor               | Properties                                                                                                                                     | Indication                                                                                                                                                   | Approval date | Review |
|------------------------------------------------------|-----------------------|------------------------------------------------------------------------------------------------------------------------------------------------|--------------------------------------------------------------------------------------------------------------------------------------------------------------|---------------|--------|
| <b>1997 New molecular entities = 36</b>              |                       |                                                                                                                                                |                                                                                                                                                              |               |        |
| 1 Troglitazone (Rezulin)                             | Pfizer                | PPAR $\gamma$ ligand                                                                                                                           | Type 2 diabetes                                                                                                                                              | 01/29/1997    | P      |
| 2 Imiquimod (Aldara)                                 | Bausch                | Toll-like receptor 7 agonist                                                                                                                   | External genital and perianal warts                                                                                                                          | 02/27/1997    | S      |
| 3 Tiludronate disodium (Skelid)                      | Sanofi                | Protein-tyrosine-phosphatase inhibitor and osteoclastic proton pump inhibitor                                                                  | Paget's disease of the bone                                                                                                                                  | 03/07/1997    | S      |
| 4 Anagrelide HCl (Agrylin)                           | Takeda                | Phosphodiesterase 3 (PDE3) and phospholipase A2 (PLA2) inhibitor                                                                               | Thrombocythemia, secondary to myeloproliferative neoplasms                                                                                                   | 12/06/1996    | S      |
| 5 Nelfinavir mesylate (Viracept)                     | Agouron Pharms        | HIV protease inhibitor                                                                                                                         | HIV-1 infection                                                                                                                                              | 03/14/1997    | P      |
| 6 Samarium Sm-153 lexidronam pentasodium (Quadramet) | Lantheus Medical      | <sup>153</sup> Sm labelled Radiopharmaceutical, chelator moiety associates with hydroxyapatite crystals concentrated in areas of bone turnover | Bone metastasis of tumor induced pain                                                                                                                        | 03/28/1997    | S      |
| 7 Delavirdine mesylate (Rescriptor)                  | Viiiv Hlthcare        | HIV reverse transcriptase inhibitor                                                                                                            | HIV-1 infection                                                                                                                                              | 04/04/1997    | P      |
| 8 Tamsulosin HCl (Flomax)                            | Sanofi                | $\alpha$ -adrenoceptor blocker                                                                                                                 | Benign prostatic hyperplasia                                                                                                                                 | 04/15/1997    | S      |
| 9 Urea, C-14 (Pytest)                                | Avent                 | <sup>14</sup> C labelled urea                                                                                                                  | Breath test for <i>Helicobacter pylori</i>                                                                                                                   | 05/09/1997    | P      |
| 10 Ardeparin sodium (Normiflo)                       | Pharmacia & Upjohn    | Low-molecular weight heparin                                                                                                                   | Prevention of deep venous thrombosis                                                                                                                         | 05/23/1997    | S      |
| 11 Toremifene citrate (Fareston)                     | Kyowa kirin           | Estrogen receptor (ER) inhibitor                                                                                                               | ER-positive metastatic breast cancer                                                                                                                         | 05/29/1997    | S, O   |
| 12 Tazarotene (Tazorac)                              | Allergan              | Prodrug of retinoid                                                                                                                            | Plaque psoriasis                                                                                                                                             | 06/13/1997    | S      |
| 13 Mibefradil 2HCl (Posicor)                         | Roche                 | Calcium channel blocker                                                                                                                        | Hypertension and chronic angina pectoris                                                                                                                     | 06/20/1997    | S      |
| 14 Cerivastatin sodium (Baycol)                      | Bayer                 | HMG CoA reductase inhibitor                                                                                                                    | Hyperlipidemia                                                                                                                                               | 06/26/1997    | S      |
| 15 Pramipexole 2HCl (Mirapex)                        | Boehringer Ingelheim  | Non-ergot dopamine agonist                                                                                                                     | Idiopathic Parkinson's disease                                                                                                                               | 07/01/1997    | S      |
| 16 Bromfenac sodium (Duract)                         | Wyeth Pharms          | Cyclooxygenase-2 (COX-2) inhibitor                                                                                                             | Acute pain following surgery                                                                                                                                 | 07/15/1997    | S      |
| 17 Letrozole (Femara)                                | Novartis              | Aromatase inhibitor                                                                                                                            | Advanced breast cancer                                                                                                                                       | 07/25/1997    | S      |
| 18 Dolasetron mesylate (Anzemet)                     | Validus Pharms        | 5-HT <sub>3</sub> receptor antagonist                                                                                                          | Chemotherapy-induced nausea and vomiting                                                                                                                     | 09/11/1997    | S      |
| 19 Arbutamine HCl (Genesa)                           | Gensia automedics     | $\alpha$ 1-adrenergic receptor agonist                                                                                                         | Adjunctive diagnosis of coronary artery disease                                                                                                              | 09/12/1997    | S      |
| 20 Ropinirole HCl (Requip)                           | GlaxoSmithKline       | Non-ergot dopamine agonist                                                                                                                     | Parkinson's disease                                                                                                                                          | 09/19/1997    | S      |
| 21 Fenoldopam mesylate (Corlopan)                    | Hospira               | Dopamine D1 receptor agonist                                                                                                                   | Hypertension                                                                                                                                                 | 09/23/1997    | S      |
| 22 Quetiapine fumarate (Seroquel)                    | AstraZeneca           | Dopamine D2 and 5-HT <sub>2A</sub> receptors antagonist                                                                                        | Bipolar disorder, schizophrenia, and major depressive disorder                                                                                               | 09/26/1997    | S      |
| 23 Tiagabine HCl (Gabitril)                          | Cephalon              | $\gamma$ -Aminobutyric-acid (GABA) reuptake inhibitor                                                                                          | Epilepsy                                                                                                                                                     | 09/30/1997    | S      |
| 24 Irbesartan (Avapro)                               | Sanofi                | Angiotensin II receptor blocker                                                                                                                | Hypertension                                                                                                                                                 | 09/30/1997    | S      |
| 25 Grepafloxacin HCl (Raxar)                         | Otsuka                | Bacterial topoisomerase II (DNA gyrase) and topoisomerase IV inhibitor                                                                         | Mild to moderate infections caused by <i>Haemophilus influenzae</i> , <i>Streptococcus pneumoniae</i> , or <i>Moraxella catarrhalis</i>                      | 11/06/1997    | S      |
| 26 Clopidogrel bisulfate (Plavix)                    | Sanofi                | Adenosine diphosphate inhibitor                                                                                                                | Prevents blood clots in peripheral vascular disease, coronary artery disease, and cerebrovascular disease                                                    | 11/17/1997    | S      |
| 27 Sibutramine HCl (Meridia)                         | Abbott                | Norepinephrine, serotonin and dopamine reuptake inhibitor                                                                                      | Obesity                                                                                                                                                      | 11/22/1997    | S      |
| 28 Zolmitriptan (Zomig)                              | IPR                   | 5-HT <sub>1B/D/F</sub> receptor agonist                                                                                                        | Migraine                                                                                                                                                     | 11/25/1997    | S      |
| 29 Mangafodipir trisodium (Teslascan)                | IC Targets            | MRI contrast agent                                                                                                                             | Imaging of liver lesions with suspected metastatic disease or hepatocellular carcinomas                                                                      | 11/26/1997    | S      |
| 30 Fomepizole (Antizol)                              | PAR Pharm             | Alcohol dehydrogenase inhibitor                                                                                                                | Antidote for ethylene glycol or methanol poisoning                                                                                                           | 12/04/1997    | S, O   |
| 31 Cefdinir (Omnicef)                                | AbbVie                | Cell wall synthesis inhibitor                                                                                                                  | Bacterial infections, including pneumonia, acute exacerbations of chronic bronchitis, acute maxillary sinusitis, pharyngitis/tonsillitis and skin infections | 12/04/1997    | S      |
| 32 Raloxifene HCl (Evista)                           | Eli Lilly             | Estrogen receptor modulator                                                                                                                    | Osteoporosis in postmenopausal women                                                                                                                         | 12/09/1997    | P      |
| 33 Trovafloxacin mesylate (Trovan)                   | Pfizer                | Bacterial topoisomerase II (DNA gyrase) and topoisomerase IV inhibitor                                                                         | Gonorrhea and chlamydia                                                                                                                                      | 12/18/1997    | S      |
| 34 Eprosartan mesylate (Teveten)                     | AbbVie                | Angiotensin II receptor antagonist                                                                                                             | Hypertension                                                                                                                                                 | 12/22/1997    | S      |
| 35 Repaglinide (Prandin)                             | Gemini Labs           | Insulin secretagogue                                                                                                                           | Type 2 diabetes                                                                                                                                              | 12/22/1997    | P      |
| 36 Emedastine difumarate (Emadine)                   | Novartis              | Histamine H1-receptor antagonist                                                                                                               | Allergic conjunctivitis                                                                                                                                      | 12/29/1997    | S      |
| <b>1997 Biologics license applications = 6</b>       |                       |                                                                                                                                                |                                                                                                                                                              |               |        |
| 1 Autologous cultured chondrocytes (Carticel)        | Genzyme Tissue Repair | Autologous cultured chondrocytes (Cell therapy)                                                                                                | Knee cartilage damage                                                                                                                                        | 08/22/1997    | N/A    |
| 2 Interferon alfacon-1 (Infergen)                    | Amgen                 | Recombinant human interferon                                                                                                                   | Hepatitis C virus infection                                                                                                                                  | 10/06/1997    | N/A    |
| 3 Oprelvekin (Neumega)                               | Genetics institute    | Recombinant human interleukin-11 (IL-11)                                                                                                       | Chemotherapy-induced thrombocytopenia                                                                                                                        | 11/25/1997    | N/A    |



## Supplementary data: Table 1 – FDA-approved drugs (Continued)

| Drug (brand name)                              | Sponsor        | Properties                                              | Indication                                                                   | Approval date | Review |
|------------------------------------------------|----------------|---------------------------------------------------------|------------------------------------------------------------------------------|---------------|--------|
| <b>1997</b> Biologics license applications = 6 |                |                                                         |                                                                              |               |        |
| 4 Rituximab (Rituxan)                          | Genentech      | CD20-directed mAb                                       | B-cell non-Hodgkin's lymphoma                                                | 11/26/1997    | O      |
| 5 Daclizumab (Zenapax)                         | Roche          | CD25 (IL-2 receptor)-directed mAb                       | Prophylaxis of acute organ rejection in patients receiving renal transplants | 12/10/1997    | N/A    |
| 6 Becaplermin (Regranex)                       | Smith & Nephew | Recombinant human platelet-derived growth factor (PDGF) | Ulcers caused by diabetic neuropathy                                         | 12/16/1997    | N/A    |

## Supplementary data: Table 1 – FDA-approved drugs (Continued)

| Drug (brand name)                                   | Sponsor                | Properties                                                                                                               | Indication                                                                                                                                | Approval date | Review |
|-----------------------------------------------------|------------------------|--------------------------------------------------------------------------------------------------------------------------|-------------------------------------------------------------------------------------------------------------------------------------------|---------------|--------|
| <b>1998 New molecular entities = 26</b>             |                        |                                                                                                                          |                                                                                                                                           |               |        |
| 1 Tolcapone (Tasmar)                                | Bausch                 | Catechol-O-methyltransferase inhibitor                                                                                   | Parkinson's disease                                                                                                                       | 01/29/1998    | S      |
| 2 Naratriptan HCl (Amerge)                          | GlaxoSmithKline        | 5-HT <sub>1B/D</sub> receptors agonist                                                                                   | Migraine headache                                                                                                                         | 02/10/1998    | S      |
| 3 Loteprednol etabonate (Lotemax)                   | Bausch & Lomb          | Corticosteroid                                                                                                           | Steroid responsive inflammatory condition of the eye                                                                                      | 03/09/1998    | S      |
| 4 Tolterodine tartrate (Detrol)                     | Upjohn                 | Muscarinic receptor antagonist                                                                                           | Overactive bladder with urinary incontinence, urgency, and frequency                                                                      | 03/25/1998    | S      |
| 5 Risedronate sodium (Actonel)                      | APIL                   | Farnesyl pyrophosphate synthase inhibitor                                                                                | Osteoporosis and Paget's disease of the bone                                                                                              | 03/27/1998    | S      |
| 6 Sildenafil citrate (Viagra)                       | Viatris                | Phosphodiesterase 5 (PDE5) inhibitor                                                                                     | Erectile dysfunction                                                                                                                      | 03/27/1998    | P      |
| 7 Brinzolamide (Azopt)                              | Novartis               | Carbonic anhydrase II inhibitor                                                                                          | Elevated intraocular pressure in patients with ocular hypertension or open-angle glaucoma                                                 | 04/01/1998    | S      |
| 8 Paricalcitol (Zemlar)                             | AbbVie                 | Synthetic vitamin D2 analog                                                                                              | Secondary hyperparathyroidism associated with chronic renal failure                                                                       | 04/17/1998    | S      |
| 9 Capecitabine (Xeloda)                             | Roche                  | Prodrug of 5-FU                                                                                                          | Metastatic breast cancer                                                                                                                  | 04/30/1998    | P      |
| 10 Tirofiban HCl (Aggrastat)                        | Medicure               | Platelet glycoprotein IIb/IIIa receptor antagonist                                                                       | Acute coronary syndrome                                                                                                                   | 05/14/1998    | P      |
| 11 Eptifibatid (Integrilin)                         | Schering               | Platelet glycoprotein IIb/IIIa receptor antagonist                                                                       | Acute coronary syndrome                                                                                                                   | 05/18/1998    | P      |
| 12 Candesartan cilexetil (Atacand)                  | Ani Pharms             | Angiotensin II receptor type 1 antagonist                                                                                | Hypertension                                                                                                                              | 06/04/1998    | S      |
| 13 Rifapentine (Priftin)                            | Sanofi                 | DNA-dependent RNA polymerase inhibitor                                                                                   | Active pulmonary tuberculosis caused by <i>Mycobacterium tuberculosis</i>                                                                 | 06/22/1998    | P, O   |
| 14 Rizatriptan benzoate (Maxalt)                    | Merck & Co             | 5-HT <sub>1B/D</sub> receptor agonist                                                                                    | Migraine headache                                                                                                                         | 06/29/1998    | S      |
| 15 Thalidomide (Thalomid)                           | Celgene                | Inhibition of TNF- $\alpha$ release from monocytes                                                                       | Erythema nodosum leprosum                                                                                                                 | 07/16/1998    | P, O   |
| 16 Citalopram HBr (Celexa)                          | Allergan               | Serotonin reuptake inhibitor                                                                                             | Major depression                                                                                                                          | 07/17/1998    | S      |
| 17 Fomivirsen sodium (Vitravene preservative free)  | Novartis               | Human cytomegalovirus replication inhibitor through an antisense mechanism                                               | Cytomegalovirus retinitis in patients with AIDS                                                                                           | 08/26/1998    | P      |
| 18 Leflunomide (Arava)                              | Sanofi                 | Pyrimidine synthesis inhibitor                                                                                           | Rheumatoid arthritis                                                                                                                      | 09/10/1998    | P      |
| 19 Technetium Tc-99m apcitide (Acutect)             | Cis Bio Intl           | <sup>99m</sup> Tc labelled radioactive diagnostic agent with platelet glycoprotein IIb/IIIa receptor binding             | Imaging of acute venous thrombosis in the lower extremities in patients with signs and symptoms of acute blood clots                      | 09/14/1998    | P      |
| 20 Efavirenz (Sustiva)                              | Bristol-Myers Squibb   | HIV reverse transcriptase inhibitor                                                                                      | HIV-1 infection                                                                                                                           | 09/17/1998    | P      |
| 21 Valrubicin (Valstar)                             | Endo Pharm             | A semisynthetic analog of anthracycline doxorubicin                                                                      | BCG-refractory CIS of urinary bladder cancer                                                                                              | 09/25/1998    | P, O   |
| 22 Sevelamer HCl (Renegel)                          | Genzyme                | Phosphate binder                                                                                                         | Hyperphosphatemia with chronic kidney disease                                                                                             | 10/30/1998    | S      |
| 23 Telmisartan (Micardis)                           | Boehringer Ingelheim   | Angiotensin II receptor antagonist                                                                                       | Hypertension                                                                                                                              | 11/10/1998    | S      |
| 24 Abacavir sulfate (Ziagen)                        | Viiiv Hlthcare         | HIV reverse transcriptase inhibitor                                                                                      | HIV infection                                                                                                                             | 12/17/1998    | P      |
| 25 Modafinil (Provigil)                             | Cephalon               | Indirect dopamine receptor agonist                                                                                       | Sleep apnea, narcolepsy, or shift work disorder                                                                                           | 12/24/1998    | S, O   |
| 26 Celecoxib (Celebrex)                             | Upjohn                 | Cyclooxygenase-2 (COX-2) inhibitor                                                                                       | Osteoarthritis and rheumatoid arthritis                                                                                                   | 12/31/1998    | P      |
| <b>1998 Biologics license applications = 10</b>     |                        |                                                                                                                          |                                                                                                                                           |               |        |
| 1 Lepirudin (Refludan)                              | Hoechst Marion Roussel | Protein-based direct thrombin inhibitor                                                                                  | Heparin-associated thrombocytopenia (type 2) and thromboembolic disease                                                                   | 03/06/1998    | P, O   |
| 2 Sacrosidase (Sucraid)                             | QOL Medcl              | Naturally-occurring gastrointestinal enzyme derived from baker's yeast ( <i>Saccharomyces cerevisiae</i> )               | Congenital sucrase-isomaltase deficiency                                                                                                  | 04/09/1998    | O      |
| 3 Basiliximab (Simulect)                            | Novartis               | CD25 (IL-2R $\alpha$ )-directed mAb                                                                                      | Acute rejection of renal transplant                                                                                                       | 05/12/1998    | P, O   |
| 4 Palivizumab (Synagis)                             | Medimmune              | Anti-F protein (Respiratory syncytial virus) mAb                                                                         | Respiratory syncytial virus infection                                                                                                     | 06/19/1998    | P      |
| 5 Calfactant (Infasurf preservative free)           | ONY                    | Modified natural bovine pulmonary surfactant                                                                             | Respiratory distress syndrome in premature infants                                                                                        | 07/01/1998    | O      |
| 6 Infliximab (Remicade)                             | Centocor               | Anti-TNF- $\alpha$ mAb                                                                                                   | Rheumatoid arthritis, Crohn's disease, and ankylosing spondylitis                                                                         | 08/24/1998    | O      |
| 7 Trastuzumab (Herceptin)                           | Genentech              | HER2-directed mAb                                                                                                        | HER2-positive breast cancer                                                                                                               | 09/25/1998    | P      |
| 8 Etanercept (Enbrel)                               | ImmuneX                | Dimeric fusion protein consisting of extracellular ligand-binding portion of TNFR linked to the Fc portion of human IgG1 | Rheumatoid arthritis                                                                                                                      | 11/02/1998    | P      |
| 9 Thyrotropin alfa (Thyrogen)                       | Genzyme                | Recombinant human thyroid stimulating hormone                                                                            | Diagnostic testing for thyroid tissue remnants following radioiodine ablation, and alongside radioactive agents to destroy thyroid tissue | 11/30/1998    | O      |
| 10 Anti-thymocyte globulin [Rabbit] (Thymoglobulin) | Genzyme                | Purified rabbit anti-thymocyte antibody                                                                                  | Acute rejection of renal transplant                                                                                                       | 12/30/1998    | S      |

## Supplementary data: Table 1 – FDA-approved drugs (Continued)

| Drug (brand name)                              | Sponsor              | Properties                                                                                                                  | Indication                                                                                                                                                                                                                    | Approval date | Review |
|------------------------------------------------|----------------------|-----------------------------------------------------------------------------------------------------------------------------|-------------------------------------------------------------------------------------------------------------------------------------------------------------------------------------------------------------------------------|---------------|--------|
| <b>1999 New molecular entities = 32</b>        |                      |                                                                                                                             |                                                                                                                                                                                                                               |               |        |
| 1 Cilostazol (Pletal)                          | Otsuka               | Phosphodiesterase 3 (PDE3) inhibitor                                                                                        | Intermittent claudication                                                                                                                                                                                                     | 01/15/1999    | S      |
| 2 Alitretinoin (Panretin)                      | Concordia            | 9-cis-retinoic acid, a form of vitamin A                                                                                    | AIDS-related Kaposi's sarcoma                                                                                                                                                                                                 | 02/02/1999    | P, O   |
| 3 Amprenavir (Agenerase)                       | GlaxoSmithKline      | HIV-1 protease inhibitor                                                                                                    | HIV infections                                                                                                                                                                                                                | 04/15/1999    | N/A    |
| 4 Orlistat (Xenical)                           | Cheplapharm          | Gastrointestinal lipase inhibitor                                                                                           | Obesity                                                                                                                                                                                                                       | 04/23/1999    | P      |
| 5 Rofecoxib (Vioxx)                            | Merck & Co           | Cyclooxygenase-2 (COX-2) inhibitor                                                                                          | Osteoarthritis, rheumatoid arthritis, and acute pain                                                                                                                                                                          | 05/20/1999    | P      |
| 6 Rosiglitazone maleate (Avandia)              | Woodward             | PPARs agonist                                                                                                               | Type 2 diabetes                                                                                                                                                                                                               | 05/25/1999    | P      |
| 7 Doxercalciferol (Hectorol)                   | Sanofi               | Synthetic vitamin D2 analog                                                                                                 | Secondary hyperparathyroidism in patients with chronic kidney disease                                                                                                                                                         | 06/09/1999    | S      |
| 8 Pioglitazone HCl (Actos)                     | Takeda               | PPAR $\gamma$ agonist                                                                                                       | Type 2 diabetes                                                                                                                                                                                                               | 07/15/1999    | P      |
| 9 Zanamivir (Relenza)                          | GlaxoSmithKline      | Neuraminidase inhibitor                                                                                                     | Influenza A and B virus infections                                                                                                                                                                                            | 07/26/1999    | P      |
| 10 Ganirelix acetate (Antagon)                 | Organon              | GnRH antagonist                                                                                                             | Inhibition of premature luteinizing hormone (LH) surges in women undergoing controlled ovarian hyperstimulation                                                                                                               | 05/18/1998    | P      |
| 11 Technetium Tc-99m depreotide (Neo tect kit) | Cis Bio Intl         | <sup>99m</sup> Tc labelled radioactive diagnostic agent                                                                     | Imaging of malignant lung tumors in patients with highly suspect for malignancy                                                                                                                                               | 08/03/1999    | P      |
| 12 Temozolomide (Temodar)                      | Merck & Co           | DNA alkylating agent                                                                                                        | Glioblastoma                                                                                                                                                                                                                  | 08/11/1999    | P, O   |
| 13 Zaleplon (Sonata)                           | Pfizer               | Benzodiazepine receptor agonist                                                                                             | Insomnia                                                                                                                                                                                                                      | 08/13/1999    | S      |
| 14 Rapacuronium bromide (Raplon)               | Organon              | Muscarinic acetylcholine receptor M2 antagonist                                                                             | Adjunctively in anesthesia for endotracheal intubation or to facilitate mechanical ventilation                                                                                                                                | 08/18/1999    | S      |
| 15 Rabeprazole sodium (Aciphex)                | Woodward             | Proton pump inhibitor                                                                                                       | Gastroesophageal reflux disease                                                                                                                                                                                               | 08/19/1999    | S      |
| 16 Sirolimus (Rapamune)                        | Merck & Co           | Mammalian target of rapamycin (mTOR) inhibitor                                                                              | Prophylaxis of organ rejection                                                                                                                                                                                                | 09/15/1999    | P, O   |
| 17 Epirubicin HCl (Ellence)                    | Pfizer               | DNA topoisomerase II inhibitor                                                                                              | Primary breast cancer with axillary node tumor involvement                                                                                                                                                                    | 09/15/1999    | P, O   |
| 18 Quinupristin; Dalfopristin (Synercid)       | King Pharms          | Inhibitor of early and late phase of protein synthesis in the bacterial ribosome                                            | Vancomycin-resistant <i>Enterococcus faecium</i> (VREF) bacteremia                                                                                                                                                            | 09/21/1999    | P      |
| 19 Pemirolast potassium (Alamast)              | Santen               | Mast cell stabilizer, Histamine H1-receptor antagonist                                                                      | Itching of the eye due to allergic conjunctivitis                                                                                                                                                                             | 09/24/1999    | P      |
| 20 Dofetilide (Tikosyn)                        | Pfizer               | Blockade of the cardiac ion channel carrying the rapid component of the delayed rectifier potassium current                 | Maintenance of normal sinus rhythm                                                                                                                                                                                            | 10/01/1999    | S      |
| 21 Entacapone (Comtan)                         | Orion Pharma         | Catechol-O-methyl transferase inhibitor                                                                                     | Parkinson's disease                                                                                                                                                                                                           | 10/19/1999    | S      |
| 22 Exemestane (Aromasin)                       | Pfizer               | Aromatase inhibitor                                                                                                         | ER-positive early breast cancer                                                                                                                                                                                               | 10/21/1999    | S, O   |
| 23 Oseltamivir Phosphate (Tamiflu)             | Roche                | Influenza virus neuraminidase inhibitor                                                                                     | Influenza A and B infections                                                                                                                                                                                                  | 10/27/1999    | P      |
| 24 Levetiracetam (Keppra)                      | UCB Inc              | Synaptic vesicle protein 2A (SV2A) stimulator                                                                               | Epilepsy                                                                                                                                                                                                                      | 11/30/1999    | S      |
| 25 Aminolevulinic acid HCl (Levulan)           | DUSA                 | Porphyrin precursor                                                                                                         | Actinic keratoses                                                                                                                                                                                                             | 12/03/1999    | S      |
| 26 Gadoversetamide (Optimark)                  | Liebel-Flarsheim     | Gadolinium-based MRI contrast agent                                                                                         | MRI tests of the brain, spine, and liver                                                                                                                                                                                      | 12/08/1999    | S      |
| 27 Mequinol; Tretinoin (Solage)                | Almirall             | Substrate of tyrosinase and acts as a competitive inhibitor of the formation of melanin precursors; All-trans retinoic acid | Solar lentigines                                                                                                                                                                                                              | 12/10/1999    | S      |
| 28 Moxifloxacin HCl (Avelox)                   | Bayer                | Topoisomerase II (DNA gyrase) and IV inhibitor                                                                              | Sinusitis, pneumonia, and secondary infections in chronic bronchitis                                                                                                                                                          | 12/10/1999    | S      |
| 29 Dexmedetomidine HCl (Precedex)              | Hospira              | $\alpha$ 2-adrenergic agonist                                                                                               | Sedation                                                                                                                                                                                                                      | 12/17/1999    | S, O   |
| 30 Gatifloxacin (Tequin)                       | Bristol-Myers Squibb | Topoisomerase II (DNA gyrase) and IV inhibitor                                                                              | Bronchitis, sinusitis, pneumonia, and skin infections caused by <i>S. pneumoniae</i> , <i>H. influenzae</i> , <i>S. aureus</i> , <i>M. pneumoniae</i> , <i>C. pneumoniae</i> , <i>L. pneumophila</i> , and <i>S. pyogenes</i> | 12/17/1999    | N/A    |
| 31 Nitric oxide (Inomax)                       | Mallinckrodt Hosp    | Guanylate cyclase activator                                                                                                 | Hypoxic respiratory failure in premature neonates                                                                                                                                                                             | 12/23/1999    | P, O   |
| 32 Bexarotene (Targretin)                      | Valeant Luxembourg   | Retinoid, ligand of retinoid X receptors (RXRs)                                                                             | Cutaneous T-cell lymphoma                                                                                                                                                                                                     | 12/29/1999    | P, O   |
| <b>1999 Biologics license applications = 2</b> |                      |                                                                                                                             |                                                                                                                                                                                                                               |               |        |
| 1 Denileukin diftitox (Ontak)                  | Eisai                | Fusion protein consisting of diphtheria toxin fragments and interleukin-2                                                   | Cutaneous T-cell lymphoma                                                                                                                                                                                                     | 02/05/1999    | O      |
| 2 Poractant alfa (Curosurf)                    | Chiesi USA           | Natural porcine lung surfactant                                                                                             | Respiratory distress syndrome in premature infants                                                                                                                                                                            | 11/18/1999    | O      |

## Supplementary data: Table 1 – FDA-approved drugs (Continued)

| Drug (brand name)                                                                                                            | Sponsor              | Properties                                                                                                                                                                       | Indication                                                                                                                     | Approval date | Review |
|------------------------------------------------------------------------------------------------------------------------------|----------------------|----------------------------------------------------------------------------------------------------------------------------------------------------------------------------------|--------------------------------------------------------------------------------------------------------------------------------|---------------|--------|
| <b>2000 New molecular entities = 24</b>                                                                                      |                      |                                                                                                                                                                                  |                                                                                                                                |               |        |
| 1 Cevimeline HCl (Evoxac)                                                                                                    | Daiichi Sankyo       | Cholinergic agonist                                                                                                                                                              | Sjogren's syndrome                                                                                                             | 01/11/2000    | S      |
| 2 Oxcarbazepine (Trileptal)                                                                                                  | Novartis             | Voltage-gated sodium channels inhibitor                                                                                                                                          | Epilepsy                                                                                                                       | 01/14/2000    | S      |
| 3 Pantoprazole sodium (Protonix)                                                                                             | Wyeth Pharms         | Proton pump inhibitor                                                                                                                                                            | Erosive esophagitis associated with gastroesophageal reflux disease                                                            | 02/02/2000    | S      |
| 4 Alosetron HCl (Lotronex)                                                                                                   | Sebela Ireland       | 5-HT <sub>3</sub> antagonist                                                                                                                                                     | Severe diarrhea-predominant irritable bowel syndrome (IBS) in women                                                            | 02/09/2000    | P      |
| 5 Perfluoropolyethylisopropyl ether; Polytetrafluoroethylene (Skin exposure reduction paste against chemical warfare agents) | US Army              | Skin exposure reduction paste against chemical warfare agents                                                                                                                    | Contact dermatitis, friction-induced blisters, calluses and foot ulceration                                                    | 02/17/2000    | P      |
| 6 Zonisamide (Zonegran)                                                                                                      | Concordia            | Sodium and voltage sensitive calcium channels inhibitor                                                                                                                          | Epilepsy                                                                                                                       | 03/27/2000    | S      |
| 7 Articaine HCl; Epinephrine bitartrate (Septocaine)                                                                         | Deproco              | Articaine is a sodium channels blocker; Epinephrine is vasoconstrictor to slow absorption into the general circulation and prolong maintenance of an active tissue concentration | Local, infiltrative, or conductive anesthesia                                                                                  | 04/03/2000    | S      |
| 8 Verteporfin (Visudyne)                                                                                                     | Valeant Luxembourg   | Generation of highly reactive, short-lived singlet oxygen and reactive oxygen radicals by light in the presence of oxygen                                                        | Pathological myopia, ocular histoplasmosis, and choroidal neovascularization in macular degeneration                           | 04/12/2000    | P      |
| 9 Meloxicam (Mobic)                                                                                                          | Boehringer Ingelheim | COX-2 inhibitor                                                                                                                                                                  | Osteoarthritis and rheumatoid arthritis                                                                                        | 04/13/2000    | S, O   |
| 10 Linezolid (Zyvox)                                                                                                         | Pfizer               | Binds to bacterial 23S ribosomal RNA of the 50S subunit and prevents the formation of 70S initiation complex                                                                     | Skin infections caused by <i>Staphylococcus aureus</i> , <i>Streptococcus pyogenes</i> , or <i>Streptococcus agalactiae</i>    | 04/18/2000    | P      |
| 11 Rivastigmine tartrate (Exelon)                                                                                            | Novartis             | Cholinesterase inhibitor                                                                                                                                                         | Mild-to-moderate Alzheimer's disease                                                                                           | 04/21/2000    | S      |
| 12 Colesevelam HCl (Welchol)                                                                                                 | Daiichi Sankyo       | Bile acid sequestrant                                                                                                                                                            | Hypercholesterolemia                                                                                                           | 05/26/2000    | S      |
| 13 Triptorelin pamoate (Trelstar)                                                                                            | Verity               | GnRH agonist                                                                                                                                                                     | Advanced prostate cancer                                                                                                       | 06/15/2000    | S      |
| 14 Argatroban                                                                                                                | Novartis             | Synthetic direct thrombin inhibitor derived from L-arginine                                                                                                                      | Thrombosis caused by heparin-induced thrombocytopenia                                                                          | 06/30/2000    | S      |
| 15 Tinzaparin sodium (Innohep)                                                                                               | Leo Pharma           | Low molecular weight heparin                                                                                                                                                     | Acute symptomatic deep vein thrombosis with or without pulmonary embolism                                                      | 08/19/1999    | S      |
| 16 Balsalazide disodium (Colazal)                                                                                            | Valeant Pharms       | Mechanism of action of is unknown                                                                                                                                                | Mild-to-moderate ulcerative colitis                                                                                            | 07/18/2000    | S      |
| 17 Docosanol (Abreva)                                                                                                        | GlaxoSmithKline      | Inhibiting fusion between the human cell plasma membrane and the herpes simplex virus (HSV) envelope                                                                             | Oral-facial herpes simplex episodes                                                                                            | 07/25/2000    | S      |
| 18 Unoprostone isopropyl (Rescula)                                                                                           | Sucampo Pharma       | Prostaglandin analog                                                                                                                                                             | Open-angle glaucoma or ocular hypertension                                                                                     | 08/03/2000    | P      |
| 19 Cetrorelix (Cetrotide)                                                                                                    | Emd Serono           | GnRH antagonist                                                                                                                                                                  | Inhibition of premature LH surges in women undergoing controlled ovarian stimulation                                           | 08/11/2000    | S      |
| 20 Lopinavir; Ritonavir (Kaletra)                                                                                            | Abbvie               | HIV protease inhibitors                                                                                                                                                          | HIV-1 infection                                                                                                                | 09/15/2000    | P      |
| 21 Arsenic trioxide (Trisenox)                                                                                               | Cephalon             | Degradation of PML-RAR $\alpha$ fusion protein                                                                                                                                   | Acute promyelocytic leukemia characterized by the presence of the t (15; 17) translocation or PML/RAR $\alpha$ gene expression | 09/25/2000    | P, O   |
| 22 Mifepristone (Mifeprex)                                                                                                   | Danco Labs           | Synthetic steroid, progestational and glucocorticoid hormone antagonist                                                                                                          | Cushing's syndrome                                                                                                             | 09/28/2000    | P      |
| 23 Bivalirudin (Angiomax)                                                                                                    | Sandoz               | Synthetic direct thrombin inhibitor                                                                                                                                              | Heparin-induced thrombocytopenia and for the prevention of thrombosis                                                          | 12/15/2000    | S      |
| 24 Nateglinide (Starlix)                                                                                                     | Novartis             | Insulin secretagogue                                                                                                                                                             | Insulin independent diabetes                                                                                                   | 12/22/2000    | S      |
| <b>2000 Biologics license applications = 6</b>                                                                               |                      |                                                                                                                                                                                  |                                                                                                                                |               |        |
| 1 Insulin glargine recombinant (Lantus)                                                                                      | Sanofi               | Recombinant human insulin [Gly (A21), Arg (B31, B32)]                                                                                                                            | Type 1 & 2 diabetes                                                                                                            | 04/20/2000    | N/A    |
| 2 Gemtuzumab ozogamicin (Mylotarg)                                                                                           | Wyeth Pharms         | CD33-directed antibody-drug conjugate (ADC)                                                                                                                                      | Relapsed or refractory CD33-positive acute myeloid leukemia (AML)                                                              | 05/17/2000    | O      |
| 3 Tenecteplase (Tnkase)                                                                                                      | Genentech            | Recombinant human tissue plasminogen activator                                                                                                                                   | Emergency treatment of myocardial infarction and pulmonary emboli                                                              | 06/02/2000    | N/A    |
| 4 Insulin aspart recombinant (Novolog)                                                                                       | Novo Nordisk         | Recombinant human insulin [Asp (B28)]                                                                                                                                            | Type 1 & 2 diabetes                                                                                                            | 06/07/2000    | N/A    |
| 5 Choriogonadotropin alfa (Ovidrel)                                                                                          | Emd Serono           | Recombinant human chorionic gonadotropin                                                                                                                                         | Female infertility                                                                                                             | 09/20/2000    | N/A    |
| 6 Botulinum toxin type B (Myobloc)                                                                                           | Elan Pharm           | Purified botulinum toxin type B                                                                                                                                                  | Cervical dystonia                                                                                                              | 12/08/2000    | O      |

## Supplementary data: Table 1 – FDA-approved drugs (Continued)

| Drug (brand name)                                 | Sponsor         | Properties                                                                                                          | Indication                                                                  | Approval date | Review |
|---------------------------------------------------|-----------------|---------------------------------------------------------------------------------------------------------------------|-----------------------------------------------------------------------------|---------------|--------|
| <b>2001 New molecular entities = 23</b>           |                 |                                                                                                                     |                                                                             |               |        |
| 1 Caspofungin acetate (Cancidas)                  | Merck & Co      | 1,3-β glucan synthase inhibitor                                                                                     | <i>Aspergillus</i> and <i>Candida</i> infection                             | 01/26/2001    | P      |
| 2 Ziprasidone HCl (Geodon)                        | Viartis         | 5-HT <sub>1D/2A</sub> receptor and dopamine D <sub>2</sub> receptor antagonist, 5-HT <sub>1A</sub> receptor agonist | Schizophrenia                                                               | 02/05/2001    | S      |
| 3 Formoterol fumarate (Foradil)                   | Novartis        | β <sub>2</sub> -adrenergic receptor agonist                                                                         | Asthma and chronic obstructive pulmonary disease (COPD)                     | 02/16/2001    | S      |
| 4 Galantamine HBr (Razadyne)                      | Janssen Pharms  | Acetylcholinesterase inhibitor                                                                                      | Alzheimer's disease                                                         | 02/28/2001    | S      |
| 5 Travoprost (Travatan)                           | Alcon Pharms    | Synthetic prostaglandin F <sub>2α</sub> analogt                                                                     | Open angle glaucoma or ocular hypertension                                  | 03/16/2001    | P      |
| 6 Bimatoprost (Lumigan)                           | Allergan        | Synthetic prostaglandin analog                                                                                      | Open angle glaucoma or ocular hypertension                                  | 03/16/2001    | P      |
| 7 Almotriptan malate (Axert)                      | Janssen Pharms  | 5-HT <sub>1B/D</sub> receptor agonist                                                                               | Acute migraine headaches                                                    | 05/07/2001    | S      |
| 8 Imatinib mesylate (Gleevec)                     | Novartis        | Tyrosine kinase inhibitor                                                                                           | Chronic myeloid leukemia                                                    | 05/10/2001    | P      |
| 9 Drospirenone; Ethinyl estradiol (Yasmin)        | Bayer           | Synthetic progestin and estrogen                                                                                    | Contraception                                                               | 05/11/2001    | S      |
| 10 Perflutren (Definity)                          | Lantheus Medcl  | Ultrasound contrast agent                                                                                           | Ultrasound contrast imaging in cardiology and radiology                     | 07/31/2001    | S      |
| 11 Zoledronic acid (Zometa)                       | Novartis        | Bone-resorption inhibitor                                                                                           | Hypercalcemia of malignancy                                                 | 08/20/2001    | P, O   |
| 12 Cefditoren pivoxil (Spectracef)                | Vansen Pharma   | Inhibition of cell wall synthesis                                                                                   | Chronic bronchitis, pneumonia, pharyngitis/tonsillitis, and skin infections | 08/29/2001    | S      |
| 13 Ethinyl estradiol; Etonogestrel (Nuvaring)     | Organon         | Synthetic estrogen; Synthetic derived progestin                                                                     | Contraception                                                               | 10/03/2001    | S      |
| 14 Tenofovir disoproxil fumarate (Viread)         | Gilead Sciences | HIV-1 and HBV reverse transcriptase inhibitor                                                                       | HIV-1 and HBV infection                                                     | 10/26/2001    | P      |
| 15 Frovatriptan succinate (Frova)                 | Endo Pharms     | 5-HT <sub>1B/1D</sub> receptor agonist                                                                              | Migraine headaches                                                          | 11/08/2001    | S      |
| 16 Valdecoxib (Bextra)                            | GD Searle       | Cyclooxygenase-2 (COX-2) inhibitor                                                                                  | Osteoarthritis and dysmenorrhea                                             | 11/16/2001    | S      |
| 17 Ethinyl estradiol; Norelgestromin (Ortho evra) | Janssen Pharms  | Synthetic estrogen and progestin                                                                                    | Contraception                                                               | 11/20/2001    | S      |
| 18 Bosentan (Tracleer)                            | Actelion        | Endothelin receptor antagonist                                                                                      | Pulmonary arterial hypertension                                             | 11/20/2001    | S, O   |
| 19 Dutasteride (Avodart)                          | Woodward        | 5α-reductase inhibitor                                                                                              | Benign prostatic hyperplasia                                                | 11/20/2001    | S      |
| 20 Ertapenem sodium (Invanz)                      | Merck & Co      | Inhibition of cell wall synthesis                                                                                   | Urinary tract infection                                                     | 11/21/2001    | S      |
| 21 Fondaparinux sodium (Arixtra)                  | Mylan Ireland   | Antithrombin III activator                                                                                          | Deep vein thrombosis (DVT)                                                  | 12/07/2001    | P      |
| 22 Pimecrolimus (Elidel)                          | Bausch          | Calcineurin inhibitor                                                                                               | Mild to moderate atopic dermatitis                                          | 12/13/2001    | S      |
| 23 Desloratadine (Clarinet)                       | Organon         | Histamine H <sub>1</sub> receptor antagonist                                                                        | Allergic rhinitis and chronic idiopathic urticaria                          | 12/21/2001    | S      |
| <b>2001 Biologics license applications = 5</b>    |                 |                                                                                                                     |                                                                             |               |        |
| 1 Peginterferon alfa-2B (Pegintron)               | Schering        | Purified human interferon                                                                                           | HCV infection                                                               | 01/19/2001    | O      |
| 2 Alemtuzumab (Campath)                           | Genzyme         | CD52-directed mAb                                                                                                   | B-cell chronic lymphocytic leukemia                                         | 05/07/2001    | O      |
| 3 Nesiritide recombinant (Natrecor)               | Scios           | Recombinant human B-type natriuretic peptide                                                                        | Acutely decompensated congestive heart failure                              | 08/10/2001    | S      |
| 4 Darbepoetin alfa (Aranesp)                      | Amgen           | Recombinant human erythropoietin                                                                                    | Anemia                                                                      | 09/17/2001    | N/A    |
| 5 Anakinra (Kineret)                              | Biovitrum       | Recombinant human interleukin-1 receptor antagonist                                                                 | Rheumatoid arthritis and neonatal-onset multisystem inflammatory disease    | 11/14/2001    | O      |

## Supplementary data: Table 1 – FDA-approved drugs (Continued)

| Drug (brand name)                              | Sponsor         | Properties                                                                                                                            | Indication                                                                                                                                                 | Approval date | Review |
|------------------------------------------------|-----------------|---------------------------------------------------------------------------------------------------------------------------------------|------------------------------------------------------------------------------------------------------------------------------------------------------------|---------------|--------|
| <b>2002 New molecular entities = 17</b>        |                 |                                                                                                                                       |                                                                                                                                                            |               |        |
| 1 Nitisinone (Orfadin)                         | Swedish Orphan  | 4-hydroxyphenyl-pyruvate dioxygenase inhibitor, involved in tyrosine catabolism                                                       | Hereditary tyrosinaemia type 1                                                                                                                             | 01/18/2002    | P, O   |
| 2 Olmesartan medoxomil (Benicar)               | Daiichi Sankyo  | Angiotensin II type 1 receptor antagonist                                                                                             | Hypertension                                                                                                                                               | 04/25/2002    | S      |
| 3 Fulvestrant (Faslodex)                       | AstraZeneca     | Estrogen receptor antagonist                                                                                                          | HR-positive metastatic breast cancer                                                                                                                       | 04/25/2002    | S      |
| 4 Treprostinil sodium (Remodulin)              | United Therap   | Prostacyclin analog, vasodilator and platelet-aggregation inhibitor                                                                   | Pulmonary arterial hypertension                                                                                                                            | 05/21/2002    | P, O   |
| 5 Voriconazole (Vfend)                         | Merck & Co      | Triazole, inhibitor of cytochrome P450-mediated 14 $\alpha$ -lanosterol demethylation                                                 | Invasive aspergillosis and serious fungal infections caused by <i>Scedosporium apiospermum</i> and <i>Fusarium spp</i>                                     | 05/24/2002    | S      |
| 6 Dimyristoyl lecithin; Perflhexane (Imagent)  | Vesselon SPV    | <i>n</i> -perfluorohexane (perflhexane) and non-animal semi-synthetic phospholipid (DMPC), increases ultrasound reflectivity of blood | Patients with suboptimal echocardiograms to opacify the left ventricular chamber and to improve the delineation of the left ventricular endocardial border | 05/31/2002    | S      |
| 7 Sodium oxybate (Xyrem)                       | Jazz            | $\gamma$ -hydroxybutyrate, central nervous system depressant                                                                          | Narcolepsy with episodes of cataplexy                                                                                                                      | 07/17/2002    | P, O   |
| 8 Tegaserod maleate (Zelnorm)                  | Alfasigma       | 5-HT <sub>4</sub> receptor agonist                                                                                                    | Irritable bowel syndrome                                                                                                                                   | 07/24/2002    | P      |
| 9 Oxaliplatin (Eloxatin)                       | Sanofi          | Organoplatinum alkylating agent, increases tumor response rate to chemotherapy                                                        | Colorectal cancer (in combination with 5-fluorouracil and leucovorin)                                                                                      | 08/09/2002    | P      |
| 10 Adefovir dipivoxil (Hepsera)                | Gilead Sciences | Acyclic nucleoside phosphonate, inhibitor of hepatitis B virus DNA polymerase                                                         | Chronic hepatitis B                                                                                                                                        | 09/20/2002    | P      |
| 11 Eplerenone (Inspra)                         | Upjohn          | Selective aldosterone receptor antagonist                                                                                             | Hypertension                                                                                                                                               | 09/27/2002    | N/A    |
| 12 Ezetimibe (Zetia)                           | Organon         | Inhibits intestinal cholesterol absorption, NPC1L1 blocker                                                                            | Primary hyperlipidemia and familial cholesterolemia                                                                                                        | 10/25/2002    | S      |
| 13 Aripiprazole (Abilify)                      | Otsuka          | Serotonin and dopamine receptors agonist                                                                                              | Schizophrenia                                                                                                                                              | 11/15/2002    | S, O   |
| 14 Nitazoxanide (Alinia)                       | Romark          | Antiprotozoal agent                                                                                                                   | Paediatric diarrhoea caused by <i>Cryptosporidium spp.</i> and <i>Giardia spp.</i>                                                                         | 11/22/2002    | P, O   |
| 15 Atomoxetine HCl (Strattera)                 | Eli Lilly       | Selective noradrenaline-reuptake inhibitor                                                                                            | Attention-deficit hyperactivity disorder                                                                                                                   | 11/26/2002    | S      |
| 16 Icodextrin (Extraneal)                      | Baxter Hlthcare | Isosmotic peritoneal dialysis solution containing glucose polymers                                                                    | Continuous ambulatory peritoneal dialysis of diabetic patients, automated peritoneal dialysis for the management of end-stage renal disease                | 12/20/2002    | S, O   |
| 17 Eletriptan HCl (Relpax)                     | Upjohn          | Selective 5-HT <sub>1B/D</sub> receptor agonist                                                                                       | Migraine                                                                                                                                                   | 12/26/2002    | S      |
| <b>2002 Biologics license applications = 4</b> |                 |                                                                                                                                       |                                                                                                                                                            |               |        |
| 1 Pegfilgrastim (Neulasta)                     | Amgen           | PEGylated form of recombinant human granulocyte colony-stimulating factor (G-CSF)                                                     | Febrile neutropenia or myelosuppressive chemotherapy-induced neutropenia                                                                                   | 01/31/2002    | N/A    |
| 2 Ibritumomab tiuxetan (Zevalin)               | IDEC Pharms     | <sup>111</sup> In and <sup>90</sup> Y labelled CD20-specific radiotherapeutic mAb                                                     | B-cell non-Hodgkin's lymphoma                                                                                                                              | 02/19/2002    | O      |
| 3 Peginterferon alfa-2A (Pegasys)              | Roche           | Recombinant human interferon                                                                                                          | Hepatitis B and C virus infection                                                                                                                          | 10/16/2002    | N/A    |
| 4 Adalimumab (Humira)                          | AbbVie          | TNF $\alpha$ -directed mAb                                                                                                            | Rheumatoid arthritis, Crohn's disease, and ankylosing spondylitis                                                                                          | 12/31/2002    | O      |

## Supplementary data: Table 1 – FDA-approved drugs (Continued)

| Drug (brand name)                                            | Sponsor              | Properties                                                                | Indication                                                                                                                                                        | Approval date | Review |
|--------------------------------------------------------------|----------------------|---------------------------------------------------------------------------|-------------------------------------------------------------------------------------------------------------------------------------------------------------------|---------------|--------|
| <b>2003 New molecular entities = 20</b>                      |                      |                                                                           |                                                                                                                                                                   |               |        |
| 1 Enfuvirtide (Fuzeon)                                       | Roche                | HIV-1 gp41 fusion inhibitor                                               | HIV-1 infection                                                                                                                                                   | 03/13/2003    | P      |
| 2 Aprepitant (Emend)                                         | Merck & Co           | NK1 receptor antagonist                                                   | Chemotherapy-induced nausea                                                                                                                                       | 03/26/2003    | P      |
| 3 Gemifloxacin mesylate (Factive)                            | LG Chem              | Bacterial topoisomerase II (DNA gyrase) and topoisomerase IV inhibitor    | Bacterial infections, including <i>S. pneumoniae</i> , <i>H. influenzae</i> , <i>H. parainfluenzae</i> , or <i>M. catarrhalis</i> , <i>S. pneumoniae</i> , et al. | 04/04/2003    | S      |
| 4 Gefitinib (Iressa)                                         | AstraZeneca          | EGFR kinase inhibitor                                                     | Non-small-cell lung cancer                                                                                                                                        | 05/05/2003    | P      |
| 5 Bortezomib (Velcade)                                       | Takeda Pharms        | Proteasome inhibitor                                                      | Multiple myeloma                                                                                                                                                  | 05/13/2003    | P, O   |
| 6 Ibandronate sodium (Boniva)                                | Roche                | Bisphosphonate                                                            | Osteoporosis                                                                                                                                                      | 05/16/2003    | S      |
| 7 Alfuzosin HCl (Uroxatral)                                  | Concordia            | $\alpha$ 1-adrenoceptor antagonist                                        | Benign prostate hyperplasia                                                                                                                                       | 06/12/2003    | S      |
| 8 Atazanavir sulfate (Reyataz)                               | Bristol-Myers Squibb | HIV protease inhibitor                                                    | HIV-1 infection                                                                                                                                                   | 06/20/2003    | P      |
| 9 Emtricitabine (Emtriva)                                    | Gilead Sciences      | HIV reverse transcriptase inhibitor                                       | HIV-1 infection                                                                                                                                                   | 07/02/2003    | S      |
| 10 Palonosetron HCl (Aloxi)                                  | Helsinn              | 5-HT <sub>3</sub> receptor antagonist                                     | Chemotherapy-induced nausea                                                                                                                                       | 07/25/2003    | S      |
| 11 Miglustat (Zavesca)                                       | Actelion             | Glucosylceramide synthase inhibitor                                       | Gaucher's disease                                                                                                                                                 | 07/31/2003    | S, O   |
| 12 Rosuvastatin calcium (Crestor)                            | IPR                  | HMG CoA reductase inhibitor                                               | Hypercholesterolemia                                                                                                                                              | 08/12/2003    | S      |
| 13 Vardenafil HCl (Levitra)                                  | Bayer                | Phosphodiesterase 5 (PDE5) inhibitor                                      | Erectile dysfunction                                                                                                                                              | 08/19/2003    | S      |
| 14 Daptomycin (Cubicin)                                      | Cubist Pharms        | Cyclic lipopeptide, cell membrane/wall constituent biosynthesis inhibitor | Skin infections, or bloodstream infections caused by <i>Staphylococcus aureus</i>                                                                                 | 09/12/2003    | P      |
| 15 Ferric hexacyanoferrate II (Radiogardase [Prussian blue]) | Heyl Chemisch        | Metal-binding complex                                                     | Systemic contamination with radioactive cesium and/or radioactive or non-radioactive thallium                                                                     | 10/02/2003    | P, O   |
| 16 Memantine HCl (Namenda)                                   | Allergan             | NMDA receptor antagonist                                                  | Alzheimer's disease                                                                                                                                               | 10/16/2003    | S      |
| 17 Epinastine HCl (Elestat)                                  | Allergan             | Histamine H1-receptor antagonist                                          | Hay fever                                                                                                                                                         | 10/16/2003    | S      |
| 18 Tadalafil (Cialis)                                        | Lilly                | Phosphodiesterase 5 (PDE5) inhibitor                                      | Erectile dysfunction                                                                                                                                              | 11/21/2003    | S      |
| 19 Abarelix (Plenaxis)                                       | Speciality European  | GnRH receptor antagonist                                                  | Advanced prostate cancer                                                                                                                                          | 11/25/2003    | P      |
| 20 Sertaconazole nitrate (Ertaczo)                           | Bausch               | Imidazole-derivative antifungal                                           | Tinea pedis                                                                                                                                                       | 12/10/2003    | S      |
| <b>2003 Biologics license applications = 8</b>               |                      |                                                                           |                                                                                                                                                                   |               |        |
| 1 Alefacept (Amevive)                                        | Biogen               | CD2-directed mAb                                                          | Psoriasis                                                                                                                                                         | 01/31/2003    | N/A    |
| 2 Pegvisomant (Somavert)                                     | Pharmacia            | Growth hormone receptor antagonist                                        | Acromegaly                                                                                                                                                        | 03/25/2003    | O      |
| 3 Desirudin recombinant (Iprivask)                           | Bausch               | Direct human thrombin inhibitor                                           | Prophylaxis of deep vein thrombosis for patients undergoing hip replacement surgery                                                                               | 04/04/2003    | N/A    |
| 4 Agalsidase beta (Fabrazyme)                                | Genzyme              | Recombinant human $\alpha$ -galactosidase A                               | Fabry disease                                                                                                                                                     | 04/24/2003    | O      |
| 5 Laronidase (Aldurazyme)                                    | Biomarin             | Recombinant $\alpha$ -L-iduronidase                                       | Mucopolysaccharidosis type 1                                                                                                                                      | 04/30/2003    | O      |
| 6 Omalizumab (Xolair)                                        | Genentech            | IgE-directed mAb                                                          | Asthma                                                                                                                                                            | 06/20/2003    | N/A    |
| 7 Tositumomab and iodine I-131 tositumomab (Bexxar)          | Corixa               | CD20-directed radiotherapeutic mAb                                        | Non-Hodgkin's lymphoma                                                                                                                                            | 06/30/2003    | P, O   |
| 8 Efalizumab (Raptiva)                                       | Genentech            | CD11a-directed mAb                                                        | Psoriasis                                                                                                                                                         | 10/27/2003    | N/A    |

## Supplementary data: Table 1 – FDA-approved drugs (Continued)

| Drug (brand name)                              | Sponsor              | Properties                                                                     | Indication                                                                      | Approval date | Review |
|------------------------------------------------|----------------------|--------------------------------------------------------------------------------|---------------------------------------------------------------------------------|---------------|--------|
| <b>2004 New molecular entities = 28</b>        |                      |                                                                                |                                                                                 |               |        |
| 1 Tiotropium bromide (Spiriva)                 | Boehringer Ingelheim | Muscarinic M1/5 receptors antagonist                                           | Chronic obstructive pulmonary disease (COPD)                                    | 01/30/2004    | S      |
| 2 Pemetrexed disodium (Alimta)                 | Eli Lilly            | Folate analog                                                                  | Malignant pleural mesothelioma                                                  | 02/04/2004    | P, O   |
| 3 Cinacalcet HCl (Sensipar)                    | Amgen                | Calcimimetic, calcium sensing receptor agonist                                 | Secondary hyper-parathyroidism, hypercalcaemia                                  | 03/08/2004    | P, O   |
| 4 Telithromycin (Ketek)                        | Sanofi               | Ketolide antibiotic                                                            | Respiratory infections                                                          | 04/01/2004    | S      |
| 5 Secretin synthetic human (Chirostim)         | ChiRhoClin           | Pancreatic and gastrin secretagogue                                            | Exocrine pancreas dysfunction, gastrinoma (diagnostic)                          | 04/09/2004    | P      |
| 6 Apomorphine HCl (Apokyn)                     | MDD US               | Non-ergoline dopamine D2 agonist                                               | Parkinson's disease                                                             | 04/20/2004    | P, O   |
| 7 Tinidazole (Tindamax)                        | Mission Pharma       | Antiprotozoal agent                                                            | Giardiasis, amoebiasis and trichomoniasis                                       | 05/17/2004    | S, O   |
| 8 Azacitidine (Vidaza)                         | Celgene              | Antineoplastic pyrimidine nucleoside analogue, DNA methyltransferase inhibitor | Myelodysplastic syndrome                                                        | 05/19/2004    | P, O   |
| 9 Rifaximin (Xifaxan)                          | Salix Pharmas        | Rifaximin-based non-systemic antibiotic                                        | Traveler's diarrhea                                                             | 05/25/2004    | S, O   |
| 10 Trospium chloride (Sanctura)                | Allergan             | Antimuscarinic antispasmodic                                                   | Overactive bladder                                                              | 05/28/2004    | S      |
| 11 L-Glutamine (NutreStore)                    | Emmaus Medcl         | Amino acid supplement                                                          | Short bowel syndrome                                                            | 06/10/2004    | S, O   |
| 12 Acamprosate calcium (Campral)               | Forest Labs          | Neurotransmitter $\gamma$ -aminobutyric acid (GABA) analog                     | Alcohol dependence                                                              | 07/29/2004    | P      |
| 13 Duloxetine HCl (Cymbalta)                   | Lilly                | Serotonin- and norepinephrine-reuptake inhibitor                               | Diabetic peripheral neuropathy                                                  | 08/03/2004    | S      |
| 14 Pentetate calcium trisodium                 | Hameln               | Chelating agent                                                                | Internal radioactive contamination                                              | 08/11/2004    | P, O   |
| 15 Pentetate zinc trisodium                    | Hameln               | Chelating agent                                                                | Internal radioactive contamination                                              | 08/11/2004    | P, O   |
| 16 Pegaptanib sodium (Macugen)                 | Valeant Pharms       | Selective VEGF antagonist                                                      | Neovascular age-related macular degeneration                                    | 09/17/2004    | P      |
| 17 Lanthanum carbonate (Fosrenol)              | Takeda               | Phosphate binder                                                               | Hyperphosphatemia in end-stage renal failure                                    | 10/26/2004    | S      |
| 18 $\omega$ 3-acid ethyl esters (Lovaza)       | Woodward             | Lipid-regulating agent                                                         | Hypertriglyceridemia                                                            | 11/10/2004    | S      |
| 19 Erlotinib HCl (Tarceva)                     | OSI Pharmas          | EGFR inhibitor                                                                 | Non-small-cell lung cancer (NSCLC)                                              | 11/18/2004    | P      |
| 20 Solifenacin succinate (Vesicare)            | Astellas             | Muscarinic M2/3 receptors antagonist                                           | Overactive bladder                                                              | 11/19/2004    | S      |
| 21 Gadobenate dimeglumine (Multihance)         | Bracco               | Gadolinium-based MRI contrast agent                                            | MRI imaging of liver, heart and central nervous system (CNS)                    | 11/23/2004    | S      |
| 22 Eszopiclone (Lunesta)                       | Sunovion Pharms      | Non-benzodiazepine hypnotic, GABA-A receptor stimulator                        | Insomnia                                                                        | 12/15/2004    | S      |
| 23 Trypan blue (Visionblue)                    | DORC                 | Selective staining of the anterior lens capsule                                | Cataract surgery                                                                | 12/16/2004    | P      |
| 24 Darifenacin HBr (Enablex)                   | APIL                 | Selective muscarinic M3 receptor antagonist                                    | Overactive bladder                                                              | 12/22/2004    | S      |
| 25 Ziconotide acetate (Prialt)                 | Tersera              | N-type calcium channel blocker                                                 | Severe chronic pain                                                             | 12/28/2004    | P      |
| 26 Clotfarabine (Clolar)                       | Genzyme              | Nucleoside antimetabolite, DNA synthesis inhibitor                             | Relapsed or refractory acute lymphoblastic leukemia                             | 12/28/2004    | P, O   |
| 27 Iloprost (Ventavis)                         | Actelion             | Prostacyclin analog                                                            | Pulmonary arterial hypertension                                                 | 12/29/2004    | P, O   |
| 28 Pregabalin (Lyrica)                         | Upjohn               | Neurotransmitter $\gamma$ -aminobutyric acid (GABA) analog                     | Diabetic peripheral neuropathy and post-herpetic neuralgia pain                 | 12/30/2004    | P      |
| <b>2004 Biologics license applications = 8</b> |                      |                                                                                |                                                                                 |               |        |
| 1 Cetuximab (Erbix)                            | ImClone              | EGFR-directed mAb                                                              | Colorectal cancer                                                               | 02/12/2004    | N/A    |
| 2 Bevacizumab (Avastin)                        | Genentech            | VEGF-A-directed mAb                                                            | Colorectal cancer                                                               | 02/26/2004    | O      |
| 3 Insulin glulisine recombinant (Apidra)       | Sanofi               | Recombinant human insulin [Lys (B3), Glu (B29)]                                | Type 1 and type 2 diabetes                                                      | 04/16/2004    | N/A    |
| 4 Hyaluronidase (Vitrase)                      | Bausch & Lomb        | Connective-tissue-permeability modifier (Ovine)                                | Adjunct in subcutaneous urography for improving resorption of radiopaque agents | 05/05/2004    | N/A    |
| 5 Hyaluronidase (Amphadase)                    | Amphastar Pharm      | Connective-tissue-permeability modifier (Bovine)                               |                                                                                 | 10/26/2004    | N/A    |
| 6 Technetium (99m Tc) fanolesomab (NeutroSpec) | Palatin Technologies | <sup>99m</sup> Tc labelled CD15-directed mAb                                   | Imaging and detection of appendicitis                                           | 07/02/2004    | N/A    |
| 7 Natalizumab (Tysabri)                        | Biogen Idec          | $\alpha$ 4-integrin-directed mAb                                               | Crohn's disease or multiple sclerosis                                           | 11/23/2004    | N/A    |
| 8 Palifermin (Kepivance)                       | Biovitrum            | Recombinant human keratinocyte growth factor                                   | Oral mucositis following radiation or chemotherapy                              | 12/15/2004    | N/A    |



## Supplementary data: Table 1 – FDA-approved drugs (Continued)

| Drug (brand name)                                        | Sponsor              | Properties                                                                                                | Indication                                                                                                                                                   | Approval date | Review |
|----------------------------------------------------------|----------------------|-----------------------------------------------------------------------------------------------------------|--------------------------------------------------------------------------------------------------------------------------------------------------------------|---------------|--------|
| <b>2005 New molecular entities = 13</b>                  |                      |                                                                                                           |                                                                                                                                                              |               |        |
| 1 Pramlintide acetate (Symlin)                           | AstraZeneca          | Amylin analog, glucoregulatory hormone                                                                    | Type 1 and 2 diabetes                                                                                                                                        | 03/16/2005    | S      |
| 2 Micafungin sodium (Mycamine)                           | Astellas             | Inhibits fungal cell wall by inhibiting $\beta$ -1,3-D-glucan synthesis                                   | Candida infections in patients undergoing hematopoietic stem cell transplantation                                                                            | 03/16/2005    | S      |
| 3 Entecavir (Baraclude)                                  | Bristol-Myers Squibb | Nucleoside analog                                                                                         | Chronic hepatitis B virus infection                                                                                                                          | 03/29/2005    | P      |
| 4 Exenatide synthetic (Byetta)                           | AstraZeneca          | Incretin mimetics, human glucagon-like peptide-1 (GLP-1) receptor agonist                                 | Type 2 diabetes                                                                                                                                              | 04/28/2005    | S      |
| 5 Tigecycline (Tygacil)                                  | Merck & Co           | Tetracycline antibiotic, inhibits protein translation in bacteria by binding to the 30S ribosomal subunit | Complicated skin and skin structure infections and complicated intra-abdominal infections                                                                    | 06/15/2005    | P      |
| 6 Tipranavir (Aptivus)                                   | Boehringer Ingelheim | HIV-1 protease inhibitor                                                                                  | HIV-1 infection                                                                                                                                              | 06/22/2005    | P      |
| 7 Ramelteon (Rozerem)                                    | Takeda               | Melatonin receptor agonist                                                                                | Insomnia                                                                                                                                                     | 07/22/2005    | S      |
| 8 Nepafenac (Nevanac)                                    | Novartis             | Nonsteroidal anti-inflammatory prodrug                                                                    | Pain and inflammation associated with cataract surgery                                                                                                       | 08/19/2005    | P      |
| 9 Nelarabine (Arranon)                                   | Novartis             | Purine nucleoside analog, inhibits the DNA elongation                                                     | T-cell acute lymphoblastic leukaemia and T-cell lymphoblastic lymphoma                                                                                       | 10/28/2005    | P, O   |
| 10 Deferasirox (Exjade)                                  | Novartis             | Iron chelator                                                                                             | Chronic iron overload due to blood transfusions                                                                                                              | 11/02/2005    | P, O   |
| 11 Sorafenib tosylate (Nexavar)                          | Bayer                | Multi-target TKI (VEGFR2/3, PDGFR $\beta$ , FLT3, KIT, RAF1, and BRAF)                                    | Advanced renal cell carcinoma                                                                                                                                | 12/01/2005    | P, O   |
| 12 Lenalidomide (Revlimid)                               | Celgene              | Thalidomide derivative, immunomodulatory and antiangiogenic agent                                         | Transfusion-dependent anemia due to myelodysplastic syndromes associated with a deletion 5q abnormality with or without additional cytogenetic abnormalities | 12/27/2005    | P, O   |
| 13 Conivaptan HCl (Vaprisol)                             | Cumberland Pharms    | Antidiuretic hormone (Vasopressin) inhibitor                                                              | Euvolemic hyponatremia in hospitalized patients                                                                                                              | 12/29/2005    | S      |
| <b>2005 Biologics license applications = 7</b>           |                      |                                                                                                           |                                                                                                                                                              |               |        |
| 1 Galsulfase (Naglazyme)                                 | Biomarin             | Recombinant human N-acetylgalactosamine 4-sulfatase                                                       | Mucopolysaccharidosis VI                                                                                                                                     | 05/31/2005    | P, O   |
| 2 Insulin detemir recombinant (Levemir)                  | Novo Nordisk         | Recombinant human insulin [ $\Delta$ Thr (B30)]                                                           | Type 1 and 2 diabetes                                                                                                                                        | 06/16/2005    | N/A    |
| 3 Mecasermin recombinant (Increlex)                      | Ipsen                | Recombinant DNA-origin human insulin-like growth factor 1 (IGF-1)                                         | Growth failure in pediatric patients with primary IGF-1 deficiency or growth hormone gene deletion                                                           | 08/30/2005    | P, O   |
| 4 Hyaluronidase (Hydase)                                 | Akorn                | Connective-tissue-permeability modifier (Bovine)                                                          | Hypodermoclysis, and in subcutaneous urography for improving resorption of radiopaque agents                                                                 | 10/25/2005    | P      |
| 5 Hyaluronidase recombinant human (Hyalenex recombinant) | Halozyme Therap      | Connective-tissue-permeability modifier (Human)                                                           | Subcutaneous urography for improving resorption of radiopaque agents                                                                                         | 12/02/2005    | P      |
| 6 Mecasermin rinfabate recombinant (iPlex)               | Insmed               | Recombinant DNA-origin IGF-1                                                                              | Growth failure in children with severe primary IGF-1 deficiency                                                                                              | 12/12/2005    | O      |
| 7 Abatacept (Orencia)                                    | Bristol-Myers Squibb | Selective T-cell co-stimulation modulator                                                                 | Rheumatoid arthritis                                                                                                                                         | 12/23/2005    | P      |

## Supplementary data: Table 1 – FDA-approved drugs (Continued)

| Drug (brand name)                                                         | Sponsor              | Properties                                                                                                                                                                                                                                  | Indication                                                                          | Approval date | Review |
|---------------------------------------------------------------------------|----------------------|---------------------------------------------------------------------------------------------------------------------------------------------------------------------------------------------------------------------------------------------|-------------------------------------------------------------------------------------|---------------|--------|
| <b>2006 New molecular entities = 18</b>                                   |                      |                                                                                                                                                                                                                                             |                                                                                     |               |        |
| 1 Sunitinib malate (Sutent)                                               | CPPI CV              | Multi-target TKI (VEGFRs, PDGFR $\alpha/\beta$ , CSF1R, KIT, and FLT3)                                                                                                                                                                      | Imatinib-resistant gastrointestinal stromal tumor and advanced renal cell carcinoma | 01/26/2006    | P      |
| 2 Ranolazine (Ranexa)                                                     | Gilead Sciences      | Sodium and potassium ion channel inhibitor                                                                                                                                                                                                  | Chronic angina                                                                      | 01/27/2006    | S      |
| 3 Lubiprostone (Amitiza)                                                  | Sucampo Pharma       | Chloride channel inhibitor                                                                                                                                                                                                                  | Constipation                                                                        | 01/31/2006    | S      |
| 4 Anidulafungin (Eraxis)                                                  | Vicuron Holdings     | Fungal cell-wall synthesis inhibitor                                                                                                                                                                                                        | Esophageal candidiasis                                                              | 02/17/2006    | S      |
| 5 Decitabine (Dacogen)                                                    | Otsuka               | Demethylating agent                                                                                                                                                                                                                         | Myelodysplastic syndrome                                                            | 05/02/2006    | S, O   |
| 6 Varenicline tartrate (Chantix)                                          | Merck & Co           | Nicotinic acetylcholine receptor (nACh-R) agonist                                                                                                                                                                                           | Smoking cessation                                                                   | 05/10/2006    | P      |
| 7 Rasagiline mesylate (Azilect)                                           | Teva                 | Monoamine oxidase B inhibitor                                                                                                                                                                                                               | Parkinson's disease                                                                 | 05/16/2006    | S      |
| 8 Darunavir (Prezista)                                                    | Janssen Prods        | HIV-1 protease inhibitor                                                                                                                                                                                                                    | HIV-1 infection                                                                     | 06/23/2006    | P      |
| 9 Dasatinib (Sprycel)                                                     | Bristol-Myers Squibb | Tyrosine kinase inhibitor                                                                                                                                                                                                                   | Chronic myeloid leukemia                                                            | 06/28/2006    | P, O   |
| 10 Avobenzone; Ecamsule; Octocrylene (Anthelios SX)                       | Loreal USA           | UVA/UVB filter                                                                                                                                                                                                                              | Prevention of sunburn                                                               | 07/21/2006    | S      |
| 11 Posaconazole (Noxafil)                                                 | Schering             | Fungal cell-wall synthesis inhibitor                                                                                                                                                                                                        | <i>Aspergillus</i> and <i>Candida</i> infection                                     | 09/15/2006    | P      |
| 12 Bismuth subcitrate potassium; Metronidazole; Tetracycline HCl (Pylera) | Allergan             | Bismuth subcitrate potassium inhibits peptic activity; Metronidazole inhibits bacterial and protozoal nucleic acid synthesis; Tetracycline HCl interferes with protein synthesis by preventing binding of tRNA to the mRNA-ribosome complex | Gastric and duodenal ulcers caused by <i>H. pylori</i> infection                    | 09/28/2006    | S      |
| 13 Vorinostat (Zolinza)                                                   | Merck & Co           | Histone deacetylase inhibitor                                                                                                                                                                                                               | Cutaneous T-cell lymphoma                                                           | 10/06/2006    | P, O   |
| 14 Sitagliptin phosphate (Januvia)                                        | Merck & Co           | DPP4 inhibitor                                                                                                                                                                                                                              | Type 2 diabetes                                                                     | 10/16/2006    | S      |
| 15 Ciclesonide (Omnaris)                                                  | Covis                | Corticosteroid                                                                                                                                                                                                                              | Allergic rhinitis                                                                   | 10/20/2006    | S      |
| 16 Telbivudine (Tyzeka)                                                   | Novartis             | Reverse transcriptase inhibitor                                                                                                                                                                                                             | Chronic hepatitis B                                                                 | 10/25/2006    | S      |
| 17 Sinecatechins (Veregen)                                                | Ani Pharms           | Antioxidant                                                                                                                                                                                                                                 | External genital and perianal warts                                                 | 10/31/2006    | S      |
| 18 Paliperidone (Invega)                                                  | Janssen Pharms       | Dopamine D2 and 5-HT <sub>2A</sub> receptor antagonist                                                                                                                                                                                      | Schizophrenia                                                                       | 12/19/2006    | S      |
| <b>2006 Biologics license applications = 4</b>                            |                      |                                                                                                                                                                                                                                             |                                                                                     |               |        |
| 1 Alglucosidase alfa (Myozyme)                                            | Genzyme              | Recombinant human $\alpha$ -glucosidase                                                                                                                                                                                                     | $\alpha$ -glucosidase deficiency (Pompe disease)                                    | 04/28/2006    | O      |
| 2 Ranibizumab (Lucentis)                                                  | Genentech            | VEGF-A-directed mAb fragment                                                                                                                                                                                                                | Neovascular (wet) age-related macular degeneration                                  | 06/30/2006    | N/A    |
| 3 Idursulfase (Elaprase)                                                  | Shire                | Recombinant human iduronate-2-sulfatase                                                                                                                                                                                                     | Hunter syndrome (Mucopolysaccharidosis II)                                          | 07/24/2006    | O      |
| 4 Panitumumab (Vectibix)                                                  | Amgen                | EGFR-directed mAb                                                                                                                                                                                                                           | EGFR-expressing metastatic colorectal carcinoma                                     | 09/27/2006    | N/A    |

## Supplementary data: Table 1 – FDA-approved drugs (Continued)

| Drug (brand name)                                    | Sponsor         | Properties                                                                        | Indication                                                                              | Approval date | Review |
|------------------------------------------------------|-----------------|-----------------------------------------------------------------------------------|-----------------------------------------------------------------------------------------|---------------|--------|
| <b>2007 New molecular entities = 17</b>              |                 |                                                                                   |                                                                                         |               |        |
| 1 Lisdexamfetamine dimesylate (Vyvanse)              | Takeda          | Prodrug of dextroamphetamine with CNS stimulant activity                          | Attention-deficit/hyperactivity disorder                                                | 02/23/2007    | S      |
| 2 Aliskiren Hemifumarate (Tekturna)                  | Noden Pharma    | Direct renin inhibitor                                                            | Hypertension                                                                            | 03/05/2007    | S      |
| 3 Lapatinib Ditosylate (Tykerb)                      | Novartis        | HER2 and EGFR inhibitor                                                           | Advanced or metastatic breast cancer (HER2-positive)                                    | 03/13/2007    | P      |
| 4 Retapamulin (Altabax)                              | Almirall        | Bacterial protein-synthesis inhibitor                                             | Impetigo                                                                                | 04/12/2007    | S      |
| 5 Rotigotine (Neupro)                                | UCB Inc         | Dopamine receptor agonist                                                         | Early-stage idiopathic Parkinson's disease                                              | 05/09/2007    | S      |
| 6 Temsirolimus (Torisel)                             | Merck & Co      | Mammalian target of rapamycin (mTOR) inhibitor                                    | Advanced renal cell carcinoma                                                           | 05/30/2007    | P, O   |
| 7 Ambrisentan (Letairis)                             | Gilead Sciences | Endothelin receptor antagonist                                                    | Pulmonary arterial hypertension                                                         | 06/15/2007    | P, O   |
| 8 Maraviroc (Selzentry)                              | Viiv Hlthcare   | CCR5 co-receptor antagonist                                                       | CCR5-tropic HIV-1                                                                       | 08/06/2007    | P      |
| 9 Ammonia N-13 (Ammonia N 13)                        | Feinstein       | <sup>13</sup> N labelled radioactive diagnostic agent                             | Radioactive agent for positron emission tomography diagnosis of coronary artery disease | 08/23/2007    | S      |
| 10 Lanreotide (Somatuline depot)                     | Ipsen Pharma    | Somatostatin analog                                                               | Acromegaly                                                                              | 08/30/2007    | S, O   |
| 11 Doripenem (Doribax)                               | Shionogi        | Synthetic broad-spectrum carbapenem antibiotic                                    | Urinary tract infections                                                                | 10/12/2007    | S      |
| 12 Raltegravir potassium (Isentress)                 | Merck & Co      | HIV integrase strand transfer inhibitor                                           | HIV-1 infection                                                                         | 10/12/2007    | P      |
| 13 Ixabepilone (Ixempra)                             | R-Pharm US      | Microtubule-stabilizing agent                                                     | Advanced or metastatic breast cancer                                                    | 10/16/2007    | P      |
| 14 Nilotinib HCl (Tasigna)                           | Novartis        | BCR-ABL kinase inhibitor                                                          | Chronic myelogenous leukemia                                                            | 10/29/2007    | S, O   |
| 15 Sapropterin 2HCl (Kuvan)                          | Biomarin Pharm  | Synthetic tetrahydrobiopterin, co-factor for the enzyme phenylalanine hydroxylase | Hyperphenylalaninemia                                                                   | 12/13/2007    | P, O   |
| 16 Nebivolol HCl (Bystolic)                          | Allergan        | β-adrenoceptor antagonist                                                         | Hypertension                                                                            | 12/17/2007    | S      |
| 17 Hydroxyethyl starch (Voluven)                     | Fresenius Kabi  | Blood volume expander                                                             | Serious blood volume loss                                                               | 12/27/2007    | N/A    |
| <b>2007 Biologics license applications = 2</b>       |                 |                                                                                   |                                                                                         |               |        |
| 1 Eculizumab (Soliris)                               | Alexion Pharm   | Complement protein C5-directed mAb                                                | Paroxysmal nocturnal hemoglobinuria                                                     | 03/16/2007    | P, O   |
| 2 Methoxy polyethylene glycol-epoetin beta (Mircera) | Roche           | Erythropoietin receptor activator                                                 | Anemia associated with chronic renal failure                                            | 11/14/2007    | P      |

## Supplementary data: Table 1 – FDA-approved drugs (Continued)

| Drug (brand name)                                                                      | Sponsor                 | Properties                                                                                                                         | Indication                                                                                                          | Approval date | Review |
|----------------------------------------------------------------------------------------|-------------------------|------------------------------------------------------------------------------------------------------------------------------------|---------------------------------------------------------------------------------------------------------------------|---------------|--------|
| <b>2008 New molecular entities = 22</b>                                                |                         |                                                                                                                                    |                                                                                                                     |               |        |
| 1 Etravirine (Intencele)                                                               | Janssen R&D             | Non-nucleoside HIV-1 reverse transcriptase inhibitor                                                                               | HIV-1 infection                                                                                                     | 01/18/2008    | P      |
| 2 Fosaprepitant dimeglumine (Emend)                                                    | Merck & Co              | Prodrug of aprepitant, NK1 receptor antagonist                                                                                     | Nausea and vomiting caused by chemotherapy                                                                          | 01/25/2008    | S      |
| 3 Desvenlafaxine Succinate (Pristiq)                                                   | Pfizer                  | Selective serotonin and noradrenaline reuptake inhibitor                                                                           | Major depressive disorder                                                                                           | 02/29/2008    | S      |
| 4 Bendamustine HCl (Treanda)                                                           | Cephalon                | Mechlorethamine derivative with DNA-alkylating activity                                                                            | Chronic lymphocytic leukemia                                                                                        | 03/20/2008    | P, O   |
| 5 Regadenoson (lexiscan)                                                               | Astellas                | A <sub>2A</sub> adenosine receptor agonist                                                                                         | Pharmacological stress agent for radionuclide imaging                                                               | 04/10/2008    | S      |
| 6 Methylnaltrexone bromide (Relistor)                                                  | Salix Pharms            | Peripherally acting $\mu$ opioid receptor antagonist                                                                               | Opioid-induced constipation                                                                                         | 04/24/2008    | S      |
| 7 Alvimopan (Entereg)                                                                  | Cubist Pharms           | Peripherally acting $\mu$ opioid receptor antagonist                                                                               | To accelerate gastrointestinal recovery following bowel resection surgery                                           | 05/20/2008    | S      |
| 8 Difluprednate (Durezol)                                                              | Novartis                | Ocular corticosteroid thought to act by the induction of phospholipase A2 inhibitory proteins                                      | Inflammation and pain associated with ocular surgery                                                                | 06/23/2008    | P, O   |
| 9 Gadoxetate disodium (Eovist)                                                         | Bayer                   | Gadolinium-based contrast agent                                                                                                    | MRI diagnosis of liver lesions                                                                                      | 07/03/2008    | S      |
| 10 Clevidipine (Cleviprex)                                                             | Chiesi                  | Short-acting dihydropyridine calcium channel antagonist                                                                            | Peri-operative hypertension when oral therapy is not feasible or not desirable                                      | 08/01/2008    | S      |
| 11 Tetrabenazine (Xenazine)                                                            | Bausch                  | Monoamine-depleting agent                                                                                                          | Chorea associated with Huntington's disease                                                                         | 08/15/2008    | P, O   |
| 12 Iobenguane sulfate I-123 (AdreView)                                                 | GE Healthcare           | Taken up by the noradrenaline transporter in adrenergic nerve terminals                                                            | Radiopharmaceutical agent, detection of primary or metastatic pheochromocytoma or neuroblastoma                     | 09/19/2008    | P, O   |
| 13 Silodosin (Rapaflo)                                                                 | Allergan                | $\alpha$ 1-adrenoceptor antagonist                                                                                                 | Benign prostatic hyperplasia                                                                                        | 10/08/2008    | S      |
| 14 Lacosamide (Vimpat)                                                                 | UCB Inc                 | Selectively enhances slow inactivation of voltage-gated sodium channels and binds to collapsin response mediator protein 2         | Partial-onset seizures in epilepsy                                                                                  | 10/28/2008    | S      |
| 15 Fesoterodine fumarate (Toviaz)                                                      | Pfizer                  | Competitive muscarinic receptor antagonist                                                                                         | Overactive bladder disorder                                                                                         | 10/31/2008    | S      |
| 16 Rufinamide (Banzel)                                                                 | Eisai                   | Sodium channel activity modulator                                                                                                  | Seizures associated with Lennox-Gastaut syndrome                                                                    | 11/14/2008    | S      |
| 17 Eltrombopag olamine (Promacta)                                                      | Novartis                | Thrombopoietin receptor agonist                                                                                                    | Thrombocytopenia in patients with chronic immune (idiopathic) thrombocytopenic purpura                              | 11/20/2008    | P, O   |
| 18 Tapentadol HCl (Nucynta)                                                            | Collegium Pharm         | $\mu$ opioid receptor agonist and noradrenaline reuptake inhibitor                                                                 | Moderate to severe acute pain                                                                                       | 11/20/2008    | S      |
| 19 Fospropofol disodium (lusedra)                                                      | Eisai                   | Prodrug of propofol                                                                                                                | Monitored anesthesia care sedation                                                                                  | 12/12/2008    | S      |
| 20 Plerixafor (Mozobil)                                                                | Genzyme                 | CXCR4 antagonist                                                                                                                   | Autologous transplantation in patients with non-Hodgkin's lymphoma and multiple myeloma                             | 12/15/2008    | P, O   |
| 21 Gadofosveset Trisodium (Vasovist)                                                   | Lantheus Medcl          | Gadolinium-based contrast agent                                                                                                    | Magnetic resonance angiography (MRA) diagnosis of aortoiliac occlusive disease (AIOD)                               | 12/22/2008    | S      |
| 22 Degarelix acetate (Firmagon)                                                        | Ferring                 | GnRH receptor antagonist                                                                                                           | Advanced prostate cancer                                                                                            | 12/24/2008    | S      |
| <b>2008 Biologics license applications = 5</b>                                         |                         |                                                                                                                                    |                                                                                                                     |               |        |
| 1 Somatropin (Accretropin)                                                             | Emergent                | Recombinant human growth hormone                                                                                                   | Growth failure, growth hormone deficiency                                                                           | 01/23/2008    | N/A    |
| 2 Rilonacept (Arcalyst)                                                                | Kiniksa Pharma (UK) Ltd | IL-1 blocker, dimeric fusion protein consisting of portions of IL-1R and the IL-1R accessory protein linked to the Fc portion IgG1 | Cryopyrin-associated periodic syndromes including familial cold autoinflammatory syndrome and Muckle-wells syndrome | 02/27/2008    | P, O   |
| 3 Certolizumab pegol (Cimzia)                                                          | UCB Inc                 | TNF $\alpha$ blocker, pegylated anti-TNF $\alpha$ IgG1 (Fab)                                                                       | Crohn's disease                                                                                                     | 04/22/2008    | S      |
| 4 Romiplostim (Nplate)                                                                 | Amgen                   | Thrombopoietin receptor agonist, thrombopoiesis stimulating dimer Fc-peptide fusion protein (Peptibody)                            | Thrombocytopenia in patients with chronic immune (idiopathic) thrombocytopenic purpura                              | 08/22/2008    | P, O   |
| 5 Insulin aspart protamine recombinant; Insulin aspart recombinant (Novolog mix 50/50) | Novo Nordisk            | Recombinant human insulin [Asp (B28)]                                                                                              | Type 1 & 2 diabetes                                                                                                 | 08/26/2008    | N/A    |

## Supplementary data: Table 1 – FDA-approved drugs (Continued)

| Drug (brand name)                              | Sponsor                | Properties                                                                                                     | Indication                                                                                                                                   | Approval date | Review  |
|------------------------------------------------|------------------------|----------------------------------------------------------------------------------------------------------------|----------------------------------------------------------------------------------------------------------------------------------------------|---------------|---------|
| <b>2009 New molecular entities = 20</b>        |                        |                                                                                                                |                                                                                                                                              |               |         |
| 1 Milnacipran HCl (Savella)                    | Allergan               | Selective serotonin and noradrenaline reuptake inhibitor                                                       | Fibromyalgia                                                                                                                                 | 01/14/2009    | S       |
| 2 Febuxostat (Uloric)                          | Takeda                 | Xanthine oxidase inhibitor                                                                                     | Hyperuricemia in patients with gout                                                                                                          | 02/13/2009    | S       |
| 3 Everolimus (Afinitor)                        | Novartis               | Mammalian target of rapamycin (mTOR) inhibitor                                                                 | Advanced renal cell carcinoma                                                                                                                | 03/30/2009    | P       |
| 4 Artemether; Lumefantrine (Coartem)           | Novartis               | Works against the erythrocytic stages of <i>P. falciparum</i> by inhibiting nucleic acid and protein synthesis | Malaria                                                                                                                                      | 04/07/2009    | P, O    |
| 5 Benzyl alcohol (Ulesfia)                     | Shionogi               | Closes the respiratory spiracles of lice and causes the lice to asphyxiate                                     | Head lice                                                                                                                                    | 04/09/2009    | S       |
| 6 Iloperidone (Fanapt)                         | Vanda Pharms           | Atypical antipsychotic agent, 5-HT <sub>2A</sub> and dopamine D <sub>2</sub> receptors antagonist              | Schizophrenia                                                                                                                                | 05/06/2009    | S       |
| 7 Tolvaptan (Samsca)                           | Otsuka                 | Selective vasopressin V <sub>2</sub> receptor antagonist                                                       | Hypervolemic and euvolemic hyponatremia, including patients with heart failure, cirrhosis and syndrome of inappropriate antidiuretic hormone | 05/19/2009    | S       |
| 8 Besifloxacin HCl (Besivance)                 | Bausch & Lomb          | Fluoroquinolone antimicrobial agent that inhibits bacterial topoisomerase II (DNA gyrase) and topoisomerase IV | Bacterial conjunctivitis                                                                                                                     | 05/28/2009    | S       |
| 9 Dronedarone HCl (Multaq)                     | Sanofi                 | Multi-channel blocker, including potassium, sodium, and calcium channels                                       | Atrial fibrillation and atrial flutter                                                                                                       | 07/01/2009    | P       |
| 10 Prasugrel HCl (Effient)                     | Daiichi Sankyo         | Platelet P <sub>2Y12</sub> purinoceptor inhibitor                                                              | Reduction of thrombotic cardiovascular events in patients with acute coronary syndrome undergoing percutaneous coronary intervention         | 07/10/2009    | P       |
| 11 Saxagliptin HCl (Onglyza)                   | AstraZeneca            | Dipeptidyl peptidase 4 inhibitor                                                                               | Type 2 diabetes                                                                                                                              | 07/31/2009    | S       |
| 12 Pitavastatin calcium (Livalo)               | Kowa Co                | HMG CoA reductase inhibitor                                                                                    | Hyperlipidemia and mixed dyslipidemia                                                                                                        | 08/03/2009    | S       |
| 13 Asenapine Maleate (Saphris)                 | Allergan               | Atypical antipsychotic agent, 5-HT <sub>2A</sub> and dopamine D <sub>2</sub> receptors antagonist              | Schizophrenia and bipolar disorder                                                                                                           | 08/13/2009    | S       |
| 14 Vigabatrin (Sabril)                         | Lundbeck               | Irreversible γ-aminobutyric acid transaminase inhibitor                                                        | Infantile spasms in children aged 1 month to 2 years and complex partial seizures in adults                                                  | 08/21/2009    | P, O, S |
| 15 Bepotastine besilate (Bepreve)              | Bausch & Lomb          | Histamine H <sub>1</sub> receptor antagonist                                                                   | Allergic conjunctivitis                                                                                                                      | 09/04/2009    | S       |
| 16 Telavancin HCl (Vibativ)                    | Cumberland Pharms      | Semi-synthetic derivative of vancomycin, bacterial cell wall synthesis inhibitor                               | Complicated skin and skin structure infections                                                                                               | 09/11/2009    | S       |
| 17 Pralatrexate (Folotyn)                      | Acrotech               | Folate analogue metabolic inhibitor that competitively inhibits dihydrofolate reductase                        | Peripheral T cell lymphoma                                                                                                                   | 09/24/2009    | P, O    |
| 18 Pazopanib HCl (Votrient)                    | Novartis               | Multi-target TKI (VEGFRs, PDGFRα/β, FGFR1/2, KIT)                                                              | Advanced renal cell carcinoma                                                                                                                | 10/19/2009    | S       |
| 19 Romidepsin (Istodax)                        | Celgene                | Histone deacetylase inhibitor                                                                                  | Cutaneous T cell lymphoma                                                                                                                    | 11/05/2009    | S       |
| 20 Capsaicin (Qutenza)                         | Averitas               | Transient receptor potential vanilloid 1 (TRPV1) receptor agonist                                              | Neuropathic pain associated with post-herpetic neuralgia                                                                                     | 11/16/2009    | S, O    |
| <b>2009 Biologics license applications = 6</b> |                        |                                                                                                                |                                                                                                                                              |               |         |
| 1 Golimumab (Simponi)                          | Centocor Ortho Biotech | TNFα-directed mAb                                                                                              | Rheumatoid arthritis, psoriatic arthritis, and ankylosing spondylitis                                                                        | 04/24/2009    | S       |
| 2 Abobotulinum-toxin A (Dysport)               | Ipsen Biopharm         | Acetylcholine release inhibitor and neuromuscular blocking agent                                               | Cervical dystonia and glabellar lines                                                                                                        | 04/29/2009    | S       |
| 3 Canakinumab (Ilaris)                         | Novartis               | Interleukin-1β-directed mAb                                                                                    | Cryopyrin-associated periodic syndromes                                                                                                      | 06/17/2009    | P, O    |
| 4 Ustekinumab (Stelara)                        | Centocor Ortho Biotech | Interleukin (IL)-12 and IL-23 (p40 subunit)-directed mAb                                                       | Moderate-to-severe plaque psoriasis                                                                                                          | 09/25/2009    | S       |
| 5 Ofatumumab (Arzerra)                         | Novartis               | CD20-directed mAb                                                                                              | Chronic lymphocytic leukemia                                                                                                                 | 10/26/2009    | P, O    |
| Ofatumumab (Kesimpta)                          |                        |                                                                                                                | Relapsing forms of multiple sclerosis                                                                                                        |               |         |
| 6 Ecallantide (Kalbitor)                       | Dyax Corp              | Plasma kallikrein inhibitor                                                                                    | Hereditary angioedema                                                                                                                        | 12/01/2009    | P, O    |

## Supplementary data: Table 1 – FDA-approved drugs (Continued)

| Drug (brand name)                                | Sponsor              | Properties                                                                                          | Indication                                                       | Approval date | Review |
|--------------------------------------------------|----------------------|-----------------------------------------------------------------------------------------------------|------------------------------------------------------------------|---------------|--------|
| <b>2010 New molecular entities = 14</b>          |                      |                                                                                                     |                                                                  |               |        |
| 1 Dalfampridine (Ampyra)                         | Acorda Therapeutics  | Potassium channel blocker                                                                           | Improving walking in patients with multiple sclerosis            | 01/22/2010    | P, O   |
| 2 Liraglutide recombinant (Victoza)              | Novo Nordisk         | Glucagon-like peptide 1 (GLP1) receptor agonist                                                     | Type 2 diabetes                                                  | 01/25/2010    | P      |
| 3 Carglumic acid (Carbaglu)                      | Orphan Europe        | Carbamoyl phosphate synthetase 1 (CPS1) activator                                                   | Acute hyperammonemia                                             | 03/18/2010    | P, O   |
| 4 Polidocanol (Asclera)                          | Chemisch Fbrk Krsslr | Sclerosing agent                                                                                    | Uncomplicated spider veins and uncomplicated reticular veins     | 03/30/2010    | S      |
| 5 Dienogest; Estradiol valerate (Natazia)        | Bayer                | Semisynthetic progestogen; Estrogen                                                                 | Contraception                                                    | 05/06/2010    | S      |
| 6 Cabazitaxel (Jevtana kit)                      | Sanofi               | Microtubule-stabilizing agent                                                                       | Prostate cancer                                                  | 06/17/2010    | P      |
| 7 Alcaftadine (Lastacaft)                        | Allergan             | Histamine H1 receptor antagonist                                                                    | Allergic conjunctivitis                                          | 07/28/2010    | S      |
| 8 Ulipristal acetate (Ella)                      | Lab HRA Pharma       | Progesterone receptor modulator                                                                     | Contraception                                                    | 08/13/2010    | S      |
| 9 Fingolimod HCl (Gilenya)                       | Novartis             | Sphingosine 1-phosphate (S1P) receptor modulator                                                    | Multiple sclerosis                                               | 09/21/2010    | P      |
| 10 Dabigatran etexilate mesylate (Pradaxa)       | Boehringer Ingelheim | Direct thrombin inhibitor                                                                           | Stroke prevention in atrial fibrillation                         | 10/19/2010    | P      |
| 11 Lurasidone HCl (Latuda)                       | Sunovion Pharms      | Atypical antipsychotic agent, 5-HT <sub>2A/7</sub> and dopamine D <sub>2</sub> receptors antagonist | Schizophrenia                                                    | 10/28/2010    | S      |
| 12 Ceftaroline fosamil (Teflaro)                 | Cerexa               | Broad-spectrum cephalosporin antibiotic                                                             | Skin and skin-structure infections; Community acquired pneumonia | 10/29/2010    | S      |
| 13 Tesamorelin acetate (Egrifta)                 | Theratechnologies    | Growth hormone-releasing factor analog                                                              | HIV lipodystrophy                                                | 11/10/2010    | S      |
| 14 Eribulin mesylate (Halaven)                   | Eisai                | Microtubule-destabilizing agent                                                                     | Breast cancer                                                    | 11/15/2010    | P      |
| <b>2010 Biologics license applications = 7</b>   |                      |                                                                                                     |                                                                  |               |        |
| 1 Tocilizumab (Actemra)                          | Genentech            | Interleukin-6 (IL-6) receptor-directed mAb                                                          | Rheumatoid arthritis                                             | 01/08/2010    | N/A    |
| 2 Collagenase clostridium histolyticum (Xiaflex) | Auxilium Pharms      | Purified collagenase clostridium histolyticum                                                       | Dupuytren's contracture                                          | 02/02/2010    | O      |
| 3 Velaglucerase alfa (Vpriv)                     | Shire                | Recombinant human $\beta$ -glucocerebrosidase                                                       | Gaucher's disease                                                | 02/26/2010    | P      |
| 4 Alglucosidase alfa (Lumizyme)                  | Genzyme              | Recombinant human acid $\alpha$ -glucosidase                                                        | Pompe's disease                                                  | 05/24/2010    | O      |
| 5 Denosumab (Prolia)                             | Amgen                | RANK ligand (RANKL)-directed mAb                                                                    | Postmenopausal osteoporosis                                      | 06/01/2010    | O      |
| 6 IncobotulinumtoxinA (Xeomin)                   | Merz Pharms          | Acetylcholine release inhibitor and neuromuscular blocking agent                                    | Cervical dystonia and blepharospasm                              | 07/30/2010    | N/A    |
| 7 Pegloticase (Krystexxa)                        | Horizon Pharma       | PEGylated uric acid specific enzyme                                                                 | Gout                                                             | 09/14/2010    | O      |

## Supplementary data: Table 1 – FDA-approved drugs (Continued)

| Drug (brand name)                                     | Sponsor                   | Properties                                                                                                                             | Indication                                                                | Approval date | Review |
|-------------------------------------------------------|---------------------------|----------------------------------------------------------------------------------------------------------------------------------------|---------------------------------------------------------------------------|---------------|--------|
| <b>2011 New molecular entities = 24</b>               |                           |                                                                                                                                        |                                                                           |               |        |
| 1 Ioflupane I-123 (Datiscan)                          | GE Healthcare             | Dopamine transporter-binding imaging agent                                                                                             | Parkinsonian syndromes (Imaging agent)                                    | 01/14/2011    | P      |
| 2 Spinosad (Natroba)                                  | ParaPro                   | Causes neuronal hyperexcitation in insects                                                                                             | Head lice                                                                 | 01/18/2011    | S      |
| 3 Vilazodone HCl (Viibryd)                            | Allergan                  | Selective serotonin reuptake inhibitor and 5-HT <sub>1A</sub> partial agonist                                                          | Major depressive disorder                                                 | 01/21/2011    | S      |
| 4 Azilsartan kamedoxomil (Edarbi)                     | Arbor Pharms              | Angiotensin II type 1 receptor antagonist                                                                                              | Hypertension                                                              | 02/25/2011    | S      |
| 5 Roflumilast (Daliresp)                              | Forest Laboratories       | Phosphodiesterase 4 (PDE4) inhibitor                                                                                                   | COPD exacerbations                                                        | 02/28/2011    | S      |
| 6 Gadobutrol (Gadavist)                               | Bayer                     | Gadolinium-based contrast agent                                                                                                        | Blood-brain barrier imaging                                               | 03/14/2011    | S      |
| 7 Gabapentin enacarbil (Horizant)                     | Arbor Pharms              | Voltage-activated calcium channel inhibitor                                                                                            | Moderate-to-severe restless legs syndrome                                 | 04/06/2011    | S      |
| 8 Vandetanib (Caprelsa)                               | Genzyme                   | Multi-target TKI (VEGFR2/3, EGFR, and RET)                                                                                             | Unresectable or metastatic medullary thyroid cancer                       | 04/06/2011    | P, O   |
| 9 Abiraterone acetate (Zytiga)                        | Janssen Biotech           | CYP17A1 inhibitor                                                                                                                      | Metastatic castration-resistant prostate cancer                           | 04/28/2011    | P      |
| 10 Linagliptin (Tradjenta)                            | Boehringer Ingelheim      | Dipeptidyl peptidase 4 inhibitor                                                                                                       | Type 2 diabetes                                                           | 05/02/2011    | S      |
| 11 Boceprevir (Victrelis)                             | Merck & Co                | NS3/4A protease inhibitor                                                                                                              | HCV genotype 1                                                            | 05/13/2011    | P      |
| 12 Rilpivirine HCl (Edurant)                          | Janssen Prods             | Non-nucleoside HIV reverse transcriptase inhibitor                                                                                     | HIV-1 infection                                                           | 05/20/2011    | S      |
| 13 Telaprevir (Incivek)                               | Vertex Pharms             | NS3/4A protease inhibitor                                                                                                              | HCV genotype 1                                                            | 05/23/2011    | P      |
| 14 Fidaxomicin (Dificid)                              | Cubist Pharms             | RNA polymerase inhibitor                                                                                                               | <i>Clostridium difficile</i> -associated diarrhea                         | 05/27/2011    | P      |
| 15 Ezogabine (Potiga)                                 | GlaxoSmithKline           | Potassium channel opener                                                                                                               | Partial-onset seizures                                                    | 06/10/2011    | S      |
| 16 Indacaterol maleate (Arcapta neohaler)             | Novartis                  | Long-acting $\beta_2$ -adrenergic receptor agonist                                                                                     | Chronic obstructive pulmonary disease (COPD)                              | 07/01/2011    | S      |
| 17 Rivaroxaban (Xarelto)                              | Janssen Pharms            | Factor Xa inhibitor                                                                                                                    | Prophylaxis of deep vein thrombosis in hip and knee replacement surgery   | 07/01/2011    | S      |
| 18 Ticagrelor (Brilinta)                              | AstraZeneca               | P2Y <sub>12</sub> platelet inhibitor                                                                                                   | Thrombotic cardiovascular events in patients with acute coronary syndrome | 07/20/2011    | S      |
| 19 Vemurafenib (Zelboraf)                             | Roche                     | BRAF inhibitor                                                                                                                         | BRAF-positive unresectable or metastatic melanoma                         | 08/17/2011    | P, O   |
| 20 Icatibant acetate (Firazyr)                        | Shire                     | Bradykinin B2 receptor antagonist                                                                                                      | Hereditary angioedema                                                     | 08/25/2011    | P, O   |
| 21 Crizotinib (Xalkori)                               | Merck & Co                | Multi-target TKI (ALK, ROS1, and MET)                                                                                                  | ALK-positive advanced or metastatic NSCLC                                 | 08/26/2011    | P, O   |
| 22 Deferiprone (Ferroprox)                            | Chiesi                    | Iron chelator                                                                                                                          | Transfusional iron overload due to thalassemia syndromes                  | 10/14/2011    | S, O   |
| 23 Clobazam (Onfi)                                    | Lundbeck                  | Benzodiazepine, partial GABA-A receptors agonist                                                                                       | Seizures associated with Lennox-Gastaut syndrome                          | 10/21/2011    | S, O   |
| 24 Ruxolitinib phosphate (Jakafi)                     | Incyte Corp               | JAK1/JAK2 inhibitor                                                                                                                    | Intermediate or high-risk myelofibrosis                                   | 11/16/2011    | P, O   |
| <b>2011 Biologics license applications = 6</b>        |                           |                                                                                                                                        |                                                                           |               |        |
| 1 Belimumab (Benlysta)                                | Human Genome Sciences     | B-lymphocyte stimulator (BLyS)-directed mAb                                                                                            | Active, autoantibody-positive, systemic lupus erythematosus               | 03/09/2011    | P      |
| 2 Ipilimumab (Yervoy)                                 | Bristol-Myers Squibb      | Cytotoxic T-lymphocyte antigen 4 (CTLA-4)-directed mAb                                                                                 | Unresectable or metastatic melanoma                                       | 03/25/2011    | P, O   |
| 3 Belatacept (Nulojix)                                | Bristol-Myers Squibb      | T cell co-stimulation blocker; soluble fusion protein consisting of extracellular domain of human CTLA-4 and modified Fc region of IgG | Organ rejection in kidney transplant                                      | 06/15/2011    | S, O   |
| 4 Brentuximab vedotin (Adcetris)                      | Seattle Genetics          | CD30-directed antibody drug conjugate (ADC)                                                                                            | Hodgkin's lymphoma; systemic anaplastic large cell lymphoma               | 08/19/2011    | P, O   |
| 5 Aflibercept (Eylea)                                 | Regeneron Pharmaceuticals | VEGF inhibitor; recombinant protein consisting of binding domains of VEGFR and Fc region of IgG                                        | Neovascular (wet) age-related macular degeneration                        | 11/18/2011    | P      |
| 6 Asparaginase <i>Erwinia chrysanthemi</i> (Erwinaze) | EUSA Pharma (USA)         | <i>Erwinia chrysanthemi</i> -derived L-asparaginase                                                                                    | Acute lymphoblastic leukemia                                              | 11/18/2011    | P, O   |

## Supplementary data: Table 1 – FDA-approved drugs (Continued)

| Drug (brand name)                                                                    | Sponsor              | Properties                                                                                        | Indication                                                                                    | Approval date | Review |
|--------------------------------------------------------------------------------------|----------------------|---------------------------------------------------------------------------------------------------|-----------------------------------------------------------------------------------------------|---------------|--------|
| <b>2012 New molecular entities = 32</b>                                              |                      |                                                                                                   |                                                                                               |               |        |
| 1 Ingenol mebutate (Picato)                                                          | Leo Labs             | MOA unknown                                                                                       | Actinic keratosis                                                                             | 01/23/2012    | S      |
| 2 Axitinib (Inlyta)                                                                  | Pfizer               | VEGFRs inhibitor                                                                                  | Advanced renal cell carcinoma                                                                 | 01/27/2012    | S      |
| 3 Vismodegib (Erivedge)                                                              | Genentech            | Smoothened (Hedgehog pathway) inhibitor                                                           | Metastatic or locally advanced basal cell carcinoma                                           | 01/30/2012    | P      |
| 4 Ivacaftor (Kalydeco)                                                               | Vertex Pharms        | CFTR potentiator                                                                                  | Cystic fibrosis in patients with the G551D mutation in the <i>CFTR</i> gene                   | 01/31/2012    | P, O   |
| 5 Tafluprost (Zioptan)                                                               | Akorn                | Selective prostaglandin F prostanoid receptor agonist                                             | Elevated intraocular pressure in patients with open-angle glaucoma or ocular hypertension     | 02/10/2012    | S      |
| 6 Lucinactant (Surfaxin)                                                             | Windtree Therap      | Synthetic peptide-containing surfactant that mimics human surfactant protein-B                    | Prevention of respiratory distress syndrome                                                   | 03/06/2012    | S      |
| 7 Peginesatide acetate (Omontys)                                                     | Takeda               | Synthetic, pegylated erythropoiesis stimulating agent                                             | Anemia due to chronic kidney disease                                                          | 03/27/2012    | S      |
| 8 Florbetapir F-18 (Amyvid)                                                          | Avid Radiopharms     | <sup>18</sup> F labelled radioactive diagnostic agent                                             | Diagnostic agent to estimate amyloid-β plaques in patients with suspected Alzheimer's disease | 04/06/2012    | S      |
| 9 Avanafil (Stendra)                                                                 | Metuchen Pharms      | Phosphodiesterase 5 (PDE5) inhibitor                                                              | Erectile dysfunction                                                                          | 04/27/2012    | S      |
| 10 Lorcaserin (Belviq)                                                               | Eisai                | 5-HT <sub>2C</sub> receptor agonist                                                               | Obesity                                                                                       | 06/27/2012    | S      |
| 11 Mirabegron (Myrbetriq)                                                            | APGDI                | β <sub>3</sub> -adrenergic receptor agonist                                                       | Overactive bladder                                                                            | 06/28/2012    | S      |
| 12 Citric acid; Magnesium oxide; Sodium picosulfate (Prepopik)                       | Ferring Pharms       | Osmotic and stimulant laxatives                                                                   | Cleansing of the colon before colonoscopy                                                     | 07/16/2012    | S      |
| 13 Carfilzomib (Kyprolis)                                                            | Onyx Therap          | 20S proteasome inhibitor                                                                          | Multiple myeloma                                                                              | 07/20/2012    | S, O   |
| 14 Acclidinium bromide (Tudorza pressair)                                            | AstraZeneca          | Long-acting antimuscarinic agent                                                                  | Bronchospasms associated with COPD                                                            | 07/23/2012    | S      |
| 15 Cobicistat; Elvitegravir; Emtricitabine; Tenofovir disoproxil fumarate (Stribild) | Gilead Sciences      | Cytochrome P450 inhibitor; HIV-1 integrase inhibitor; NRTI; Acyclic nucleoside phosphonate analog | HIV-1 infection                                                                               | 08/27/2012    | S      |
| 16 Linaclotide (Linzess)                                                             | Allergan             | Guanylyl cyclase C agonist                                                                        | Irritable bowel syndrome with constipation; Chronic idiopathic constipation                   | 08/31/2012    | S      |
| 17 Enzalutamide (Xtandi)                                                             | Astellas             | Androgen receptor inhibitor                                                                       | Metastatic castration-resistant prostate cancer                                               | 08/31/2012    | P      |
| 18 Bosutinib monohydrate (Bosulif)                                                   | Pfizer               | BCR-ABL inhibitor; SRC family kinase inhibitor                                                    | Chronic, accelerated or blast phase Ph <sup>+</sup> chronic myelogenous leukemia              | 09/04/2012    | S, O   |
| 19 Teriflunomide (Aubagio)                                                           | Sanofi               | Dihydroorotate dehydrogenase inhibitor                                                            | Relapsing forms of multiple sclerosis                                                         | 09/12/2012    | S      |
| 20 Choline C-11                                                                      | MCPRF                | <sup>11</sup> C labelled choline analog, radioactive diagnostic agent                             | Diagnostic agent for imaging of patients with suspected prostate cancer recurrence            | 09/12/2012    | P      |
| 21 Regorafenib (Stivarga)                                                            | Bayer                | Multi-target TKI (RET, VEGFRs, KIT, PDGFRα/β, FGFR1/2, RAF1, BRAFWT, and BRAFV <sup>600E</sup> )  | Metastatic colorectal cancer                                                                  | 09/27/2012    | P      |
| 22 Perampanel (Fycompa)                                                              | Eisai                | Non-competitive ionotropic AMPA glutamate receptor antagonist                                     | Partial-onset seizures in patients with epilepsy                                              | 10/22/2012    | S      |
| 23 Omacetaxine mepesuccinate (Synribo)                                               | Teva                 | Cephalotaxine, inhibits protein chain elongation by binding the large ribosomal subunit           | Chronic or accelerated-phase chronic myeloid leukemia                                         | 10/26/2012    | S, O   |
| 24 Tofacitinib citrate (Xeljanz)                                                     | Pfizer               | JAK inhibitor                                                                                     | Severely active rheumatoid arthritis                                                          | 11/06/2012    | S      |
| 25 Cabozantinib S-malate (Cometriq)                                                  | Exelixis             | Multi-target TKI (VEGFRs, MET, RET, FLT3, KIT, TIE2, and AXL)                                     | Progressive, metastatic medullary thyroid cancer                                              | 11/29/2012    | P, O   |
| 26 Pasireotide diaspertate (Signifor)                                                | Recordati Rare       | Somatostatin analog                                                                               | Cushing's disease                                                                             | 12/14/2012    | P, O   |
| 27 Ponatinib HCl (Iclusig)                                                           | Takeda               | Multi-kinase inhibitor (BCR-ABL, KIT, RET and FLT3)                                               | Chronic, accelerated or blast-phase chronic myeloid leukemia                                  | 12/14/2012    | P, O   |
| 28 Teduglutide recombinant (Gattex kit)                                              | NPS Pharms           | Glucagon-like peptide-2 (GLP-2) analog                                                            | Short bowel syndrome                                                                          | 12/21/2012    | S, O   |
| 29 Lomitapide mesylate (Juxtapid)                                                    | Amryt                | Microsomal triglyceride transfer protein inhibitor                                                | Homozygous familial hypercholesterolemia                                                      | 12/21/2012    | S, O   |
| 30 Apixaban (Eliquis)                                                                | Bristol-Myers Squibb | Factor Xa inhibitor                                                                               | Stroke and systemic embolism in patients with non-valvular atrial fibrillation                | 12/28/2012    | P      |
| 31 Bedaquiline fumarate (Sirturo)                                                    | Janssen Therap       | Diarylquinoline antimycobacterial                                                                 | Pulmonary multidrug-resistant tuberculosis                                                    | 12/28/2012    | P, O   |
| 32 Crofelemer (Mytesi)                                                               | Napo Pharms          | CFTR and CaCC channels inhibitor                                                                  | HIV-associated diarrhea                                                                       | 12/31/2012    | P      |
| <b>2012 Biologics license applications = 7</b>                                       |                      |                                                                                                   |                                                                                               |               |        |
| 1 Glucarpidase (Voraxaze)                                                            | BTG International    | Recombinant carboxypeptidase G2                                                                   | Toxic plasma methotrexate concentrations in patients with delayed methotrexate clearance      | 01/17/2012    | P, O   |
| 2 Taliglucerase alfa (Elelyso)                                                       | Pfizer               | Recombinant human lysosomal enzyme β-glucocerebrosidase, produced in carrot cells                 | Gaucher's disease                                                                             | 05/01/2012    | S, O   |
| 3 Pertuzumab (Perjeta)                                                               | Genentech            | HER2-directed mAb                                                                                 | HER2-positive metastatic breast cancer                                                        | 06/08/2012    | P      |
| 4 Ziv-aflibercept (Zaltrap)                                                          | Sanofi               | Soluble receptor decoy that binds VEGF-A, VEGF-B, and PlGF                                        | Metastatic colorectal cancer                                                                  | 08/03/2012    | P      |



## Supplementary data: Table 1 – FDA-approved drugs (Continued)

| Drug (brand name)                              | Sponsor               | Properties                                        | Indication                                                    | Approval date | Review |
|------------------------------------------------|-----------------------|---------------------------------------------------|---------------------------------------------------------------|---------------|--------|
| <b>2012</b> Biologics license applications = 7 |                       |                                                   |                                                               |               |        |
| 5 Tbo-Filgrastim (Neutroval)                   | Sicor Biotech         | Methionyl human G-CSF                             | Severe neutropaenia in patients with non-myeloid malignancies | 08/29/2012    | S      |
| 6 Ocriplasmin (Jetrea)                         | Thrombogenics         | Recombinant truncated form of human plasmin       | Symptomatic vitreomacular adhesion                            | 10/17/2012    | P      |
| 7 Raxibacumab                                  | Human Genome Sciences | Human mAb against <i>Bacillus anthracis</i> toxin | Anthrax                                                       | 12/14/2012    | P, O   |

## Supplementary data: Table 1 – FDA-approved drugs (Continued)

| Drug (brand name)                                             | Sponsor              | Properties                                                                                          | Indication                                                                                                                                | Approval date | Review |
|---------------------------------------------------------------|----------------------|-----------------------------------------------------------------------------------------------------|-------------------------------------------------------------------------------------------------------------------------------------------|---------------|--------|
| <b>2013 New molecular entities = 25</b>                       |                      |                                                                                                     |                                                                                                                                           |               |        |
| 1 Alogliptin benzoate (Nesina)                                | Takeda               | DPP4 inhibitor                                                                                      | Type 2 diabetes                                                                                                                           | 01/25/2013    | S      |
| 2 Mipomersen sodium (Kynamro)                                 | Kastle Theraps       | Oligonucleotide inhibitor of apolipoprotein B100 synthesis                                          | Homozygous familial hypercholesterolemia                                                                                                  | 01/29/2013    | S, O   |
| 3 Pomalidomide (Pomalyst)                                     | Celgene              | Thalidomide analog, immunomodulatory antineoplastic agent                                           | Multiple myeloma                                                                                                                          | 02/08/2013    | S, O   |
| 4 Ospemifene (Osphena)                                        | Duchesnay            | Estrogen receptor modulator                                                                         | Moderate to severe dyspareunia due to menopause                                                                                           | 02/26/2013    | S      |
| 5 Technetium TC 99m tilmanocept (Lymphoseek kit)              | Cardinal Health 414  | <sup>99m</sup> Tc labelled radioactive diagnostic agent                                             | Lymphatic mapping in patients with breast cancer or melanoma                                                                              | 03/13/2013    | S      |
| 6 Gadoterate meglumine (Dotarem)                              | Guerbet              | Gadolinium-based contrast agent                                                                     | Contrast agent to visualize disruption of the blood-brain barrier                                                                         | 03/20/2013    | P      |
| 7 Dimethyl fumarate (Tecfidera)                               | Biogen               | MOA unknown; activates NRF2 pathway                                                                 | Relapsing forms of multiple sclerosis                                                                                                     | 03/27/2013    | S      |
| 8 Canagliflozin (Invokana)                                    | Janssen Pharms       | Sodium-dependent glucose cotransporter 2 (SGLT2) inhibitor                                          | Type 2 diabetes                                                                                                                           | 03/29/2013    | S      |
| 9 Fluticasone furoate; Vilanterol trifenate (Breo ellipta)    | GlaxoSmithKline      | Corticosteroid plus long-acting $\beta$ 2-adrenergic agonist                                        | Chronic obstructive pulmonary disease                                                                                                     | 05/10/2013    | S      |
| 10 Radium Ra-223 dichloride (Xofigo)                          | Bayer                | $\alpha$ -particle-emitting radioactive therapeutic                                                 | Castration-resistant prostate cancer                                                                                                      | 05/15/2013    | P      |
| 11 Dabrafenib mesylate (Tafinlar)                             | Novartis             | Kinase inhibitor with activity against BRAF <sup>V600E/D/K</sup> , wild-type BRAF and other kinases | Unresectable or metastatic melanoma with BRAF <sup>V600E</sup> mutation                                                                   | 05/29/2013    | S, O   |
| 12 Trametinib dimethyl sulfoxide (Mekinist)                   | Novartis             | MEK1 and MEK2 kinase inhibitor                                                                      | Unresectable or metastatic melanoma with BRAF <sup>V600E</sup> mutation                                                                   | 05/29/2013    | S, O   |
| 13 Afatinib dimaleate (Gilotrif)                              | Boehringer Ingelheim | EGFR, HER2, and HER4 inhibitor                                                                      | Metastatic NSCLC with EGFR exon 19 deletions or exon 21 (L858R) substitution mutations                                                    | 07/12/2013    | P, O   |
| 14 Dolutegravir sodium (Tivicay)                              | Viiv Hlthcare        | HIV-1 integrase strand transfer inhibitor                                                           | HIV-1 infection in adults and children, in combination with other antiretroviral agents                                                   | 08/12/2013    | P      |
| 15 Vortioxetine HBr (Brintellix)                              | Takeda               | Serotonin reuptake inhibitor                                                                        | Major depressive disorder                                                                                                                 | 09/30/2013    | S      |
| 16 Bazedoxifene acetate; Estrogens, conjugated (Duavee)       | Wyeth Pharms         | Conjugated estrogens with an estrogen receptor modulator                                            | Moderate to severe vasomotor symptoms associated with menopause and prevention of postmenopausal osteoporosis                             | 10/03/2013    | S      |
| 17 Riociguat (Adempas)                                        | Bayer                | Soluble guanylyl cyclase stimulator                                                                 | Persistent or recurrent chronic thromboembolic pulmonary hypertension and pulmonary arterial hypertension                                 | 10/08/2013    | P, O   |
| 18 Macitentan (Opsumit)                                       | Actelion             | Endothelin receptor antagonist                                                                      | Pulmonary arterial hypertension                                                                                                           | 10/18/2013    | S, O   |
| 19 Flutemetamol F-18 (Vizamyl)                                | GE Healthcare        | <sup>18</sup> F labelled Radioactive diagnostic agent                                               | PET imaging of the brain to estimate $\beta$ -amyloid neuritic plaque density in patients who are being evaluated for Alzheimer's disease | 10/25/2013    | S      |
| 20 Eslicarbazepine acetate (Aptiom)                           | Sunovion Pharms      | MOA unknown, but thought to involve voltage-gated sodium channels                                   | Partial-onset seizures                                                                                                                    | 11/08/2013    | S      |
| 21 Ibrutinib (Imbruvica)                                      | Pharmacyclics        | Bruton's tyrosine kinase inhibitor                                                                  | Mantle cell lymphoma                                                                                                                      | 11/13/2013    | P, O   |
| 22 Luliconazole (Luzu)                                        | Bausch               | Azole antifungal, MOA unknown, but thought to inhibit the enzyme lanosterol demethylase             | Interdigital tinea pedis, tinea cruris and tinea corporis caused by <i>Trichophyton rubrum</i> and <i>Epidermophyton floccosum</i>        | 11/14/2013    | S      |
| 23 Simeprevir sodium (Olysio)                                 | Janssen Prods        | HCV NS3/4A protease inhibitor                                                                       | Chronic HCV infection, as a component of a combination antiviral treatment regimen                                                        | 11/22/2013    | P      |
| 24 Sofosbuvir (Sovaldi)                                       | Gilead Sciences      | HCV nucleotide analogue NS5B polymerase inhibitor                                                   | Chronic HCV infection, as a component of a combination antiviral treatment regimen                                                        | 12/06/2013    | P      |
| 25 Umeclidinium bromide; Vilanterol trifenate (Anoro ellipta) | GlaxoSmithKline      | Anticholinergic plus long-acting $\beta$ 2-adrenergic agonist                                       | Chronic obstructive pulmonary disease                                                                                                     | 12/18/2013    | S      |
| <b>2013 Biologics license applications = 2</b>                |                      |                                                                                                     |                                                                                                                                           |               |        |
| 1 Adu-trastuzumab emtansine (Kadcyla)                         | Genentech            | HER2-directed ADC                                                                                   | HER2-positive metastatic breast cancer                                                                                                    | 02/22/2013    | P      |
| 2 Obinutuzumab (Gazyva)                                       | Genentech            | CD20-directed mAb                                                                                   | Previously untreated chronic lymphocytic leukemia                                                                                         | 11/01/2013    | P, O   |

## Supplementary data: Table 1 – FDA-approved drugs (Continued)

| Drug (brand name)                                                                     | Sponsor              | Properties                                                                                                             | Indication                                                                                               | Approval date | Review |
|---------------------------------------------------------------------------------------|----------------------|------------------------------------------------------------------------------------------------------------------------|----------------------------------------------------------------------------------------------------------|---------------|--------|
| <b>2014 New molecular entities = 30</b>                                               |                      |                                                                                                                        |                                                                                                          |               |        |
| 1 Dapagliflozin (Farxiga)                                                             | AstraZeneca          | Sodium-dependent glucose cotransporter 2 (SGLT2) inhibitor                                                             | Type 2 diabetes                                                                                          | 01/08/2014    | S      |
| 2 Tasimelteon (Hetlioz)                                                               | Vanda Pharms         | Melatonin-receptor agonist                                                                                             | Non-24-hour sleep-wake disorder                                                                          | 01/31/2014    | P, O   |
| 3 Droxidopa (Northera)                                                                | Lundbeck             | Synthetic amino-acid precursor of noradrenaline; $\alpha$ -adrenergic receptors agonist                                | Light-headedness in patients with neurogenic orthostatic hypotension                                     | 02/18/2014    | P, O   |
| 4 Florbetaben F-18 (Neuraceq)                                                         | Life Molecular       | $^{18}\text{F}$ labelled radioactive diagnostic agent                                                                  | Imaging of the brain to estimate density of neuritic amyloid- $\beta$ plaques                            | 03/19/2014    | S      |
| 5 Miltefosine (Impavido)                                                              | Knight Theraps       | Antileishmanial agent, MOA unknown                                                                                     | Leishmaniasis                                                                                            | 03/19/2014    | P, O   |
| 6 Apremilast (Otezla)                                                                 | Amgen                | Phosphodiesterase 4 (PDE4) inhibitor                                                                                   | Psoriatic arthritis and plaque psoriasis                                                                 | 03/21/2014    | S      |
| 7 Ceritinib (Zykadia)                                                                 | Novartis             | Multi-target TKI (ALK, IGF1R, INSR, and ROS1)                                                                          | ALK-positive metastatic NSCLC                                                                            | 04/29/2014    | P, O   |
| 8 Vorapaxar sulfate (Zontivity)                                                       | Xspire Pharma        | Protease-activated receptor 1 antagonist                                                                               | Thrombotic cardiovascular events                                                                         | 05/08/2014    | S      |
| 9 Dalbavancin HCl (Dalvance)                                                          | Allergan             | Semi-synthetic lipoglycopeptide, bacterial cell wall biosynthesis inhibitor                                            | Acute bacterial skin and skin structure infections (ABSSSI)                                              | 05/23/2014    | P      |
| 10 Efinacozole (Jublia)                                                               | Bausch               | Azole antifungal, fungal lanosterol 14 $\alpha$ -demethylase inhibitor                                                 | Onychomycosis of the toenails                                                                            | 06/06/2014    | S      |
| 11 Tedizolid phosphate (Sivextro)                                                     | Cubist               | Oxazolidinone-class antibacterial, bacterial protein synthesis inhibitor                                               | Acute bacterial skin and skin structure infections (ABSSSI)                                              | 06/20/2014    | P      |
| 12 Belinostat (Beleodaq)                                                              | Acrotech             | Histone-deacetylase inhibitor                                                                                          | Peripheral T-cell lymphoma                                                                               | 07/03/2014    | P, O   |
| 13 Tavaborole (Kerydin)                                                               | Anacor Pharms        | Oxaborole antifungal, cellular protein synthesis inhibitor                                                             | Onychomycosis of the toenails                                                                            | 07/07/2014    | S      |
| 14 Idelalisib (Zydelig)                                                               | Gilead Sciences      | PI3K $\delta$ inhibitor                                                                                                | Chronic lymphocytic leukaemia (CLL), B-cell non-Hodgkin's lymphoma, and small lymphocytic lymphoma (SLL) | 07/23/2014    | P, O   |
| 15 Olodaterol HCl (Striverdi respimat)                                                | Boehringer Ingelheim | Long-acting $\beta$ 2-adrenoceptor agonist                                                                             | Chronic obstructive pulmonary disease (COPD)                                                             | 07/31/2014    | S      |
| 16 Empagliflozin (Jardiance)                                                          | Boehringer Ingelheim | Sodium-dependent glucose cotransporter 2 (SGLT2) inhibitor                                                             | Type 2 diabetes                                                                                          | 08/01/2014    | S      |
| 17 Oritavancin diphosphate (Orbactiv)                                                 | Melinta Therap       | Semi-synthetic lipoglycopeptide, bacterial cell wall biosynthesis inhibitor                                            | Acute bacterial skin and skin structure infections (ABSSSI)                                              | 08/06/2014    | P      |
| 18 Suvorexant (Belsomra)                                                              | Merck & Co           | Orexin-receptor antagonist                                                                                             | Insomnia                                                                                                 | 08/13/2014    | S      |
| 19 Eliglustat tartrate (Cerdelga)                                                     | Genzyme              | Glucosylceramide-synthase inhibitor                                                                                    | Gaucher's disease                                                                                        | 08/19/2014    | P, O   |
| 20 Naloxegol oxalate (Movantik)                                                       | Redhill              | Opioid-receptor antagonist                                                                                             | Opioid-induced constipation                                                                              | 09/16/2014    | S      |
| 21 Sulfur hexafluoride lipid-type A microspheres (Lumason)                            | Bracco               | Ultrasound contrast agent                                                                                              | Cardiovascular imaging                                                                                   | 10/10/2014    | S      |
| 22 Netupitant; Palonosetron HCl (Aknzeo)                                              | Helsinn Hlthcare     | NK1-receptor antagonist plus 5-HT $_3$ receptor antagonist                                                             | Chemotherapy-related nausea                                                                              | 10/10/2014    | S      |
| 23 Ledipasvir; Sofosbuvir (Harvoni)                                                   | Gilead Sciences      | NS5A inhibitor plus HCV nucleotide-analog NS5B-polymerase inhibitor                                                    | Genotype 1 HCV                                                                                           | 10/10/2014    | P      |
| 24 Pirfenidone (Esbriet)                                                              | Genentech            | MOA unknown                                                                                                            | Idiopathic pulmonary fibrosis (IPF)                                                                      | 10/15/2014    | P, O   |
| 25 Nintedanib esylate (Ofev)                                                          | Boehringer Ingelheim | Multi-kinase inhibitor (PDGFRs, FGFRs, VEGFRs, and FLT3)                                                               | Idiopathic pulmonary fibrosis (IPF)                                                                      | 10/15/2014    | P, O   |
| 26 Finafloxacin (Xtoro)                                                               | Merlion Pharms       | Fluoroquinolone antimicrobial                                                                                          | Acute otitis externa (Swimmer's ear)                                                                     | 12/17/2014    | P      |
| 27 Olaparib (Lynparza)                                                                | AstraZeneca          | PARP inhibitor                                                                                                         | Advanced BRCA-mutated ovarian cancer                                                                     | 12/19/2014    | P, O   |
| 28 Peramivir (Rapivab)                                                                | BioCryst             | Neuraminidase inhibitor                                                                                                | Influenza infection                                                                                      | 12/19/2014    | S      |
| 29 Dasabuvir sodium; Ombitasvir; Paritaprevir; Ritonavir (Viekira pak [(Copackaged)]) | AbbVie               | NS5A inhibitor plus NS3A/4A-protease inhibitor plus non-nucleoside NS5B palm-polymerase inhibitor plus CYP3A inhibitor | Chronic HCV genotype 1 infection                                                                         | 12/19/2014    | P      |
| 30 Ceftolozane sulfate; Tazobactam sodium (Zerbaxa)                                   | Cubist Pharms        | Cephalosporin antibacterial plus $\beta$ -lactamase inhibitor                                                          | Complicated intra-abdominal infections and complicated urinary tract infections                          | 12/19/2014    | P      |
| <b>2014 Biologics license applications = 11</b>                                       |                      |                                                                                                                        |                                                                                                          |               |        |
| 1 Elosulfate alfa (Vimizim)                                                           | BioMarin Pharm       | Recombinant human lysosomal glycosaminoglycan-specific enzyme                                                          | Mucopolysaccharidosis type IV A                                                                          | 02/14/2014    | P, O   |
| 2 Metreleptin (Mylept)                                                                | Aegerion             | Recombinant analog of the human hormone leptin                                                                         | Leptin deficiency in patients with congenital or acquired generalized lipodystrophy                      | 02/24/2014    | P, O   |
| 3 Albiglutide (Tanzeum)                                                               | GlaxoSmithKline      | Glucagon-like peptide 1 (GLP1) receptor agonist                                                                        | Type 2 diabetes                                                                                          | 04/15/2014    | S      |
| 4 Ramucirumab (Cyramza)                                                               | Eli Lilly & Co       | VEGFR2-directed mAb                                                                                                    | Gastric cancer                                                                                           | 04/21/2014    | P, O   |
| 5 Siltuximab (Sylvant)                                                                | Janssen Biotech      | Interleukin-6 (IL-6)-directed mAb                                                                                      | Multicentric Castlemans disease                                                                          | 04/23/2014    | P, O   |
| 6 Vedolizumab (Entyvio)                                                               | Takeda               | Integrin receptor antagonist                                                                                           | Ulcerative colitis and Crohn's disease                                                                   | 05/20/2014    | P      |
| 7 Peginterferon $\beta$ -1a (Plegridy)                                                | Biogen Idec          | Long-acting interferon $\beta$ -1a                                                                                     | Relapsing multiple sclerosis                                                                             | 08/15/2014    | S      |

## Supplementary data: Table 1 – FDA-approved drugs (Continued)

| Drug (brand name)                                      | Sponsor              | Properties                                                                                                        | Indication                                          | Approval date | Review |
|--------------------------------------------------------|----------------------|-------------------------------------------------------------------------------------------------------------------|-----------------------------------------------------|---------------|--------|
| <b>2014</b> <b>Biologics license applications = 11</b> |                      |                                                                                                                   |                                                     |               |        |
| 8 Pembrolizumab (Keytruda)                             | Merck & Co           | PD1-directed mAb                                                                                                  | Metastatic melanoma                                 | 09/04/2014    | P, O   |
| 9 Dulaglutide (Trulicity)                              | Eli Lilly & Co       | GLP1-receptor agonist, recombinant dimeric fusion protein consisting of GLP1 peptide and Fc portion of human IgG4 | Type 2 diabetes                                     | 09/18/2014    | S      |
| 10 Blinatumomab (Blincyto)                             | Amgen                | CD19- and CD3-bispecific mAb                                                                                      | B-cell precursor acute lymphoblastic leukemia (ALL) | 12/03/2014    | P, O   |
| 11 Nivolumab (Opdivo)                                  | Bristol-Myers Squibb | PD1-directed mAb                                                                                                  | Unresectable or metastatic melanoma                 | 12/22/2014    | P, O   |

## Supplementary data: Table 1 – FDA-approved drugs (Continued)

| Drug (brand name)                                                                    | Sponsor              | Properties                                                                                                   | Indication                                                                      | Approval date | Review |
|--------------------------------------------------------------------------------------|----------------------|--------------------------------------------------------------------------------------------------------------|---------------------------------------------------------------------------------|---------------|--------|
| <b>2015 New molecular entities = 32</b>                                              |                      |                                                                                                              |                                                                                 |               |        |
| 1 Edoxaban tosylate (Savaysa)                                                        | Daichi Sankyo        | Factor Xa inhibitor                                                                                          | Risk of stroke and systemic embolism in NVAf, and deep vein thrombosis          | 01/08/2015    | S      |
| 2 Palbociclib (Ibrance)                                                              | Pfizer               | Cyclin-dependent kinase 4/6 (CDK4/6) inhibitor                                                               | HER2-negative and HR-positive advanced or metastatic breast cancer              | 02/03/2015    | P      |
| 3 Lenvatinib mesylate (Lenvima)                                                      | Eisai                | Multi-target TKI (VEGFRs, FGFRs, PDGFR $\alpha$ , RET, and KIT)                                              | Thyroid cancer                                                                  | 02/13/2015    | P, O   |
| 4 Panobinostat lactate (Farydak)                                                     | Secura               | Histone deacetylase inhibitor                                                                                | Multiple myeloma                                                                | 02/23/2015    | P, O   |
| 5 Avibactam sodium; Ceftazidime (Avycaz)                                             | Allergan             | $\beta$ -lactamase inhibitor plus cephalosporin                                                              | Complicated intra-abdominal infections and complicated urinary tract infections | 02/25/2015    | P      |
| 6 Isavuconazonium sulfate (Cresemba)                                                 | Astellas             | Azole antifungal, sterol 14- $\alpha$ -demethylase inhibitor                                                 | Invasive aspergillosis and mucormycosis                                         | 03/06/2015    | P, O   |
| 7 Cholic acid (Cholbam)                                                              | Travere              | Primary bile acid                                                                                            | Bile acid synthesis disorders and peroxisomal disorders                         | 03/17/2015    | P, O   |
| 8 Ivabradine HCl (Corlanor)                                                          | Amgen                | Hyperpolarization-activated cyclic nucleotide-gated channel blocker                                          | Chronic heart failure                                                           | 04/15/2015    | P      |
| 9 Deoxycholic acid (Kybella)                                                         | Kythera Biopharms    | Cytolytic drug                                                                                               | Fat below the chin                                                              | 04/29/2015    | S      |
| 10 Eluxadolone (Viberzi)                                                             | Allergan Holdings    | $\mu$ -opioid receptor agonist                                                                               | Irritable bowel syndrome                                                        | 05/27/2015    | P      |
| 11 Cangrelor (Kengreal)                                                              | Chiesi               | P2Y12 platelet inhibitor                                                                                     | Myocardial infarction, repeat coronary revascularization, and stent thrombosis  | 06/22/2015    | S      |
| 12 Ivacaftor; Lumacaftor (Orkambi)                                                   | Vertex Pharms        | CFTR potentiator plus CFTR corrector                                                                         | Cystic fibrosis in patients with homozygous $\Delta$ F508 CFTR mutation         | 07/02/2015    | P, O   |
| 13 Sacubitril; Valsartan (Entresto)                                                  | Novartis             | Neprilysin inhibitor plus angiotensin II receptor blocker                                                    | Chronic heart failure                                                           | 07/07/2015    | P      |
| 14 Brexpiprazole (Rexulti)                                                           | Otsuka               | Atypical antipsychotic, 5-HT $_{1A}$ and dopamine D2 receptors agonist, and 5-HT $_{2A}$ receptor antagonist | Major depressive disorder (MDD) and schizophrenia                               | 07/10/2015    | S      |
| 15 Sonidegib phosphate (Odomzo)                                                      | Sun Pharma Global    | Smoothed inhibitor                                                                                           | Basal cell carcinoma                                                            | 07/24/2015    | S      |
| 16 Daclatasvir 2HCl (Daklinza)                                                       | Bristol-Myers Squibb | NS5A inhibitor                                                                                               | HCV infection                                                                   | 07/24/2015    | P      |
| 17 Flibanserin (Addyi)                                                               | Sprout Pharms        | Serotonin receptor modulator                                                                                 | Hypoactive sexual desire disorder                                               | 08/18/2015    | S      |
| 18 Rolapitant HCl (Varubi)                                                           | Tersera              | Neurokinin 1 receptor antagonist                                                                             | Nausea and vomiting associated with chemotherapy                                | 09/01/2015    | S      |
| 19 Uridine triacetate (Xuriden)                                                      | Wellstat Therap      | Pyrimidine analog, synthetic uridine prodrug                                                                 | Hereditary orotic aciduria                                                      | 09/04/2015    | P, O   |
| 20 Cariprazine HCl (Vraylar)                                                         | Allergan             | Atypical antipsychotic, 5-HT $_{1A}$ and dopamine D2 receptors agonist, and 5-HT $_{2A}$ receptor antagonist | Schizophrenia and bipolar 1 disorder                                            | 09/17/2015    | S      |
| 21 Tipiracil HCl; Trifluridine (Lonsurf)                                             | Taiho Oncology       | Thymidine phosphorylase inhibitor plus a nucleoside metabolic inhibitor                                      | Colorectal cancer                                                               | 09/22/2015    | S      |
| 22 Aripiprazole lauroxil (Aristada)                                                  | Alkermes             | Atypical antipsychotic, 5-HT $_{1A}$ and dopamine D2 receptors agonist, and 5-HT $_{2A}$ receptor antagonist | Schizophrenia                                                                   | 10/05/2015    | S      |
| 23 Patiromer sorbitex calcium (Veltassa)                                             | Vifor Pharma         | Potassium binder                                                                                             | Hyperkalemia                                                                    | 10/21/2015    | S      |
| 24 Trabectedin (Yondelis)                                                            | Janssen Prods        | Alkylating drug, interacts with the minor groove of DNA                                                      | Liposarcoma or leiomyosarcoma                                                   | 10/23/2015    | P, O   |
| 25 Cobicistat; Elvitegravir; Emtricitabine; Tenofovir alafenamide fumarate (Genvoya) | Gilead Sciences      | INSTI plus CYP3A inhibitor plus two nucleoside analog reverse transcriptase inhibitors                       | HIV-1 infection                                                                 | 11/05/2015    | S      |
| 26 Cobimetinib fumarate (Cotellic)                                                   | Genentech            | MEK inhibitor                                                                                                | Melanoma with <i>BRAF</i> <sup>V600E/K</sup> mutations                          | 11/10/2015    | P, O   |
| 27 Osimertinib mesylate (Tagrisso)                                                   | AstraZeneca          | EGFR inhibitor                                                                                               | NSCLC with <i>EGFR</i> <sup>T790M</sup> mutations                               | 11/13/2015    | P, O   |
| 28 Ixazomib citrate (Ninlaro)                                                        | Takeda               | Oral proteasome inhibitor                                                                                    | Multiple myeloma                                                                | 11/20/2015    | P, O   |
| 29 Alectinib HCl (Alecensa)                                                          | Roche                | ALK inhibitor                                                                                                | Non-small-cell lung cancer (NSCLC)                                              | 12/11/2015    | P, O   |
| 30 Sugammadex sodium (Bridion)                                                       | Merck & Co           | Modified $\gamma$ -cyclodextrin                                                                              | Reversal of neuromuscular blockade during surgery                               | 12/15/2015    | P      |
| 31 Selexipag (Uptravi)                                                               | Actelion             | Prostacyclin receptor agonist                                                                                | Pulmonary arterial hypertension                                                 | 12/21/2015    | S, O   |
| 32 Lesinurad (Zurampic)                                                              | Ironwood Pharms      | Uric acid transporter 1 (URAT1) inhibitor                                                                    | Gout                                                                            | 12/22/2015    | S      |
| <b>2015 Biologics license applications = 13</b>                                      |                      |                                                                                                              |                                                                                 |               |        |
| 1 Secukinumab (Cosentyx)                                                             | Novartis             | Interleukin-17A (IL-17A)-directed mAb                                                                        | Plaque psoriasis                                                                | 01/21/2015    | S      |
| 2 Parathyroid hormone (Natpara)                                                      | NPS Pharma           | Human parathyroid hormone (PTH) analog                                                                       | Hypocalcemia in patients with hypoparathyroidism                                | 01/23/2015    | S, O   |
| 3 Dinutuximab (Unituxin)                                                             | United Therap        | GD2-directed mAb                                                                                             | High-risk neuroblastoma                                                         | 03/10/2015    | P, O   |
| 4 Alirocumab (Praluent)                                                              | Sanofi               | Proprotein convertase subtilisin kexin type 9 (PCSK9) inhibitor                                              | Heterozygous familial hypercholesterolemia                                      | 07/24/2015    | P      |
| 5 Evolocumab (Repatha)                                                               | Amgen                | PCSK9 inhibitor                                                                                              | Primary hyperlipidemia                                                          | 08/27/2015    | S, O   |
| 6 Insulin degludec (Tresiba)                                                         | Novo Nordisk         | Recombinant human insulin [Lys (B28), Pro (B29)]                                                             | Type 1 & 2 diabetes                                                             | 09/25/2015    | S      |

## Supplementary data: Table 1 – FDA-approved drugs (Continued)

| Drug (brand name)                               | Sponsor              | Properties                                                                                 | Indication                                      | Approval date | Review |
|-------------------------------------------------|----------------------|--------------------------------------------------------------------------------------------|-------------------------------------------------|---------------|--------|
| <b>2015 Biologics license applications = 13</b> |                      |                                                                                            |                                                 |               |        |
| 7 Idarucizumab (Praxbind)                       | Boehringer Ingelheim | Humanized anti-dabigatran IgG1κ Fab                                                        | Reversal of anticoagulant effects of dabigatran | 10/16/2015    | P, O   |
| 8 Asfotase alfa (Strensiq)                      | Strensiq             | Human recombinant tissue-nonspecific alkaline phosphatase-Fc-deca-aspartate fusion protein | Hypophosphatasia                                | 10/23/2015    | P, O   |
| 9 Mepolizumab (Nucala)                          | GlaxoSmithKline      | Interleukin-5 (IL-5)-directed mAb                                                          | Severe asthma                                   | 11/04/2015    | S      |
| 10 Daratumumab (Darzalex)                       | Janssen Biotech      | CD38-directed mAb                                                                          | Multiple myeloma                                | 11/16/2015    | P, O   |
| 11 Necitumumab (Portrazza)                      | Eli Lilly & Co       | EGFR-directed mAb                                                                          | Non-small-cell lung cancer (NSCLC)              | 11/24/2015    | S, O   |
| 12 Elotuzumab (Empliciti)                       | Bristol-Myers Squibb | SLAMF7-directed mAb                                                                        | Multiple myeloma                                | 11/30/2015    | P, O   |
| 13 Sebelipase alfa (Kanuma)                     | Alexion Pharm        | Recombinant human lysosomal acid lipase                                                    | Lysosomal acid lipase deficiency                | 12/08/2015    | P, O   |

## Supplementary data: Table 1 – FDA-approved drugs (Continued)

| Drug (brand name)                              | Sponsor             | Properties                                                                                       | Indication                                                                 | Approval date | Review |
|------------------------------------------------|---------------------|--------------------------------------------------------------------------------------------------|----------------------------------------------------------------------------|---------------|--------|
| <b>2016 New molecular entities = 15</b>        |                     |                                                                                                  |                                                                            |               |        |
| 1 Elbasvir; Grazoprevir (Zepatier)             | Merck & Co          | NS5A inhibitor plus NS3/4A protease inhibitor                                                    | HCV genotypes 1 and 4                                                      | 01/28/2016    | P      |
| 2 Brivaracetam (Briviact)                      | UCB                 | Anticonvulsant with unknown MOA, binds to SV2A                                                   | Partial-onset seizures                                                     | 02/18/2016    | S      |
| 3 Defibrotide sodium (Defitelio)               | Jazz                | Profibrinolytic                                                                                  | Hepatic veno-occlusive disease                                             | 03/30/2016    | P, O   |
| 4 Venetoclax (Venclexta)                       | AbbVie              | BCL-2 inhibitor                                                                                  | Chronic lymphocytic leukemia                                               | 04/11/2016    | P, O   |
| 5 Pimavanserin tartrate (Nuplazid)             | Acadia Pharms       | Atypical antipsychotic, 5-HT <sub>2A</sub> receptor antagonist                                   | Hallucinations and delusions associated with Parkinson's disease psychosis | 04/29/2016    | P      |
| 6 Obeticholic acid (Ocaliva)                   | Intercept Pharms    | Bile acid analog and farnesoid X receptor agonist                                                | Primary biliary cholangitis                                                | 05/27/2016    | P, O   |
| 7 Fluciclovine F-18 (Axumin)                   | Blue Earth          | <sup>18</sup> F labelled radioactive diagnostic agent                                            | Imaging diagnosis of suspected prostate cancer recurrence                  | 05/27/2016    | P      |
| 8 Gallium dotatate Ga-68 (Netspot)             | AAA USA Inc         | <sup>68</sup> Ga labelled radioactive diagnostic                                                 | Imaging diagnosis of neuroendocrine tumors                                 | 06/01/2016    | P, O   |
| 9 Sofosbuvir; Velpatasvir (Epclusa)            | Gilead Sciences     | Nucleotide analog NS5B polymerase inhibitor plus HCV NS5A inhibitor                              | HCV genotypes 1-6                                                          | 06/28/2016    | P      |
| 10 Lifitegrast (Xiidra)                        | Novartis            | Tetrahydroisoquinoline derivative and lymphocyte function-associated antigen-1 (LFA1) antagonist | Dry eye disease                                                            | 07/11/2016    | P      |
| 11 Lixisenatide (Adlyxin)                      | Sanofi              | Glucagon-like peptide-1 (GLP-1) receptor agonist                                                 | Type 2 diabetes                                                            | 07/27/2016    | S      |
| 12 Eteplirsen (Exondys 51)                     | Sarepta Theraps     | Antisense oligonucleotide designed to target dystrophin pre-mRNA                                 | Duchenne muscular dystrophy                                                | 09/19/2016    | P, O   |
| 13 Crisaborole (Eucrisa)                       | Anacor Pharms       | PDE4 inhibitor                                                                                   | Atopic dermatitis                                                          | 12/14/2016    | S      |
| 14 Rucaparib camsylate (Rubraca)               | Clovis Oncology     | PARP inhibitor                                                                                   | BRCA-positive ovarian cancer                                               | 12/19/2016    | P, O   |
| 15 Nusinersen sodium (Spinraza)                | Biogen Idec         | Antisense oligonucleotide designed to target SMN2 pre-mRNA                                       | Spinal muscular atrophy                                                    | 12/23/2016    | P, O   |
| <b>2016 Biologics license applications = 7</b> |                     |                                                                                                  |                                                                            |               |        |
| 1 Obiltoximab (Anthem)                         | Elusys Therapeutics | Anthrax toxin-directed mAb                                                                       | Anthrax                                                                    | 03/18/2016    | S, O   |
| 2 Ixekizumab (Taltz)                           | Eli Lilly & Co      | Interleukin-17A (IL-17A)-directed mAb                                                            | Plaque psoriasis                                                           | 03/22/2016    | S      |
| 3 Reslizumab (Cinqair)                         | Teva                | Interleukin-5 (IL-5)-directed mAb                                                                | Severe asthma                                                              | 03/23/2016    | S      |
| 4 Atezolizumab (Tecentriq)                     | Genentech           | PDL1-directed mAb                                                                                | Advanced or metastatic urothelial carcinoma                                | 05/18/2016    | P      |
| 5 Daclizumab (Zinbryta)                        | Biogen              | Interleukin-2 (IL-2)-directed mAb                                                                | Multiple sclerosis                                                         | 05/27/2016    | S      |
| 6 Olaratumab (Lartruvo)                        | Eli Lilly & Co      | PDGFR $\alpha$ -directed mAb                                                                     | Soft tissue sarcoma                                                        | 10/19/2016    | P, O   |
| 7 Bezlotoxumab (Zinplava)                      | Merck & Co          | <i>Clostridium difficile</i> toxin-directed mAb                                                  | <i>C. difficile</i> recurrence                                             | 10/21/2016    | P      |

## Supplementary data: Table 1 – FDA-approved drugs (Continued)

| Drug (brand name)                                 | Sponsor              | Properties                                                                                                | Indication                                                                            | Approval date | Review |
|---------------------------------------------------|----------------------|-----------------------------------------------------------------------------------------------------------|---------------------------------------------------------------------------------------|---------------|--------|
| <b>2017 New molecular entities = 34</b>           |                      |                                                                                                           |                                                                                       |               |        |
| 1 Plecanatide (Trulance)                          | Salix                | Guanylate cyclase C agonist                                                                               | Chronic idiopathic constipation                                                       | 01/19/2017    | S      |
| 2 Etelcalcetide (Parsabiv)                        | Kai Pharms Inc       | Calcium-sensing receptor agonist                                                                          | Secondary hyperparathyroidism in patients with chronic kidney disease on hemodialysis | 02/07/2017    | S      |
| 3 Deflazacort (Emflaza)                           | PTC Therap           | Corticosteroid                                                                                            | Duchenne muscular dystrophy                                                           | 02/09/2017    | P, O   |
| 4 Telotristat etiprate (Xermelo)                  | Tersera              | Tryptophan hydroxylase inhibitor                                                                          | Carcinoid syndrome diarrhea                                                           | 02/28/2017    | P, O   |
| 5 Ribociclib succinate (Kisqali)                  | Novartis             | CDK4/6 inhibitor                                                                                          | HR-positive, HER2-negative breast cancer                                              | 03/13/2017    | P      |
| 6 Safinamide mesylate (Xadago)                    | MDD US               | MAO-B inhibitor                                                                                           | Parkinson's disease                                                                   | 03/21/2017    | S      |
| 7 Naldemedine tosylate (Symproic)                 | BDSI                 | Opioid antagonist                                                                                         | Opioid-induced constipation                                                           | 03/23/2017    | S      |
| 8 Niraparib tosylate (Zejula)                     | GlaxoSmithKline      | Poly-ADP ribose polymerase (PARP) inhibitor                                                               | Epithelial ovarian, fallopian tube or primary peritoneal cancer                       | 03/27/2017    | P, O   |
| 9 Deutetrabenazine (Austedo)                      | Teva                 | VMAT2 inhibitor                                                                                           | Chorea associated with Huntington disease                                             | 04/03/2017    | S, O   |
| 10 Valbenazine tosylate (Ingrezza)                | Neurocrine           | VMAT2 inhibitor                                                                                           | Tardive dyskinesia                                                                    | 04/11/2017    | P      |
| 11 Abaloparatide (Tymlos)                         | Radius Health        | Parathyroid hormone-related protein                                                                       | Osteoporosis                                                                          | 04/28/2017    | S      |
| 12 Brigatinib (Alunbrig)                          | Takeda               | Multi-target TKI (ALK, EGFR, IGF1R, FLT3, and ROS1)                                                       | ALK-positive NSCLC                                                                    | 04/28/2017    | P, O   |
| 13 Midostaurin (Rydapt)                           | Novartis             | Fms-like tyrosine kinase 3 (FLT3) inhibitor                                                               | FLT3-positive acute myeloid leukemia (AML)                                            | 04/28/2017    | P, O   |
| 14 Edaravone (Radicava)                           | Mitsubishi Tanabe    | MOA unknown (Free radical scavenger)                                                                      | Amyotrophic lateral sclerosis (ALS)                                                   | 05/05/2017    | S, O   |
| 15 Delafloxacin meglumine (Baxdela)               | Melinta              | Fluoroquinolone antibacterial, bacterial DNA gyrase (topoisomerase II) and DNA topoisomerase IV inhibitor | Acute bacterial skin and skin structure infections                                    | 06/19/2017    | P      |
| 16 Betrixaban (Bevyxxa)                           | Portola Pharms       | FXa inhibitor                                                                                             | Prophylaxis of venous thromboembolism                                                 | 06/23/2017    | P      |
| 17 Neratinib maleate (Nerlynx)                    | Puma Biotech         | EGFR, HER2, and HER4 inhibitor                                                                            | HER2-overexpressed breast cancer                                                      | 07/17/2017    | S      |
| 18 Sofosbuvir; Velpatasvir; Voxilaprevir (Vosevi) | Gilead Sciences      | Nucleotide analog NS5B polymerase inhibitor plus NS5A inhibitor plus NS3/4A protease inhibitor            | HCV                                                                                   | 07/18/2017    | P      |
| 19 Enasidenib mesylate (Idhifa)                   | Celgene Corp         | IDH2 inhibitor                                                                                            | IDH2-mutated acute myeloid leukemia (AML)                                             | 08/01/2017    | P, O   |
| 20 Glecaprevir; Pibrentasvir (Mavyret)            | AbbVie               | NS3/4A protease inhibitor plus NS5A inhibitor                                                             | HCV                                                                                   | 08/03/2017    | P      |
| 21 Benznidazole                                   | Chemo Research       | Nitroimidazole antimicrobial                                                                              | Chagas disease                                                                        | 08/29/2017    | P, O   |
| 22 Meropenem; Vaborbactam (Vabomere)              | Rempex               | Carbapenem antimicrobial plus a $\beta$ -lactamase inhibitor                                              | Complicated urinary tract infections                                                  | 08/29/2017    | P      |
| 23 Copanlisib 2HCl (Aliqopa)                      | Bayer                | PI3K $\alpha$ / $\delta$ inhibitor                                                                        | Follicular lymphoma (FL)                                                              | 09/14/2017    | P, O   |
| 24 Secnidazole (Solosec)                          | Lupin                | Nitroimidazole antimicrobial                                                                              | Bacterial vaginosis                                                                   | 09/15/2017    | P      |
| 25 Abemaciclib (Verzenio)                         | Eli Lilly & Co       | CDK4/6 inhibitor                                                                                          | HR-positive, HER2-negative breast cancer                                              | 09/28/2017    | P      |
| 26 Acalabrutinib (Calquence)                      | AstraZeneca          | BTK inhibitor                                                                                             | Mantle cell lymphoma                                                                  | 10/31/2017    | P, O   |
| 27 Latanoprostene bunod (Vyzulta)                 | Bausch & Lomb        | Prostaglandin analog                                                                                      | Intraocular pressure                                                                  | 11/02/2017    | S      |
| 28 Letemovir (Prevymis)                           | Merck & Co           | CMV DNA terminase complex inhibitor                                                                       | Prophylaxis of CMV                                                                    | 11/08/2017    | P, O   |
| 29 Semaglutide (Ozempic)                          | Novo Nordisk         | GLP1 receptor agonist                                                                                     | Type 2 diabetes                                                                       | 12/05/2017    | S      |
| 30 Ozenoxacin (Xepi)                              | Ferrer Internacional | Quinolone antimicrobial                                                                                   | Impetigo due to <i>Staphylococcus aureus</i> or <i>Streptococcus pyogenes</i>         | 12/11/2017    | S      |
| 31 Netarsudil mesylate (Rhopressa)                | Aerie Pharms         | RHO kinase inhibitor                                                                                      | Open-angle glaucoma or ocular hypertension                                            | 12/18/2017    | P      |
| 32 Ertugliflozin (Steglatro)                      | Merck & Co           | Sodium-dependent glucose cotransporter 2 (SGLT2) inhibitor                                                | Type 2 diabetes                                                                       | 12/19/2017    | S      |
| 33 Macimorelin acetate (Macrilen)                 | Novo Nordisk         | Growth hormone secretagogue receptor agonist                                                              | Diagnosis of adult growth hormone deficiency                                          | 12/20/2017    | S, O   |
| 34 Angiotensin II acetate (Giapreza)              | La Jolla Pharma      | Synthetic human angiotensin                                                                               | Blood pressure in adults with septic or other distributive shock                      | 12/21/2017    | P      |
| <b>2017 Biologics license applications = 12</b>   |                      |                                                                                                           |                                                                                       |               |        |
| 1 Brodalumab (Siliq)                              | Valeant Luxembourg   | IL-17RA-directed mAb                                                                                      | Plaque psoriasis                                                                      | 02/15/2017    | S      |
| 2 Avelumab (Bavencio)                             | Emd Serono           | PDL1-directed mAb                                                                                         | Merkel cell carcinoma                                                                 | 03/23/2017    | P, O   |
| 3 Ocrelizumab (Ocrevus)                           | Genentech            | CD20-directed mAb                                                                                         | Relapsing or primary progressive forms of multiple sclerosis                          | 03/23/2017    | P      |
| 4 Dupilumab (Dupixent)                            | Regeneron            | Interleukin-4 (IL-4) receptor alpha (IL-4R $\alpha$ )-directed mAb                                        | Atopic dermatitis                                                                     | 03/28/2017    | P      |
| 5 Cerliponase alfa (Brineura)                     | BioMarin Pharm       | Tripeptidyl peptidase                                                                                     | Tripeptidyl peptidase 1 deficiency                                                    | 04/27/2017    | P, O   |
| 6 Durvalumab (Imfinzi)                            | AstraZeneca          | PDL1-directed mAb                                                                                         | Urothelial carcinoma                                                                  | 05/01/2017    | P      |
| 7 Sarilumab (Kevzara)                             | Sanofi               | Interleukin 6 (IL-6) receptor-directed mAb                                                                | Rheumatoid arthritis                                                                  | 05/22/2017    | S      |



## Supplementary data: Table 1 – FDA-approved drugs (Continued)

| Drug (brand name)                               | Sponsor              | Properties                                                         | Indication                                          | Approval date | Review |
|-------------------------------------------------|----------------------|--------------------------------------------------------------------|-----------------------------------------------------|---------------|--------|
| <b>2017 Biologics license applications = 12</b> |                      |                                                                    |                                                     |               |        |
| 8 Guselkumab (Tremfya)                          | Janssen Biotech      | Interleukin 23 (IL-23)-directed mAb                                | Plaque psoriasis                                    | 07/13/2017    | P, O   |
| 9 Inotuzumab ozogamicin (Besponsa)              | Wyeth Pharms         | CD22-directed ADC                                                  | B cell precursor acute lymphoblastic leukemia (ALL) | 08/17/2017    | P, O   |
| 10 Benralizumab (Fasenra)                       | AstraZeneca          | Interleukin-5 (IL-5) receptor alpha (IL-5R $\alpha$ )-directed mAb | Severe asthma                                       | 11/14/2017    | S      |
| 11 Vestronidase alfa (Mepsevii)                 | Ultragenyx Pharm Inc | Recombinant human lysosomal $\beta$ -glucuronidase                 | Mucopolysaccharidosis VII                           | 11/15/2017    | P, O   |
| 12 Emicizumab (Hemlibra)                        | Genentech            | Bispecific FIX and FX-directed antibody                            | Hemophilia A                                        | 11/16/2017    | P, O   |

## Supplementary data: Table 1 – FDA-approved drugs (Continued)

| Drug (brand name)                                                              | Sponsor            | Properties                                                                                  | Indication                                                                                                  | Approval date | Review |
|--------------------------------------------------------------------------------|--------------------|---------------------------------------------------------------------------------------------|-------------------------------------------------------------------------------------------------------------|---------------|--------|
| <b>2018 New molecular entities = 42</b>                                        |                    |                                                                                             |                                                                                                             |               |        |
| 1 Lutetium dotatate Lu-177 (Lutathera)                                         | AAA USA Inc        | Somatostatin receptor-targeted radiopharmaceutical                                          | Gastroenteropancreatic neuroendocrine tumors (GEP-NETs)                                                     | 01/26/2018    | P, O   |
| 2 Bictegravir sodium; Emtricitabine; Tenofovir alafenamide fumarate (Biktarvy) | Gilead Sciences    | HIV-1 integrase inhibitor plus HIV-1 nucleoside/nucleotide reverse transcriptase inhibitors | HIV-1 infection                                                                                             | 02/07/2018    | P      |
| 3 Tezacaftor; Ivacaftor (Symdeko)                                              | Vertex Pharms      | Cystic fibrosis transmembrane conductance regulator (CFTR) corrector and CFTR potentiator   | Cystic fibrosis                                                                                             | 02/12/2018    | P, O   |
| 4 Apalutamide (Erleada)                                                        | Janssen Biotech    | Androgen receptor inhibitor                                                                 | Prostate cancer                                                                                             | 02/14/2018    | P      |
| 5 Fostamatinib disodium (Tavalisse)                                            | Rigel Pharms       | Spleen tyrosine kinase (SYK) inhibitor                                                      | Immune thrombocytopenic purpura                                                                             | 04/17/2018    | S, O   |
| 6 Fosnetupitant chloride HCl; Palonosetron HCl (Akyzео IV)                     | Helsinn Group      | Neurokinin 1 (NK1) receptor antagonist plus 5-HT <sub>3</sub> receptor antagonist           | Chemotherapy-induced nausea                                                                                 | 04/19/2018    | S      |
| 7 Lofexidine HCl (Lucemyra)                                                    | US WorldMeds       | α <sub>2</sub> -adrenoceptor agonist                                                        | Opioid withdrawal                                                                                           | 05/16/2018    | P      |
| 8 Sodium zirconium cyclosilicate (Lokelma)                                     | AstraZeneca        | Potassium binder                                                                            | Hyperkalemia                                                                                                | 05/18/2018    | S      |
| 9 Avatrombopag maleate (Doptelet)                                              | Akarx              | Thrombopoietin receptor agonist                                                             | Thrombocytopenia                                                                                            | 05/21/2018    | P      |
| 10 Baricitinib (Olmiant)                                                       | Eli Lilly & Co     | Reversible Janus kinase (JAK) inhibitor                                                     | Rheumatoid arthritis                                                                                        | 05/31/2018    | S      |
| 11 Moxidectin                                                                  | MDGH               | Anthelmintic GABA receptor and glutamate channel modulator                                  | River blindness                                                                                             | 06/13/2018    | P, O   |
| 12 Plazomicin sulfate (Zemdri)                                                 | Cipla USA          | Aminoglycoside antibacterial                                                                | Urinary tract infections                                                                                    | 06/25/2018    | P      |
| 13 Cannabidiol (Epidiolex)                                                     | GW Res Ltd         | Cannabinoid                                                                                 | Dravet syndrome and Lennox-Gastaut syndrome                                                                 | 06/25/2018    | P, O   |
| 14 Encorafenib (Braftovi)                                                      | Array BioPharma    | BRAF inhibitor                                                                              | BRAF-mutated melanoma                                                                                       | 06/27/2018    | S, O   |
| 15 Binimetinib (Mektovi)                                                       | Array BioPharma    | MEK inhibitor                                                                               | BRAF-mutated melanoma                                                                                       | 06/27/2018    | S, O   |
| 16 Tecovirimat (Tpoxx)                                                         | SIGA Technologies  | Viral p37 protein inhibitor                                                                 | Smallpox                                                                                                    | 07/13/2018    | P, O   |
| 17 Tafenoquine succinate (Krintafel)                                           | GlaxoSmithKline    | 8-Aminoquinoline antimalarial                                                               | Plasmodium vivax malaria                                                                                    | 07/20/2018    | P, O   |
| 18 Ivosidenib (Tibsovo)                                                        | Servier            | Isocitrate dehydrogenase-1 (IDH1) inhibitor                                                 | IDH1-mutated acute myeloid leukemia (AML)                                                                   | 07/20/2018    | P, O   |
| 19 Elagolix sodium (Orilissa)                                                  | AbbVie             | GnRH receptor antagonist                                                                    | Pain associated with endometriosis                                                                          | 07/23/2018    | P      |
| 20 Fish oil triglycerides (Omegaven)                                           | Fresenius Kabi USA | Mixture of fatty acids                                                                      | Parenteral nutrition-associated cholestasis                                                                 | 07/27/2018    | P, O   |
| 21 Lusutrombopag (Mupleta)                                                     | Shionogi Inc       | Thrombopoietin receptor agonist                                                             | Thrombocytopenia                                                                                            | 07/31/2018    | P      |
| 22 Migalastat HCl (Galafold)                                                   | Amicus Therap US   | α-galactosidase regulator                                                                   | Fabry disease                                                                                               | 08/10/2018    | P, O   |
| 23 Ethinyl estradiol; Segesterone acetate (Annovera)                           | Therapeuticsmd     | Estrogen and progestin combined hormonal contraceptive                                      | Female contraception                                                                                        | 08/10/2018    | S      |
| 24 Patisiran sodium (Onpatro)                                                  | Alnylam Pharms     | Transthyretin (TTR)-directed small interfering RNA                                          | Hereditary TTR-mediated amyloidosis                                                                         | 08/10/2018    | P, O   |
| 25 Stiripentol (Diacomit)                                                      | Biocodex           | γ-aminobutyric acid (GABA) reuptake inhibitor                                               | Dravet syndrome                                                                                             | 08/20/2018    | P, O   |
| 26 Eravacycline 2HCl (Xerava)                                                  | Tetraphase Pharms  | Tetracycline antibiotic                                                                     | Complicated intra-abdominal infections                                                                      | 08/27/2018    | P      |
| 27 Doravirine (Pifeltro)                                                       | Merck & Co         | Non-nucleoside reverse transcriptase inhibitor                                              | HIV-1 infection                                                                                             | 08/30/2018    | S      |
| 28 Duvelisib (Copiktra)                                                        | Secura             | Phosphatidylinositol 3-kinase δ/γ (PI3Kδ/γ) inhibitor                                       | Chronic lymphocytic leukaemia (CLL), follicular lymphoma (FL), and small lymphocytic lymphoma (SLL)         | 09/24/2018    | P, O   |
| 29 Dacomitinib (Vizimpro)                                                      | Pfizer             | EGFR inhibitor                                                                              | EGFR-mutated NSCLC                                                                                          | 09/27/2018    | P, O   |
| 30 Sarecycline HCl (Seysara)                                                   | Almirall           | Tetracycline antibiotic                                                                     | Severe acne vulgaris                                                                                        | 10/01/2018    | S      |
| 31 Omadacycline tosylate (Nuzyra)                                              | Paratek Pharms     | Tetracycline antibiotic                                                                     | Community-acquired bacterial pneumonia (CABP) and acute bacterial skin and skin structure infection (ABSSI) | 10/02/2018    | P      |
| 32 Inotersen sodium (Tegsedi)                                                  | Akcea Theraps      | Transthyretin (TTR)-directed antisense oligonucleotide                                      | Hereditary TTR-mediated amyloidosis                                                                         | 10/05/2018    | P, O   |
| 33 Talazoparib tosylate (Talzenna)                                             | Pfizer             | Poly-ADP ribose polymerase (PARP) inhibitor                                                 | BRCA-mutated HER2-negative breast cancer                                                                    | 10/16/2018    | P      |
| 34 Baloxavir marboxil (Xofluza)                                                | Genentech          | Polymerase acidic endonuclease inhibitor                                                    | Acute uncomplicated influenza                                                                               | 10/24/2018    | P      |
| 35 Lorlatinib (Lorbrena)                                                       | Pfizer             | Multi-target TKI (ALK and ROS1)                                                             | ALK-positive NSCLC                                                                                          | 11/02/2018    | P, O   |
| 36 Revefenacin (Yupelri)                                                       | Mylan Ireland      | Long-acting muscarinic receptor antagonist                                                  | Chronic obstructive pulmonary disease (COPD)                                                                | 11/09/2018    | S      |
| 37 Rifamycin sodium (Aemcolo)                                                  | Cosmo Technologies | Ansamycin antibacterial                                                                     | Travelers' diarrhea                                                                                         | 11/16/2018    | P      |
| 38 Glasdegib maleate (Daurismo)                                                | Pfizer             | Smoothed (Hedgehog pathway) inhibitor                                                       | Acute myeloid leukemia (AML)                                                                                | 11/21/2018    | P, O   |
| 39 Larotrectinib sulfate (Vitrakvi)                                            | Bayer              | TRKs inhibitor                                                                              | NTRK-positive solid cancers                                                                                 | 11/26/2018    | P, O   |
| 40 Amifampridine phosphate (Firdapse)                                          | Catalyst Pharms    | Potassium channel blocker                                                                   | Lambert-Eaton myasthenic syndrome                                                                           | 11/28/2018    | P, O   |
| 41 Gilteritinib fumarate (Xospata)                                             | Astellas           | Fms-like tyrosine kinase 3 (FLT3) inhibitor                                                 | FLT3-positive AML                                                                                           | 11/28/2018    | P, O   |

## Supplementary data: Table 1 – FDA-approved drugs (Continued)

| Drug (brand name)                               | Sponsor                   | Properties                                                    | Indication                                                              | Approval date | Review |
|-------------------------------------------------|---------------------------|---------------------------------------------------------------|-------------------------------------------------------------------------|---------------|--------|
| 42 Prucalopride succinate (Motegrity)           | Takeda Pharms USA         | 5-HT4 receptor agonist                                        | Chronic idiopathic constipation                                         | 12/14/2018    | S      |
| <b>2018 Biologics license applications = 17</b> |                           |                                                               |                                                                         |               |        |
| 1 Ibalizumab (Trogarzo)                         | TaiMed Biologics USA      | CD4-directed mAb                                              | HIV-1 infection                                                         | 03/06/2018    | P, O   |
| 2 Tildrakizumab (Ilumya)                        | Sun Pharma Global         | Interleukin-23 (IL-23)-directed mAb                           | Plaque psoriasis                                                        | 03/20/2018    | S      |
| 3 Burosumab (Crysvita)                          | Ultragenyx Pharm          | Fibroblast growth factor 23 (FGF23)-directed mAb              | X-linked hypophosphatemia                                               | 04/17/2018    | P, O   |
| 4 Erenumab (Aimovig)                            | Amgen Inc                 | Calcitonin gene-related peptide receptor (CGRPR)-directed mAb | Migraine                                                                | 05/17/2018    | S      |
| 5 Pegvaliase (Palynziq)                         | BioMarin Pharm            | Recombinant phenylalanine ammonia lyase (PAL) enzyme          | Phenylketonuria                                                         | 05/24/2018    | P, O   |
| 6 Mogamulizumab (Poteligeo)                     | Kyowa Kirin               | CC chemokine receptor 4 (CCR4)-directed mAb                   | Mycosis fungoides and Sézary syndrome                                   | 08/08/2018    | P, O   |
| 7 Cenegermin (Oxervate)                         | Dompe Farmaceutici        | Recombinant human nerve growth factor (NGF)                   | Neurotrophic keratitis                                                  | 08/22/2018    | P, O   |
| 8 Lanadelumab (Takhzyro)                        | Dyax Corp                 | Kallikrein-directed mAb                                       | Hereditary angioedema                                                   | 08/23/2018    | P, O   |
| 9 Moxetumomab pasudotox (Lumoxiti)              | Innate Pharma             | CD22-directed ADC                                             | Hairy cell leukemia                                                     | 09/13/2018    | P, O   |
| 10 Fremanezumab (Ajovy)                         | Teva Pharms USA           | Calcitonin gene-related peptide (CGRP)-directed mAb           | Migraine                                                                | 09/14/2018    | P      |
| 11 Galcanezumab (Emgality)                      | Eli Lilly & Co            | Calcitonin gene-related peptide (CGRP)-directed mAb           | Migraine                                                                | 09/27/2018    | S      |
| 12 Cemiplimab (Libtayo)                         | Regeneron Pharmaceuticals | Programmed death receptor-1 (PD1)-directed mAb                | Metastatic or locally advanced cutaneous squamous cell carcinoma (CSCC) | 09/28/2018    | P      |
| 13 Elapegedemase (Revcovi)                      | Leadiant Biosci           | Recombinant human adenosine deaminase                         | Adenosine deaminase severe combined immune deficiency (ADA-SCID)        | 10/05/2018    | P, O   |
| 14 Emapalumab (Gamifant)                        | Novimmune S.A.            | Interferon-γ (INFγ)-directed mAb                              | Primary hemophagocytic lymphohistiocytosis                              | 11/20/2018    | P, O   |
| 15 Calaspargase pegol (Asparlas)                | Servier Pharma            | Asparagine specific enzyme                                    | Acute lymphoblastic leukemia (ALL)                                      | 12/20/2018    | S, O   |
| 16 Ravulizumab (Ultomiris)                      | Alexion Pharm             | Complement 5 (C5)-directed mAb                                | Paroxysmal nocturnal hemoglobinuria                                     | 12/21/2018    | S, O   |
| 17 Tagraxofusp (Elzonris)                       | Stemline Therapeutics     | IL-3 and diphtheria toxin fusion protein                      | Blastic plasmacytoid dendritic cell neoplasm                            | 12/21/2018    | P, O   |

## Supplementary data: Table 1 – FDA-approved drugs (Continued)

| Drug (brand name)                                      | Sponsor              | Properties                                                                                                         | Indication                                                                 | Approval date | Review |
|--------------------------------------------------------|----------------------|--------------------------------------------------------------------------------------------------------------------|----------------------------------------------------------------------------|---------------|--------|
| <b>2019 New molecular entities = 38</b>                |                      |                                                                                                                    |                                                                            |               |        |
| 1 Triclabendazole (Egaten)                             | Novartis             | Anthelmintic, MOA unknown                                                                                          | Fascioliasis                                                               | 02/13/2019    | P, O   |
| 2 Brexanolone (Zulresso)                               | Sage Therap          | γ-aminobutyric acid A (GABA <sub>A</sub> ) receptor- positive modulator                                            | Postpartum depression                                                      | 03/19/2019    | P      |
| 3 Solriamfetol HCl (Sunosi)                            | Jazz                 | Dopamine and noradrenaline reuptake inhibitor                                                                      | Excessive sleepiness due to narcolepsy or obstructive sleep apnea          | 03/20/2019    | S, O   |
| 4 Siponimod fumaric acid (Mayzent)                     | Novartis             | Sphingosine 1-phosphate (S1P) receptor modulator                                                                   | Relapsing forms of multiple sclerosis                                      | 03/26/2019    | S      |
| 5 Erdafitinib (Balversa)                               | Janssen Biotech      | Fibroblast growth factor receptor (FGFR) inhibitor                                                                 | Bladder cancer                                                             | 04/12/2019    | P      |
| 6 Tafamidis meglumine (Vyndaqel)                       | Foldrx Pharms        | Transthyretin stabilizer                                                                                           | Heart disease caused by transthyretin amyloid cardiomyopathy (ATTR-CM)     | 05/03/2019    | P, O   |
| 7 Alpelisib (Piqray)                                   | Novartis             | Phosphatidylinositol 3-kinase α (PI3Kα) inhibitor                                                                  | Breast cancer                                                              | 05/24/2019    | P      |
| 8 Bremelanotide acetate (Vyleesi)                      | Palatin Technologies | Melanocortin receptor agonist                                                                                      | Hypoactive sexual desire disorder                                          | 06/21/2019    | S      |
| 9 Selinexor (Xpovio)                                   | Karyopharm Theraps   | Exportin 1 (XPO1) inhibitor                                                                                        | Multiple myeloma                                                           | 07/03/2019    | P, O   |
| 10 Cilastatin sodium; Imipenem; Relebactam (Recarbrio) | Msd Merck Co         | Renal dehydropeptidase inhibitor; Penem antibacterial; β-lactamase inhibitor                                       | Complicated urinary tract and complicated intra-abdominal infections       | 07/16/2019    | P      |
| 11 Ferric maltol (Accrufer)                            | Shield TX            | Iron replacement product                                                                                           | Iron deficiency anemia                                                     | 07/25/2019    | S      |
| 12 Darolutamide (Nubeqa)                               | Bayer Healthcare     | Androgen receptor inhibitor                                                                                        | Prostate cancer                                                            | 07/30/2019    | P      |
| 13 Pexidartinib HCl (Turalio)                          | Daiichi Sankyo Inc   | CSF1R, KIT, and FLT3 inhibitor                                                                                     | Tenosynovial giant cell tumor                                              | 08/02/2019    | P, O   |
| 14 Pitolisant HCl (Wakix)                              | Harmony              | Histamine H3 receptor antagonist/inverse agonist                                                                   | Excessive sleepiness due to narcolepsy                                     | 08/14/2019    | P, O   |
| 15 Pretomanid (Pretomanid)                             | Mylan Ireland Ltd    | Antimycobacterial                                                                                                  | Tuberculosis                                                               | 08/14/2019    | P, O   |
| 16 Entrectinib (Rozlytrek)                             | Genentech Inc        | Multi-target TKI (TRKs, ROS1, and ALK)                                                                             | NTRK fusion- positive solid tumors and ROS1- positive NSCLC                | 08/15/2019    | P, O   |
| 17 Upadacitinib (Rinvoq)                               | AbbVie Inc           | JAK inhibitor                                                                                                      | Rheumatoid arthritis                                                       | 08/16/2019    | S      |
| 18 Fedratinib HCl (Inrebic)                            | Impact               | JAK2 and FLT3 inhibitor                                                                                            | Myelofibrosis                                                              | 08/16/2019    | P, O   |
| 19 Lefamulin acetate (Xenleta)                         | Nabriva              | Pleuromutilin antibacterial                                                                                        | Community-acquired bacterial pneumonia (CABP)                              | 08/19/2019    | P      |
| 20 Gallium dotatoc Ga-68                               | UIHC PET Imaging     | <sup>68</sup> Ga labelled radioactive diagnostic agent                                                             | Localization of somatostatin receptor-positive neuroendocrine tumors       | 08/21/2019    | S, O   |
| 21 Istradefylline (Nourianz)                           | Kyowa Kirin          | Adenosine receptor antagonist                                                                                      | Parkinson disease, 'off' episodes                                          | 08/27/2019    | S      |
| 22 Tenapanor HCl (Ibsrela)                             | Ardelyx Inc          | Sodium/hydrogen exchanger 3 (NHE3) inhibitor                                                                       | Irritable bowel syndrome (IBS) with constipation                           | 09/12/2019    | S      |
| 23 Trifarotene (Aklief)                                | Galderma Labs Lp     | Retinoic acid receptor agonist                                                                                     | Acne vulgaris                                                              | 10/04/2019    | S      |
| 24 Afamelanotide (Scenesse)                            | Clinuvel Inc         | Melanocortin 1 receptor agonist                                                                                    | Erythropoietic protoporphyria                                              | 10/08/2019    | P, O   |
| 25 Fluorodopa F-18                                     | Feinstein            | <sup>18</sup> F labelled radioactive diagnostic agent                                                              | Diagnosis of parkinsonian syndromes                                        | 10/10/2019    | S      |
| 26 Lasmiditan succinate (Reyvow)                       | Eli Lilly & Co       | 5-HT <sub>1F</sub> receptor agonist                                                                                | Migraine with or without aura                                              | 10/11/2019    | S      |
| 27 Tezacaftor; Elexacaftor; Ivacaftor (Trikafta)       | Vertex Pharms Inc    | Two cystic fibrosis transmembrane conductance regulator (CFTR) correctors and a CFTR potentiator                   | Most common gene mutation that causes cystic fibrosis                      | 10/21/2019    | P, O   |
| 28 Air polymer-type A (ExEm Foam kit)                  | Giskit               | Ultrasound contrast agent                                                                                          | Assess fallopian tube patency in women with known or suspected infertility | 11/07/2019    | S      |
| 29 Cefiderocol sulfate tosylate (Fetroja)              | Shionogi Inc         | Cephalosporin antibacterial, inhibits cell wall synthesis                                                          | Complicated urinary tract infections                                       | 11/14/2019    | P      |
| 30 Zanubrutinib (Brukinsa)                             | BeiGene              | Bruton's tyrosine kinase (BTK) inhibitor                                                                           | Mantle cell lymphoma                                                       | 11/14/2019    | P, O   |
| 31 Givosiran sodium (Givlaari)                         | Anylam Pharms Inc    | 5-aminolevulinic acid synthase (ALAS1)-directed siRNA                                                              | Acute hepatic porphyria                                                    | 11/20/2019    | P, O   |
| 32 Cenobamate (Xcopri)                                 | SK Life              | Voltage-gated sodium channel inhibitor and γ-aminobutyric acid A (GABA <sub>A</sub> ) receptor- positive modulator | Partial onset seizures                                                     | 11/21/2019    | S      |
| 33 Voxelotor (Oxbryta)                                 | Global Blood Theraps | Hemoglobin S polymerization inhibitor                                                                              | Sickle cell disease (SCD)                                                  | 11/25/2019    | P, O   |
| 34 Golodirsen (Vyondys 53)                             | Sarepta Theraps Inc  | Exon 53 skipping antisense                                                                                         | Duchenne muscular dystrophy                                                | 12/12/2019    | P, O   |
| 35 Lumateperone tosylate (Caplyta)                     | Intra-Cellular       | Atypical antipsychotic                                                                                             | Schizophrenia                                                              | 12/20/2019    | S      |
| 36 Brilliant Blue G (Tissueblue)                       | Dutch Ophthalmic     | Brilliant Blue G dye                                                                                               | Staining the internal limiting membrane                                    | 12/20/2019    | P, O   |
| 37 Lemborexant (Dayvigo)                               | Eisai Inc            | Orexin receptor antagonist                                                                                         | Insomnia                                                                   | 12/20/2019    | S      |
| 38 Ubrogепant (Ubroelvy)                               | Allergan             | Calcitonin gene- related peptide (CGRP) receptor antagonist                                                        | Migraine with or without aura                                              | 12/23/2019    | S      |
| <b>2019 Biologics license applications = 10</b>        |                      |                                                                                                                    |                                                                            |               |        |
| 1 PrabotulinumtoxinA (Jeuveau)                         | Evolus Inc           | Acetylcholine release inhibitor and a neuromuscular blocking agent                                                 | Glabella lines associated with corrugator and/or procerus muscle activity  | 02/01/2019    | S      |
| 2 Caplacizumab (Cablivi)                               | Ablynx NV            | von Willebrand factor (vWF)-directed nanobody                                                                      | Acquired thrombotic thrombocytopenic purpura (ATTP)                        | 02/06/2019    | P, O   |

## Supplementary data: Table 1 – FDA-approved drugs (Continued)

| Drug (brand name)                               | Sponsor        | Properties                                                                                                                     | Indication                                         | Approval date | Review |
|-------------------------------------------------|----------------|--------------------------------------------------------------------------------------------------------------------------------|----------------------------------------------------|---------------|--------|
| <b>2019 Biologics license applications = 10</b> |                |                                                                                                                                |                                                    |               |        |
| 3 Romosozumab (Evenity)                         | Amgen Inc      | Sclerostin-directed mAb                                                                                                        | Osteoporosis                                       | 04/09/2019    | S      |
| 4 Risankizumab (Skyrizi)                        | AbbVie Inc     | Interleukin-23 (IL-23)-directed mAb                                                                                            | Plaque psoriasis                                   | 04/23/2019    | S      |
| 5 Polatuzumab vedotin (Polivy)                  | Genentech      | CD79b-directed antibody-drug conjugate (ADC)                                                                                   | Diffuse large B-cell lymphoma                      | 06/10/2019    | P, O   |
| 6 Brolucizumab (Beovu)                          | Novartis       | VEGFA-directed antibody-drug conjugate (ADC)                                                                                   | Wet age-related macular degeneration               | 10/07/2019    | S      |
| 7 Luspatercept (Reblozyl)                       | Celgene        | Recombinant fusion protein comprised of modified extracellular domain of activin receptor type IIB and FC domain of human IgG1 | Anemia in $\beta$ -thalassemia                     | 11/08/2019    | P, O   |
| 8 Crizanlizumab (Adakveo)                       | Novartis       | P-selectin blocker                                                                                                             | Painful complications of sickle cell disease (SCD) | 11/15/2019    | P, O   |
| 9 Enfortumab vedotin (Padcev)                   | Astellas       | Nectin-4-directed antibody-drug conjugate (ADC)                                                                                | Urothelial carcinoma                               | 12/18/2019    | P      |
| 10 Trastuzumab deruxtecan (Enhertu)             | Daiichi Sankyo | HER2-directed antibody-drug conjugate (ADC)                                                                                    | HER2-positive breast cancer                        | 12/20/2019    | P      |

## Supplementary data: Table 1 – FDA-approved drugs (Continued)

| Drug (brand name)                               | Sponsor                 | Properties                                                       | Indication                                                                                  | Approval date | Review |
|-------------------------------------------------|-------------------------|------------------------------------------------------------------|---------------------------------------------------------------------------------------------|---------------|--------|
| <b>2020 New molecular entities = 40</b>         |                         |                                                                  |                                                                                             |               |        |
| 1 Avapritinib (Ayvakit)                         | Blueprint Medicines     | PDGFR $\alpha$ , PDGFR $\alpha$ mutants, and KIT inhibitor       | Gastrointestinal stromal tumor (GIST) with <i>PDGFRA</i> exon 18 mutations                  | 01/09/2020    | P, O   |
| 2 Tazemetostat (Tazverik)                       | Epizyme Inc             | Enhancer of Zeste Homolog 2 (EZH2) inhibitor                     | Epithelioid sarcoma                                                                         | 01/23/2020    | P, O   |
| 3 Lactitol (Pizensy)                            | Braintree Labs          | Osmotic laxative                                                 | Chronic idiopathic constipation                                                             | 02/12/2020    | S      |
| 4 Bempedoic acid (Nexletol)                     | Esperion Therapeutics   | Adenosine triphosphate-citrate lyase (ACL) inhibitor             | Heterozygous familial hypercholesterolemia (HeFH) or atherosclerotic cardiovascular disease | 02/21/2020    | S      |
| 5 Amisulpride (Barhemsys)                       | Acacia                  | Dopamine D2 receptor antagonist                                  | Nausea and vomiting after surgery                                                           | 02/26/2020    | S      |
| 6 Rimegepant sulfate (Nurtec ODT)               | Biohaven                | Calcitonin gene-related peptide (CGRP) receptor antagonist       | Migraine                                                                                    | 02/27/2020    | S      |
| 7 Osilodrostat phosphate (Isturisa)             | Recordati Rare Diseases | Cortisol synthesis inhibitor                                     | Cushing's disease                                                                           | 03/06/2020    | S, O   |
| 8 Ozanimod HCl (Zeposia)                        | Celgene                 | Sphingosine 1-phosphate (S1P) receptor modulator                 | Multiple sclerosis                                                                          | 03/25/2020    | S      |
| 9 Selumetinib sulfate (Koselugo)                | AstraZeneca             | MEK1/2 kinase inhibitor                                          | Neurofibromatosis type 1                                                                    | 04/10/2020    | P, O   |
| 10 Tucatinib (Tukysa)                           | Seagen                  | HER2 inhibitor                                                   | HER2-positive breast cancer                                                                 | 04/17/2020    | P, O   |
| 11 Pemigatinib (Pemazyre)                       | Incyte                  | Fibroblast growth factor receptor 1-3 (FGFR1-3) kinase inhibitor | Advanced cholangiocarcinoma with <i>FGFR2</i> fusions/rearrangements                        | 04/17/2020    | P, O   |
| 12 Opicapone (Ongentys)                         | Neurocrine              | Catechol-O-methyltransferase (COMT) inhibitor                    | Parkinson's disease                                                                         | 04/24/2020    | S      |
| 13 Capmatinib HCl (Tabrecta)                    | Novartis                | MET kinase inhibitor                                             | Non-small-cell lung cancer (NSCLC)                                                          | 05/06/2020    | P, O   |
| 14 Selpercatinib (Retevmo)                      | Loxo Oncology           | RET kinase inhibitor                                             | RET fusion-positive NSCLC and thyroid cancer                                                | 05/08/2020    | P, O   |
| 15 Ripretinib (Qinlock)                         | Deciphera               | PDGFR $\alpha$ , PDGFR $\alpha$ mutants, and KIT inhibitor       | Advanced gastrointestinal stromal tumor (GIST)                                              | 05/15/2020    | P, O   |
| 16 Fluoroestradiol F-18 (Cerianna)              | Zionexa                 | <sup>18</sup> F labelled radioactive diagnostic agent            | Imaging, breast cancer                                                                      | 05/20/2020    | S      |
| 17 Artesunate                                   | Amivas                  | Artemisinin antimalarial                                         | Severe malaria                                                                              | 05/26/2020    | P, O   |
| 18 Flortaucipir F-18 (Tauvid)                   | Avid Radiopharms        | <sup>18</sup> F labelled radioactive diagnostic agent            | Imaging, tau in Alzheimer's disease                                                         | 05/28/2020    | P      |
| 19 Lurbinectedin (Zepzelca)                     | Jazz                    | DNA alkylating drug                                              | Small-cell lung cancer                                                                      | 06/15/2020    | P, O   |
| 20 Triheptanoin (Dojolvi)                       | Ultragenyx              | Medium-chain triglyceride                                        | Long chain fatty acid oxidation disorders (LC-FAODs)                                        | 06/30/2020    | S, O   |
| 21 Remimazolam besylate (Byfavo)                | Acacia                  | Benzodiazepine                                                   | Procedural sedation                                                                         | 07/02/2020    | S      |
| 22 Fostemsavir tromethamine (Rukobia)           | Viiv Healthcare         | HIV-1 attachment inhibitor                                       | HIV-1 infection                                                                             | 07/02/2020    | P      |
| 23 Cedazuridine; Decitabine (Inqovi)            | Otsuka                  | Cytidine deaminase inhibitor; Nucleoside metabolic inhibitor     | Myelodysplastic syndromes                                                                   | 07/07/2020    | P, O   |
| 24 Abametapir (Xeglyze)                         | Dr Reddy's              | Metalloproteinase inhibitor                                      | Head lice                                                                                   | 07/24/2020    | S      |
| 25 Nifurtimox (Lampit)                          | Bayer                   | Nitrofurant antiprotozoal                                        | Chagas disease                                                                              | 08/06/2020    | P, O   |
| 26 Oliceridine (Olinvyk)                        | Trevena                 | Opioid receptor agonist                                          | Acute pain                                                                                  | 08/07/2020    | S      |
| 27 Risdiplam (Evryso)                           | Genentech               | Survival of motor neuron 2 (SMN2) splicing modifier              | Spinal muscular atrophy                                                                     | 08/07/2020    | P, O   |
| 28 Viltolarsen (Viltepso)                       | Nippon Shinyaku         | Dystrophin splicing modifier                                     | Duchenne muscular dystrophy                                                                 | 08/12/2020    | P, O   |
| 29 Clascoterone (Winlevi)                       | Sun Pharm               | Androgen receptor inhibitor                                      | Acne vulgaris                                                                               | 08/26/2020    | S      |
| 30 Copper dotatate Cu-64 (Detectnet)            | Radiomedix              | <sup>64</sup> Cu labelled somatostatin analog                    | Imaging, cancer                                                                             | 09/03/2020    | P, O   |
| 31 Pralsetinib (Gavreto)                        | Genentech               | RET kinase inhibitor                                             | RET fusion-positive NSCLC                                                                   | 09/04/2020    | P, O   |
| 32 Remdesivir (Veklury)                         | Gilead Sciences         | Nucleotide analog RNA polymerase inhibitor                       | COVID-19 infection                                                                          | 10/22/2020    | P      |
| 33 Lonafarnib (Zokinvy)                         | Eiger Biopharms         | Farnesyltransferase inhibitor                                    | Hutchinson-Gilford progeria syndrome (HGPS)                                                 | 11/20/2020    | P, O   |
| 34 Lumasiran sodium (Oxlumo)                    | Alnylam                 | Hydroxyacid oxidase 1 (HAO1)-directed siRNA                      | Hyperoxaluria type 1                                                                        | 11/23/2020    | P, O   |
| 35 Setmelanotide acetate (Imcivree)             | Rhythm                  | Melanocortin 4 (MC4) receptor agonist                            | Rare genetic diseases of obesity                                                            | 11/25/2020    | P, O   |
| 36 PSMA-11 Ga-68                                | UCLA                    | <sup>68</sup> Ga labelled radioactive diagnostic agent           | Imaging, prostate cancer                                                                    | 12/01/2020    | S      |
| 37 Berotralstat HCl (Orladeyo)                  | BioCryst                | Plasma kallikrein inhibitor                                      | Hereditary angioedema                                                                       | 12/03/2020    | S, O   |
| 38 Tirbanibulin (Klisyri)                       | Almirall                | Microtubule inhibitor                                            | Actinic keratosis                                                                           | 12/14/2020    | S      |
| 39 Relugolix (Orgovyx)                          | Myovant Sciences        | GnRH receptor antagonist                                         | Prostate cancer                                                                             | 12/18/2020    | P      |
| 40 Vibegron (Gemtesa)                           | Urovant Sciences        | $\beta$ 3-adrenoceptor agonist                                   | Overactive bladder                                                                          | 12/23/2020    | S      |
| <b>2020 Biologics license applications = 13</b> |                         |                                                                  |                                                                                             |               |        |
| 1 Teprotumumab (Tepezza)                        | Horizon Therapeutics    | Insulin-like growth factor-1 receptor (IGF1R)-directed mAb       | Thyroid eye disease                                                                         | 01/21/2020    | P, O   |
| 2 Eptinezumab (Vyepti)                          | Lundbeck                | Calcitonin gene-related peptide (CGRP)-directed mAb              | Migraine                                                                                    | 02/21/2020    | S      |

## Supplementary data: Table 1 – FDA-approved drugs (Continued)

| Drug (brand name)                                | Sponsor             | Properties                                              | Indication                                     | Approval date | Review |
|--------------------------------------------------|---------------------|---------------------------------------------------------|------------------------------------------------|---------------|--------|
| <b>2020 Biologics license applications = 13</b>  |                     |                                                         |                                                |               |        |
| 3 Isatuximab (Sarclisa)                          | Sanofi              | CD38-directed mAb                                       | Multiple myeloma                               | 03/02/2020    | S, O   |
| 4 Sacituzumab govitecan (Trodelvy)               | Immunomedics Inc    | Trophoblast cell surface antigen 2 (Trop2)-directed ADC | Triple-negative breast cancer                  | 04/22/2020    | P      |
| 5 Inebilizumab (Uplizna)                         | Vielia Bio          | CD19-directed mAb                                       | Neuromyelitis optica spectrum disorder (NMOSD) | 06/11/2020    | S, O   |
| 6 Tafasitamab (Monjuvi)                          | MorphoSys           | CD19-directed mAb                                       | Diffuse large B-cell lymphoma (DLBCL)          | 07/31/2020    | P, O   |
| 7 Belantamab mafodotin (Blenrep)                 | GlaxoSmithKline     | B-cell maturation antigen (BCMA)-directed ADC           | Multiple myeloma                               | 08/05/2020    | P, O   |
| 8 Satralizumab (Enspryng)                        | Genentech           | Interleukin-6 receptor (IL-6R)-directed mAb             | Neuromyelitis optica spectrum disorder (NMOSD) | 08/14/2020    | S, O   |
| 9 Somapacitan (Sogroya)                          | Novo Nordisk        | Growth hormone analog                                   | Growth hormone deficiency                      | 08/28/2020    | S      |
| 10 Atoltivimab; Odesivimab; Maftivimab (Inmazeb) | Jazz                | Cocktail of Ebola glycoprotein-directed mAbs            | Ebola virus                                    | 10/14/2020    | P, O   |
| 11 Naxitamab (Danyelza)                          | Y-mAbs Therapeutics | GD2-directed mAb                                        | High-risk neuroblastoma                        | 11/25/2020    | P, O   |
| 12 Margetuximab (Margenza)                       | MacroGenics         | HER2-directed mAb                                       | HER2-positive breast cancer                    | 12/16/2020    | S      |
| 13 Ansuvimab (Ebanga)                            | Ridgeback           | Ebola glycoprotein-directed mAb                         | Ebola virus                                    | 12/21/2020    | P, O   |

## Supplementary data: Table 1 – FDA-approved drugs (Continued)

| Drug (brand name)                                                    | Sponsor          | Properties                                                                                                      | Indication                                                                                          | Approval date | Review |
|----------------------------------------------------------------------|------------------|-----------------------------------------------------------------------------------------------------------------|-----------------------------------------------------------------------------------------------------|---------------|--------|
| <b>2021 New molecular entities = 36</b>                              |                  |                                                                                                                 |                                                                                                     |               |        |
| 1 Vericiguat (Verquvo)                                               | Merck & Co       | Soluble guanylate cyclase (sGC) stimulator                                                                      | Chronic heart failure                                                                               | 01/19/2021    | P      |
| 2 Cabotegravir; Rilpivirine (Cabenuva Kit)                           | Viiv Hlthcare    | Integrase strand transfer inhibitor (INSTI) and non-nucleoside reverse transcriptase inhibitor (NNRTI) of HIV-1 | HIV-1 infection                                                                                     | 01/21/2021    | P      |
| 3 Voclosporin (Lupkynis)                                             | Aurinia          | Calcineurin inhibitor                                                                                           | Lupus nephritis                                                                                     | 01/22/2021    | P      |
| 4 Tepotinib HCl (Tepmetko)                                           | Emd Serono       | MET inhibitor                                                                                                   | Non-small-cell lung cancer (NSCLC)                                                                  | 02/03/2021    | P, O   |
| 5 Umbralisib tosylate (Ukoniq)                                       | TG Theraps       | PI3Kδ and CK1ε inhibitor                                                                                        | Relapsed or refractory marginal zone lymphoma (MZL), follicular lymphoma                            | 02/05/2021    | P, O   |
| 6 Trilaciclib 2HCl (Cosela)                                          | G1 Therap        | CDK4/6 kinase inhibitor                                                                                         | Chemotherapy-induced myelosuppression                                                               | 02/12/2021    | P      |
| 7 Casimersen (Amondys 45)                                            | Sarepta          | Exon 45-skipping antisense oligonucleotide (ASO)                                                                | Duchenne muscular dystrophy (DMD)                                                                   | 02/25/2021    | P, O   |
| 8 Fosdenopterin HCl (Nulibry)                                        | Origin           | Cyclic pyranopterin monophosphate (cPMP)                                                                        | Molybdenum cofactor deficiency (MoCD) type A                                                        | 02/26/2021    | P, O   |
| 9 Melphalan flufenamide HCl (Pepaxto)                                | Oncopeptides     | Peptide-conjugated alkylating drug                                                                              | Multiple myeloma                                                                                    | 02/26/2021    | P, O   |
| 10 Dexmethylphenidate HCl; Serdexmethylphenidate chloride (Azstarys) | Commave Therap   | Central nervous system (CNS) stimulant                                                                          | Attention deficit hyperactivity disorder (ADHD)                                                     | 03/02/2021    | S      |
| 11 Tivozanib HCl (Fotivda)                                           | Aveo Pharms      | VEGFRs inhibitor                                                                                                | Advanced renal cell carcinoma                                                                       | 03/10/2021    | S      |
| 12 Ponesimod (Ponvory)                                               | Janssen Pharms   | Sphingosine 1- phosphate (S1P) receptor modulator                                                               | Relapsing multiple sclerosis                                                                        | 03/18/2021    | S      |
| 13 Dasiglucagon HCl (Zegalogue)                                      | Zealand Pharma   | Glucagon receptor agonist                                                                                       | Severe hypoglycemia                                                                                 | 03/22/2021    | S      |
| 14 Viloxazine HCl (Qelbree)                                          | Supernus         | Selective norepinephrine reuptake inhibitor (NRI)                                                               | Attention deficit hyperactivity disorder (ADHD)                                                     | 04/02/2021    | S      |
| 15 Drospirenone; Estetrol (Nextstellis)                              | Mayne Pharma     | Spirolactone and estrogen analog                                                                                | Contraception                                                                                       | 04/15/2021    | S      |
| 16 Pegcetacoplan (Empaveli)                                          | Apellis          | Complement protein C3 inhibitor                                                                                 | Paroxysmal nocturnal hemoglobinuria (PNH)                                                           | 05/14/2021    | P, O   |
| 17 Piflufolastat F-18 (Pylarify)                                     | Progenics        | <sup>18</sup> F labelled prostate-specific membrane antigen (PSMA) imaging agent                                | Prostate cancer imaging                                                                             | 05/26/2021    | P      |
| 18 Olanzapine; Samidorphan L-malate (Lybalvi)                        | Alkermes         | Atypical antipsychotic and opioid antagonist                                                                    | Schizophrenia and bipolar I disorder                                                                | 05/28/2021    | S      |
| 19 Infigratinib phosphate (Truseltiq)                                | Helsinn Hlthcare | FGFR1-3 inhibitor                                                                                               | Advanced cholangiocarcinoma with <i>FGFR2</i> fusions/rearrangements                                | 05/28/2021    | P, O   |
| 20 Sotorasib (Lumakras)                                              | Amgen            | KRAS <sup>G12C</sup> inhibitor                                                                                  | KRAS <sup>G12C</sup> -mutated NSCLC                                                                 | 05/28/2021    | P, O   |
| 21 Ibrexafungerp citrate (Brexafemme)                                | Scynexis         | Triterpenoid antifungal                                                                                         | Vulvovaginal candidiasis                                                                            | 06/01/2021    | P      |
| 22 Finerenone (Kerendia)                                             | Bayer            | Non-steroidal mineralocorticoid receptor (MR) antagonist                                                        | Chronic kidney disease (CKD) with type 2 diabetes                                                   | 07/09/2021    | P      |
| 23 Fexinidazole (Fexinidazole)                                       | Sanofi           | Nitroimidazole antimicrobial                                                                                    | Sleeping sickness                                                                                   | 07/16/2021    | P, O   |
| 24 Belumosudil mesylate (Rezurock)                                   | Kadmon           | Rho-associated coiled-coil-containing protein kinase 2 (ROCK2) kinase inhibitor                                 | Chronic graft-versus-host disease (GVHD)                                                            | 07/16/2021    | P, O   |
| 25 Odevixibat (Bylvay)                                               | Albireo          | Ileal bile acid transporter (IBAT) inhibitor                                                                    | Pruritus in progressive familial intrahepatic cholestasis (PFIC)                                    | 07/20/2021    | P, O   |
| 26 Belzutifan (Welireg)                                              | Merck & Co       | Hypoxia-inducible factor 2α (HIF-2α) inhibitor                                                                  | von Hippel-Lindau (VHL) disease                                                                     | 08/13/2021    | P, O   |
| 27 Difelikefalin (Korsuva)                                           | Cara Therap      | κ-Opioid receptor agonist                                                                                       | Pruritus associated with chronic kidney disease (CKD)                                               | 08/23/2021    | P      |
| 28 Mobocertinib succinate (Exkivity)                                 | Takeda           | EGFR kinase inhibitor                                                                                           | EGFR exon 20-mutated NSCLC                                                                          | 09/15/2021    | P, O   |
| 29 Atogepant (Qulipta)                                               | AbbVie           | Calcitonin gene-related peptide (CGRP) receptor antagonist                                                      | Episodic migraine                                                                                   | 09/28/2021    | S      |
| 30 Maralixibat chloride (Livmarli)                                   | Mirum            | Ileal bile acid transporter (IBAT) inhibitor                                                                    | Pruritus in Alagille syndrome                                                                       | 09/29/2021    | P, O   |
| 31 Avacopan (Tavneos)                                                | ChemoCentryx     | Complement 5a receptor antagonist                                                                               | Anti-neutrophil cytoplasmic (auto)antibody (ANCA)-associated vasculitis                             | 10/07/2021    | S, O   |
| 32 Asciminib HCl (Scemblix)                                          | Novartis         | ABL/BCR-ABL1 kinase inhibitor                                                                                   | Philadelphia chromosome-positive chronic myeloid leukemia (Ph+ CML)                                 | 10/29/2021    | P, O   |
| 33 Vosoritide (Voxzogo)                                              | Biomarin         | C-type natriuretic peptide (CNP) analog                                                                         | Achondroplasia                                                                                      | 11/19/2021    | P, O   |
| 34 Maribavir (Livtency)                                              | Takeda           | Cytomegalovirus (CMV) pUL97 kinase inhibitor                                                                    | Post-transplant CMV infection                                                                       | 11/23/2021    | P, O   |
| 35 Pafolacianine sodium (Cytalux)                                    | On Target Labs   | Fluorescent folate receptor α (FRα) imaging agent                                                               | Ovarian cancer imaging                                                                              | 11/29/2021    | P, O   |
| 36 Inclisiran sodium (Leqvio)                                        | Novartis         | Proprotein convertase subtilisin-kexin type 9 (PCSK9)-targeted siRNA                                            | Heterozygous familial hypercholesterolemia (HeFH) or atherosclerotic cardiovascular disease (ASCVD) | 12/22/2021    | S      |
| <b>2021 Biologics license applications = 14</b>                      |                  |                                                                                                                 |                                                                                                     |               |        |
| 1 Evinacumab (Evekeza)                                               | Regeneron        | Angiopoetin-like protein 3 (ANGPTL3)-directed mAb                                                               | Homozygous familial hypercholesterolemia (HoFH)                                                     | 02/11/2021    | P, O   |
| 2 Dostarlimab (Jemperli)                                             | GlaxoSmithKline  | PD1-directed mAb                                                                                                | Endometrial cancer                                                                                  | 04/22/2021    | P      |



## Supplementary data: Table 1 – FDA-approved drugs (Continued)

| Drug (brand name)                               | Sponsor          | Properties                                       | Indication                                                                                                                      | Approval date | Review |
|-------------------------------------------------|------------------|--------------------------------------------------|---------------------------------------------------------------------------------------------------------------------------------|---------------|--------|
| <b>2021 Biologics license applications = 14</b> |                  |                                                  |                                                                                                                                 |               |        |
| 3 Loncastximab tesirine (Zynlonta)              | ADC Therapeutics | CD19-directed ADC                                | B-cell lymphoma                                                                                                                 | 04/23/2021    | P, O   |
| 4 Amivantamab (Rybrevant)                       | Janssen Biotech  | EGFR- and MET-bispecific antibody                | EGFR exon 20-mutated NSCLC                                                                                                      | 05/21/2021    | P      |
| 5 Aducanumab (Aduhelm)                          | Biogen           | Amyloid- $\beta$ -directed mAb                   | Alzheimer's disease                                                                                                             | 06/07/2021    | P      |
| 6 Asparaginase erwinia chrysanthemi (Rylaze)    | Jazz             | Recombinant asparagine-specific enzyme           | Acute lymphoblastic leukaemia (ALL), and lymphoblastic lymphoma (LBL), in patients allergic to <i>E. coli</i> -derived products | 06/30/2021    | S, O   |
| 7 Anifrolumab (Saphnelo)                        | AstraZeneca      | Type 1 interferon receptor (IFNAR)-targeted mAb  | Systemic lupus erythematosus (SLE)                                                                                              | 07/30/2021    | S      |
| 8 Avalglucosidase alfa (Nexviazyme)             | Genzyme          | Recombinant $\alpha$ -glucosidase                | Pompe disease                                                                                                                   | 08/06/2021    | P, O   |
| 9 Lonapegsomatropin (Skytrofa)                  | Ascendis Pharma  | PEGylated human growth hormone                   | Growth failure due to growth hormone deficiency (GHD)                                                                           | 08/25/2021    | S, O   |
| 10 Tisotumab vedotin (Tivdak)                   | Seagen           | Tissue-factor-targeted ADC                       | Cervical cancer                                                                                                                 | 09/20/2021    | P, O   |
| 11 Ropeginterferon alfa-2b (Besremi)            | PharmaEssentia   | PEGylated interferon $\alpha$ -2b                | Polycythemia vera                                                                                                               | 11/12/2021    | S, O   |
| 12 Efgartigimod alfa (Vyvgart)                  | Argenx           | Neonatal Fc receptor (FcRn)-binding Fc fragment  | Myasthenia gravis                                                                                                               | 12/17/2021    | S, O   |
| 13 Tezepelumab (Tezspire)                       | AstraZeneca      | Thymic stromal lymphopoietin (TSLP)-directed mAb | Severe asthma                                                                                                                   | 12/17/2021    | P      |
| 14 Tralokinumab (Adbry)                         | LEO Pharma       | LEO Pharma Interleukin-13 (IL-13)-directed mAb   | Atopic dermatitis                                                                                                               | 12/27/2021    | S      |

## Supplementary data: Table 2 – FDA-approved cancer drugs

| Drug (brand name)                               | Sponsor           | Properties                                                                     | Indication                                                                                      | Approval date | Review |
|-------------------------------------------------|-------------------|--------------------------------------------------------------------------------|-------------------------------------------------------------------------------------------------|---------------|--------|
| 1991 New molecular entities = 5                 |                   |                                                                                |                                                                                                 |               |        |
| 1 Ondansetron HCl (Zofran)                      | Novartis          | 5-HT <sub>3</sub> receptor antagonist                                          | Nausea and vomiting caused by radiotherapy, anesthesia, surgery or cytotoxic chemotherapy drugs | 01/04/1991    | P      |
| 2 Gallium nitrate (Ganite)                      | Chapter 7 Trustee | Bone-resorption inhibitor                                                      | Hypercalcemia of malignancy                                                                     | 01/17/1991    | P, O   |
| 3 Fludarabine phosphate (Fludara)               | Genzyme Corp      | DNA synthesis inhibitor                                                        | B-cell chronic lymphocytic leukemia                                                             | 04/18/1991    | P      |
| 4 Pentostatin (Nipent)                          | Hospira           | Purine analog, irreversible inhibitor of adenosine deaminase                   | INF $\alpha$ -refractory hairy cell leukemia                                                    | 10/11/1991    | P, O   |
| 5 Pamidronate disodium (Aredia)                 | Novartis          | Bone-resorption inhibitor                                                      | Hypercalcemia of malignancy                                                                     | 10/31/1991    | P      |
| 1991 Biologics license applications = 2         |                   |                                                                                |                                                                                                 |               |        |
| 1 Filgrastim (Neupogen)                         | Amgen             | Recombinant human granulocyte colony-stimulating factor (G-CSF)                | Severe neutropenia in patients with non-myeloid malignancies                                    | 02/20/1991    | N/A    |
| 2 Sargramostim (Leukine)                        | Berlex Labs       | Recombinant human granulocyte macrophage colony-stimulating factor (GM-CSF)    | Myeloid reconstitution after PBPC/bone marrow transplantation, or with NHL, ALL, HL             | 03/05/1991    | O      |
| 1992 New molecular entities = 2                 |                   |                                                                                |                                                                                                 |               |        |
| 1 Teniposide (Vumon)                            | HQ spcIt Pharma   | Topoisomerase II inhibitor                                                     | Refractory childhood acute lymphoblastic leukemia                                               | 07/14/1992    | P, O   |
| 2 Paclitaxel (Taxol)                            | HQ SpcIt Pharma   | Microtubule-stabilizing agent                                                  | Advanced ovarian cancer                                                                         | 12/29/1992    | P, O   |
| 1992 Biologics license applications = 2         |                   |                                                                                |                                                                                                 |               |        |
| 1 Aldesleukin (Proleukin)                       | Chiron            | Recombinant human interleukin-2                                                | Metastatic renal cell carcinoma                                                                 | 05/05/1992    | O      |
| 2 Indium In-111 satumomab pentetide (OncoScint) | Cytogen           | TAG-72-specific radiolabeled mAb                                               | Imaging of colorectal or ovarian cancer                                                         | 12/29/1992    | O      |
| 1993 New molecular entities = 3                 |                   |                                                                                |                                                                                                 |               |        |
| 1 Cladribine (Leustatin)                        | Janssen Pharms    | Adenosine deaminase inhibitor                                                  | Hairy cell leukemia and multiple sclerosis                                                      | 02/26/1993    | S      |
| 2 Strontium chloride Sr-89 (Metastron)          | Q Biomed          | A radiopharmaceutical that concentrates in the bone of invaded tumor           | Bone metastasis of tumor induced pain                                                           | 06/18/1993    | P      |
| 3 Granisetron HCl (Kytrel)                      | Roche             | 5-HT <sub>3</sub> receptor agonist                                             | Chemotherapy-induced nausea                                                                     | 12/29/1993    | S      |
| 1994 New molecular entities = 4                 |                   |                                                                                |                                                                                                 |               |        |
| 1 Iobenguane sulfate I-131                      | Pharmalucence     | Radiopharmaceutical                                                            | Location of pheochromocytomas and neuroblastomas                                                | 03/25/1994    | P      |
| 2 Indium In-111 pentetreotide kit (Octreoscan)  | Curium            | Radioactive diagnostic agent                                                   | Location of metastatic neuroblastomas                                                           | 06/02/1994    | P      |
| 3 Technetium Tc-99m bicasate kit (Neurolite)    | Lantheus Medcl    | Radioactive diagnostic agent                                                   | Localization of neuroendocrine tumors bearing somatostatin receptors                            | 11/23/1994    | S      |
| 4 Vinorelbine tartrate (Navelbine)              | Pierre Fabre      | Microtubule-destabilizing agent                                                | Non-small-cell lung cancer (NSCLC)                                                              | 12/23/1994    | P      |
| 1994 Biologics license applications = 1         |                   |                                                                                |                                                                                                 |               |        |
| 1 Pegaspargase (Oncaspar)                       | Sigma Tau         | <i>Escherichia coli</i> -derived L-asparaginase                                | Pediatric acute lymphoblastic leukaemia                                                         | 02/01/1994    | O      |
| 1995 New molecular entities = 5                 |                   |                                                                                |                                                                                                 |               |        |
| 1 Dexrazoxane HCl (Zincard)                     | Pfizer            | DNA topoisomerase II inhibitor and iron ions chelator                          | Doxorubicin-caused cardiomyopathy in patients with breast cancer                                | 05/26/1995    | P, O   |
| 2 Bicalutamide (Casodex)                        | Ani Pharms        | Androgen receptor antagonist                                                   | Advanced prostate cancer                                                                        | 10/04/1995    | S      |
| 3 Amifostine (Ethyol)                           | Clinigen          | Binds to and detoxifies cytotoxic platinum-containing metabolites of cisplatin | Cisplatin caused cumulative renal toxicity in patients with ovarian cancer                      | 12/08/1995    | P, O   |
| 4 Porfimer sodium (Photofrin)                   | Pinnacle Biologs  | A photosensitizer used for photodynamic therapy                                | Advanced esophageal cancer                                                                      | 12/27/1995    | P, O   |
| 5 Anastrozole (Arimidex)                        | Ani Pharms        | Aromatase inhibitor                                                            | Advanced breast cancer in post-menopausal women                                                 | 12/27/1995    | S      |

## Supplementary data: Table 2 – FDA-approved cancer drugs (Continued)

| Drug (brand name)                                    | Sponsor              | Properties                                                                                                                                     | Indication                                                                                                                                | Approval date | Review |
|------------------------------------------------------|----------------------|------------------------------------------------------------------------------------------------------------------------------------------------|-------------------------------------------------------------------------------------------------------------------------------------------|---------------|--------|
| 1996 New molecular entities = 5                      |                      |                                                                                                                                                |                                                                                                                                           |               |        |
| 1 Docetaxel (Taxotere)                               | Sanofi               | Microtubule-stabilizing agent                                                                                                                  | Locally advanced or metastatic breast cancer                                                                                              | 05/14/1996    | P      |
| 2 Gemcitabine HCl (Gemzar)                           | Eli Lilly            | DNA synthesis inhibitor                                                                                                                        | Locally advanced or metastatic pancreatic cancer                                                                                          | 05/15/1996    | P      |
| 3 Topotecan HCl (Hycamtin)                           | Novartis             | DNA topoisomerases inhibitor                                                                                                                   | Relapsed small cell lung cancer                                                                                                           | 05/28/1996    | P      |
| 4 Irinotecan HCl (Camptosar)                         | Pfizer               | Topoisomerase I inhibitor                                                                                                                      | Metastatic colorectal cancer                                                                                                              | 06/14/1996    | P      |
| 5 Nilutamide (Nilandron)                             | Concordia            | Androgen receptor antagonist                                                                                                                   | Metastatic prostate cancer                                                                                                                | 09/19/1996    | S      |
| 1996 Biologics license applications = 3              |                      |                                                                                                                                                |                                                                                                                                           |               |        |
| 1 Arcitumomab (CEA-Scan)                             | Immunomedics         | <sup>99m</sup> Tc labelled anti-CEA mouse IgG1 (Fab)                                                                                           | Recurrent colorectal cancer imaging                                                                                                       | 06/28/1996    | O      |
| 2 Nofetumomab merpentan (Verluma)                    | Boehringer Ingelheim | <sup>99m</sup> Tc labelled anti-EpCAM (and/or CD20/MS4A1) mouse IgG2b (Fab)                                                                    | Small cell lung cancer imaging                                                                                                            | 8/20/1996     | N/A    |
| 3 Capromab pendetide (Prostascint)                   | Cytogen              | <sup>111</sup> In labelled anti-PSMA mouse mAb                                                                                                 | Diagnosis of metastatic prostate cancer                                                                                                   | 10/28/1996    | N/A    |
| 1997 New molecular entities = 6                      |                      |                                                                                                                                                |                                                                                                                                           |               |        |
| 1 Anagrelide HCl (Agrylin)                           | Takeda               | Phosphodiesterase 3 (PDE3) and phospholipase A2 (PLA2) inhibitor                                                                               | Thrombocytopenia, secondary to myeloproliferative neoplasms                                                                               | 12/06/1996    | S      |
| 2 Samarium Sm-153 lexidronam pentasodium (Quadramet) | Lantheus Medical     | <sup>153</sup> Sm labelled Radiopharmaceutical, chelator moiety associates with hydroxyapatite crystals concentrated in areas of bone turnover | Bone metastasis of tumor induced pain                                                                                                     | 03/28/1997    | S      |
| 3 Toremifene citrate (Fareston)                      | Kyowa kirin          | Estrogen receptor (ER) inhibitor                                                                                                               | ER-positive metastatic breast cancer                                                                                                      | 05/29/1997    | S, O   |
| 4 Letrozole (Femara)                                 | Novartis             | Aromatase inhibitor                                                                                                                            | Advanced breast cancer                                                                                                                    | 07/25/1997    | S      |
| 5 Dolasetron mesylate (Anzemet)                      | Validus Pharms       | 5-HT <sub>3</sub> receptor antagonist                                                                                                          | Chemotherapy-induced nausea and vomiting                                                                                                  | 09/11/1997    | S      |
| 6 Mangafodipir trisodium (Teslascan)                 | IC Targets           | MRI contrast agent                                                                                                                             | Imaging of liver lesions with suspected metastatic disease or hepatocellular carcinomas                                                   | 11/26/1997    | S      |
| 1997 Biologics license applications = 2              |                      |                                                                                                                                                |                                                                                                                                           |               |        |
| 1 Oprelvekin (Neumega)                               | Genetics institute   | Recombinant human interleukin-11 (IL-11)                                                                                                       | Chemotherapy-induced thrombocytopenia                                                                                                     | 11/25/1997    | N/A    |
| 2 Rituximab (Rituxan)                                | Genentech            | CD20-directed mAb                                                                                                                              | B-cell non-Hodgkin's lymphoma                                                                                                             | 11/26/1997    | O      |
| 1998 New molecular entities = 2                      |                      |                                                                                                                                                |                                                                                                                                           |               |        |
| 1 Capecitabine (Xeloda)                              | Roche                | Prodrug of 5-FU                                                                                                                                | Metastatic breast cancer                                                                                                                  | 04/30/1998    | P      |
| 2 Valrubicin (Valstar)                               | Endo Pharm           | A semisynthetic analog of anthracycline doxorubicin                                                                                            | BCG-refractory CIS of urinary bladder cancer                                                                                              | 09/25/1998    | P, O   |
| 1998 Biologics license applications = 2              |                      |                                                                                                                                                |                                                                                                                                           |               |        |
| 1 Trastuzumab (Herceptin)                            | Genentech            | HER2-directed mAb                                                                                                                              | HER2-positive breast cancer                                                                                                               | 09/25/1998    | P      |
| 2 Thyrotropin alfa (Thyrogen)                        | Genzyme              | Recombinant human thyroid stimulating hormone                                                                                                  | Diagnostic testing for thyroid tissue remnants following radioiodine ablation, and alongside radioactive agents to destroy thyroid tissue | 11/30/1998    | O      |
| 1999 New molecular entities = 6                      |                      |                                                                                                                                                |                                                                                                                                           |               |        |
| 1 Alitretinoin (Panretin)                            | Concordia            | 9-cis-retinoic acid, a form of vitamin A                                                                                                       | AIDS-related Kaposi's sarcoma                                                                                                             | 02/02/1999    | P, O   |
| 2 Technetium Tc-99m depreotide (Neo tect kit)        | Cis Bio Intl         | <sup>99m</sup> Tc labelled radioactive diagnostic agent                                                                                        | Imaging of malignant lung tumors in patients with highly suspect for malignancy                                                           | 08/03/1999    | P      |
| 3 Temozolomide (Temodar)                             | Merck & Co           | DNA alkylating agent                                                                                                                           | Glioblastoma                                                                                                                              | 08/11/1999    | P, O   |
| 4 Epirubicin HCl (Ellence)                           | Pfizer               | DNA topoisomerase II inhibitor                                                                                                                 | Primary breast cancer with axillary node tumor involvement                                                                                | 09/15/1999    | P, O   |
| 5 Exemestane (Aromasin)                              | Pfizer               | Aromatase inhibitor                                                                                                                            | ER-positive early breast cancer                                                                                                           | 10/21/1999    | S, O   |
| 6 Bexarotene (Targretin)                             | Valeant Luxembourg   | Retinoid, ligand of retinoid X receptors (RXRs)                                                                                                | Cutaneous T-cell lymphoma                                                                                                                 | 12/29/1999    | P, O   |
| 1999 Biologics license applications = 1              |                      |                                                                                                                                                |                                                                                                                                           |               |        |
| 1 Denileukin difitox (Ontak)                         | Eisai                | Fusion protein consisting of diphtheria toxin fragments and interleukin-2                                                                      | Cutaneous T-cell lymphoma                                                                                                                 | 02/05/1999    | O      |

## Supplementary data: Table 2 – FDA-approved cancer drugs (Continued)

| Drug (brand name)                       | Sponsor      | Properties                                     | Indication                                                                                                                     | Approval date | Review |
|-----------------------------------------|--------------|------------------------------------------------|--------------------------------------------------------------------------------------------------------------------------------|---------------|--------|
| 2000 New molecular entities = 2         |              |                                                |                                                                                                                                |               |        |
| 1 Triptorelin pamoate (Trelstar)        | Verity       | GnRH agonist                                   | Advanced prostate cancer                                                                                                       | 06/15/2000    | S      |
| 2 Arsenic trioxide (Trisenox)           | Cephalon     | Degradation of PML-RAR $\alpha$ fusion protein | Acute promyelocytic leukemia characterized by the presence of the t (15; 17) translocation or PML/RAR $\alpha$ gene expression | 09/25/2000    | P, O   |
| 2000 Biologics license applications = 1 |              |                                                |                                                                                                                                |               |        |
| 1 Gemtuzumab ozogamicin (Mylotarg)      | Wyeth Pharms | CD33-directed antibody-drug conjugate (ADC)    | Relapsed or refractory CD33-positive acute myeloid leukemia (AML)                                                              | 05/17/2000    | O      |

| Drug (brand name)                       | Sponsor  | Properties                | Indication                          | Approval date | Review |
|-----------------------------------------|----------|---------------------------|-------------------------------------|---------------|--------|
| 2001 New molecular entities = 2         |          |                           |                                     |               |        |
| 1 Imatinib mesylate (Gleevec)           | Novartis | Tyrosine kinase inhibitor | Chronic myeloid leukemia            | 05/10/2001    | P      |
| 2 Zoledronic acid (Zometa)              | Novartis | Bone-resorption inhibitor | Hypercalcemia of malignancy         | 08/20/2001    | P, O   |
| 2001 Biologics license applications = 1 |          |                           |                                     |               |        |
| 1 Alemtuzumab (Campath)                 | Genzyme  | CD52-directed mAb         | B-cell chronic lymphocytic leukemia | 05/07/2001    | O      |

| Drug (brand name)                       | Sponsor     | Properties                                                                        | Indication                                                               | Approval date | Review |
|-----------------------------------------|-------------|-----------------------------------------------------------------------------------|--------------------------------------------------------------------------|---------------|--------|
| 2002 New molecular entities = 2         |             |                                                                                   |                                                                          |               |        |
| 1 Fulvestrant (Faslodex)                | AstraZeneca | Estrogen receptor antagonist                                                      | HR-positive metastatic breast cancer                                     | 04/25/2002    | S      |
| 2 Oxaliplatin (Eloxatin)                | Sanofi      | Organoplatinum alkylating agent, increases tumor response rate to chemotherapy    | Colorectal cancer (in combination with 5-fluorouracil and leucovorin)    | 08/09/2002    | P      |
| 2002 Biologics license applications = 2 |             |                                                                                   |                                                                          |               |        |
| 1 Pegfilgrastim (Neulasta)              | Amgen       | PEGylated form of recombinant human granulocyte colony-stimulating factor (G-CSF) | Febrile neutropenia or myelosuppressive chemotherapy-induced neutropenia | 01/31/2002    | N/A    |
| 2 Ibritumomab tiuxetan (Zevalin)        | IDEC Pharms | <sup>111</sup> In and <sup>90</sup> Y labelled CD20-specific radiotherapeutic mAb | B-cell non-Hodgkin's lymphoma                                            | 02/19/2002    | O      |

| Drug (brand name)                                   | Sponsor             | Properties                            | Indication                         | Approval date | Review |
|-----------------------------------------------------|---------------------|---------------------------------------|------------------------------------|---------------|--------|
| 2003 New molecular entities = 5                     |                     |                                       |                                    |               |        |
| 1 Aprepitant (Eemend)                               | Merck & Co          | NK1 receptor antagonist               | Chemotherapy-induced nausea        | 03/26/2003    | P      |
| 2 Gefitinib (Iressa)                                | AstraZeneca         | EGFR kinase inhibitor                 | Non-small-cell lung cancer (NSCLC) | 05/05/2003    | P      |
| 3 Bortezomib (Velcade)                              | Takeda Pharms       | Proteasome inhibitor                  | Multiple myeloma                   | 05/13/2003    | P, O   |
| 4 Palonosetron HCl (Aloxi)                          | Helsinn             | 5-HT <sub>3</sub> receptor antagonist | Chemotherapy-induced nausea        | 07/25/2003    | S      |
| 5 Abarelix (Plenaxis)                               | Speciality European | GnRH receptor antagonist              | Advanced prostate cancer           | 11/25/2003    | P      |
| 2003 Biologics license applications = 1             |                     |                                       |                                    |               |        |
| 1 Tositumomab and iodine I-131 tositumomab (Bexxar) | Corixa              | CD20-directed radiotherapeutic mAb    | Non-Hodgkin's lymphoma             | 06/30/2003    | P, O   |

| Drug (brand name)                       | Sponsor    | Properties                                         | Indication                                          | Approval date | Review |
|-----------------------------------------|------------|----------------------------------------------------|-----------------------------------------------------|---------------|--------|
| 2004 New molecular entities = 3         |            |                                                    |                                                     |               |        |
| 1 Pemetrexed disodium (Alimta)          | Eli Lilly  | Folate analog                                      | Malignant pleural mesothelioma                      | 02/04/2004    | P, O   |
| 2 Erlotinib HCl (Tarceva)               | OSI Pharms | EGFR inhibitor                                     | Non-small-cell lung cancer (NSCLC)                  | 11/18/2004    | P      |
| 3 Clofarabine (Clolar)                  | Genzyme    | Nucleoside antimetabolite, DNA synthesis inhibitor | Relapsed or refractory acute lymphoblastic leukemia | 12/28/2004    | P, O   |
| 2004 Biologics license applications = 3 |            |                                                    |                                                     |               |        |
| 1 Cetuximab (Erbix)                     | ImClone    | EGFR-directed mAb                                  | Colorectal cancer                                   | 02/12/2004    | N/A    |
| 2 Bevacizumab (Avastin)                 | Genentech  | VEGF-A-directed mAb                                | Colorectal cancer                                   | 02/26/2004    | O      |
| 3 Palifermin (Kepivance)                | Biovitrum  | Recombinant human keratinocyte growth factor       | Oral mucositis following radiation or chemotherapy  | 12/15/2004    | N/A    |

## Supplementary data: Table 2 – FDA-approved cancer drugs (Continued)

| Drug (brand name)                       | Sponsor              | Properties                                                                              | Indication                                                                                      | Approval date | Review |
|-----------------------------------------|----------------------|-----------------------------------------------------------------------------------------|-------------------------------------------------------------------------------------------------|---------------|--------|
| 2005 New molecular entities = 2         |                      |                                                                                         |                                                                                                 |               |        |
| 1 Nelarabine (Arranon)                  | Novartis             | Purine nucleoside analog, inhibits the DNA elongation                                   | T-cell acute lymphoblastic leukaemia and T-cell lymphoblastic lymphoma                          | 10/28/2005    | P, O   |
| 2 Sorafenib tosylate (Nexavar)          | Bayer                | Multi-target TKI (VEGFR2/3, PDGFR $\beta$ , FLT3, KIT, RAF1, and BRAF)                  | Advanced renal cell carcinoma                                                                   | 12/01/2005    | P, O   |
| 2006 New molecular entities = 3         |                      |                                                                                         |                                                                                                 |               |        |
| 1 Sunitinib malate (Sutent)             | CPPI CV              | Multi-target TKI (VEGFRs, PDGFR $\alpha/\beta$ , CSF1R, KIT, and FLT3)                  | Imatinib-resistant gastrointestinal stromal tumor and advanced renal cell carcinoma             | 01/26/2006    | P      |
| 2 Dasatinib (Sprycel)                   | Bristol-Myers Squibb | Tyrosine kinase inhibitor                                                               | Chronic myeloid leukemia                                                                        | 06/28/2006    | P, O   |
| 3 Vorinostat (Zolinza)                  | Merck & Co           | Histone deacetylase inhibitor                                                           | Cutaneous T-cell lymphoma                                                                       | 10/06/2006    | P, O   |
| 2006 Biologics license applications = 1 |                      |                                                                                         |                                                                                                 |               |        |
| 1 Panitumumab (Vectibix)                | Amgen                | EGFR-directed mAb                                                                       | EGFR-expressing metastatic colorectal carcinoma                                                 | 09/27/2006    | N/A    |
| 2007 New molecular entities = 4         |                      |                                                                                         |                                                                                                 |               |        |
| 1 Lapatinib Ditosylate (Tykerb)         | Novartis             | HER2 and EGFR inhibitor                                                                 | Advanced or metastatic breast cancer (HER2-positive)                                            | 03/13/2007    | P      |
| 2 Temsirolimus (Torisel)                | Merck & Co           | Mammalian target of rapamycin (mTOR) inhibitor                                          | Advanced renal cell carcinoma                                                                   | 05/30/2007    | P, O   |
| 3 Ixabepilone (Ixempra)                 | R-Pharm US           | Microtubule-stabilizing agent                                                           | Advanced or metastatic breast cancer                                                            | 10/16/2007    | P      |
| 4 Nilotinib HCl (Tasigna)               | Novartis             | BCR-ABL kinase inhibitor                                                                | Chronic myelogenous leukemia                                                                    | 10/29/2007    | S, O   |
| 2008 New molecular entities = 5         |                      |                                                                                         |                                                                                                 |               |        |
| 1 Fosaprepitant dimeglumine (Eemend)    | Merck & Co           | Prodrug of aprepitant, NK1 receptor antagonist                                          | Nausea and vomiting caused by chemotherapy                                                      | 01/25/2008    | S      |
| 2 Bendamustine HCl (Treanda)            | Cephalon             | Mechlorethamine derivative with DNA-alkylating activity                                 | Chronic lymphocytic leukemia                                                                    | 03/20/2008    | P, O   |
| 3 Iobenguane sulfate I-123 (AdreView)   | GE Healthcare        | Taken up by the noradrenaline transporter in adrenergic nerve terminals                 | Radiopharmaceutical agent, detection of primary or metastatic pheochromocytoma or neuroblastoma | 09/19/2008    | P, O   |
| 4 Plerixafor (Mozobil)                  | Genzyme              | CXCR4 antagonist                                                                        | Autologous transplantation in patients with non-Hodgkin's lymphoma and multiple myeloma         | 12/15/2008    | P, O   |
| 5 Degarelix acetate (Firmagon)          | Ferring              | GnRH receptor antagonist                                                                | Advanced prostate cancer                                                                        | 12/24/2008    | S      |
| 2009 New molecular entities = 4         |                      |                                                                                         |                                                                                                 |               |        |
| 1 Everolimus (Afinitor)                 | Novartis             | Mammalian target of rapamycin (mTOR) inhibitor                                          | Advanced renal cell carcinoma                                                                   | 03/30/2009    | P      |
| 2 Pralatrexate (Folotyn)                | Acrotech             | Folate analogue metabolic inhibitor that competitively inhibits dihydrofolate reductase | Peripheral T cell lymphoma                                                                      | 09/24/2009    | P, O   |
| 3 Pazopanib HCl (Votrient)              | Novartis             | Multi-target TKI (VEGFRs, PDGFR $\alpha/\beta$ , FGFR1/2, KIT)                          | Advanced renal cell carcinoma                                                                   | 10/19/2009    | S      |
| 4 Romidepsin (Istodax)                  | Celgene              | Histone deacetylase inhibitor                                                           | Cutaneous T-cell lymphoma                                                                       | 11/05/2009    | S      |
| 2009 Biologics license applications = 1 |                      |                                                                                         |                                                                                                 |               |        |
| 1 Ofatumumab (Arzerra)                  | Novartis             | CD20-directed mAb                                                                       | Chronic lymphocytic leukemia                                                                    | 10/26/2009    | P, O   |
| 2010 New molecular entities = 2         |                      |                                                                                         |                                                                                                 |               |        |
| 1 Cabazitaxel (Jevtana kit)             | Sanofi               | Microtubule-stabilizing agent                                                           | Prostate cancer                                                                                 | 06/17/2010    | P      |
| 2 Eribulin mesylate (Halaven)           | Eisai                | Microtubule-destabilizing agent                                                         | Breast cancer                                                                                   | 11/15/2010    | P      |

## Supplementary data: Table 2 – FDA-approved cancer drugs (Continued)

| Drug (brand name)                              | Sponsor              | Properties                                             | Indication                                                  | Approval date | Review |
|------------------------------------------------|----------------------|--------------------------------------------------------|-------------------------------------------------------------|---------------|--------|
| 2011 New molecular entities = 4                |                      |                                                        |                                                             |               |        |
| 1 Vandetanib (Caprelsa)                        | Genzyme              | Multi-target TKI (VEGFR2/3, EGFR, and RET)             | Unresectable or metastatic medullary thyroid cancer         | 04/06/2011    | P, O   |
| 2 Abiraterone acetate (Zytiga)                 | Janssen Biotech      | CYP17A1 inhibitor                                      | Metastatic castration-resistant prostate cancer             | 04/28/2011    | P      |
| 3 Vemurafenib (Zelboraf)                       | Roche                | BRAF inhibitor                                         | BRAF-positive unresectable or metastatic melanoma           | 08/17/2011    | P, O   |
| 4 Crizotinib (Xalkori)                         | Merck & Co           | Multi-target TKI (ALK, ROS1, and MET)                  | ALK-positive advanced or metastatic NSCLC                   | 08/26/2011    | P, O   |
| 2011 Biologics license applications = 3        |                      |                                                        |                                                             |               |        |
| 1 Ipilimumab (Yervoy)                          | Bristol-Myers Squibb | Cytotoxic T-lymphocyte antigen 4 (CTLA-4)-directed mAb | Unresectable or metastatic melanoma                         | 03/25/2011    | P, O   |
| 2 Brentuximab vedotin (Adcetris)               | Seattle Genetics     | CD30-directed antibody drug conjugate (ADC)            | Hodgkin's lymphoma; systemic anaplastic large cell lymphoma | 08/19/2011    | P, O   |
| 3 Asparaginase Erwinia chrysanthemi (Erwinaze) | EUSA Pharma (USA)    | <i>Erwinia chrysanthemi</i> -derived L-asparaginase    | Acute lymphoblastic leukemia                                | 11/18/2011    | P, O   |

| Drug (brand name)                       | Sponsor       | Properties                                                                              | Indication                                                           | Approval date | Review |
|-----------------------------------------|---------------|-----------------------------------------------------------------------------------------|----------------------------------------------------------------------|---------------|--------|
| 2012 New molecular entities = 9         |               |                                                                                         |                                                                      |               |        |
| 1 Axitinib (Inlyta)                     | Pfizer        | VEGFRs inhibitor                                                                        | Advanced renal cell carcinoma                                        | 01/27/2012    | S      |
| 2 Vismodegib (Erivedge)                 | Genentech     | Smoothed (Hedgehog pathway) inhibitor                                                   | Metastatic or locally advanced basal cell carcinoma                  | 01/30/2012    | P      |
| 3 Carfilzomib (Kyprolis)                | Onyx Therap   | 20S proteasome inhibitor                                                                | Multiple myeloma                                                     | 07/20/2012    | S, O   |
| 4 Enzalutamide (Xtandi)                 | Astellas      | Androgen receptor inhibitor                                                             | Metastatic castration-resistant prostate cancer                      | 08/31/2012    | P      |
| 5 Bosutinib monohydrate (Bosulif)       | Pfizer        | BCR-ABL inhibitor; SRC family kinase inhibitor                                          | Chronic, accelerated or blast phase Ph+ chronic myelogenous leukemia | 09/04/2012    | S, O   |
| 6 Regorafenib (Stivarga)                | Bayer         | Multi-target TKI (RET, VEGFRs, KIT, PDGFRα/β, FGFR1/2, RAF1, BRAFWT, and BRAFV600E)     | Metastatic colorectal cancer                                         | 09/27/2012    | P      |
| 7 Omacetaxine mepesuccinate (Synribo)   | Teva          | Cephalotaxine, inhibits protein chain elongation by binding the large ribosomal subunit | Chronic or accelerated-phase chronic myeloid leukemia                | 10/26/2012    | S, O   |
| 8 Cabozantinib S-malate (Cometriq)      | Exelixis      | Multi-target TKI (VEGFRs, MET, RET, FLT3, KIT, TIE2, and AXL)                           | Progressive, metastatic medullary thyroid cancer                     | 11/29/2012    | P, O   |
| 9 Ponatinib HCl (Iclusig)               | Takeda        | Multi-kinase inhibitor (BCR-ABL, KIT, RET and FLT3)                                     | Chronic, accelerated or blast-phase chronic myeloid leukemia         | 12/14/2012    | P, O   |
| 2012 Biologics license applications = 3 |               |                                                                                         |                                                                      |               |        |
| 1 Pertuzumab (Perjeta)                  | Genentech     | HER2-directed mAb                                                                       | HER2-positive metastatic breast cancer                               | 06/08/2012    | P      |
| 2 Ziv-aflibercept (Zaltrap)             | Sanofi        | Soluble receptor decoy that binds VEGF-A, VEGF-B, and PlGF                              | Metastatic colorectal cancer                                         | 08/03/2012    | P      |
| 3 Tbo-Filgrastim (Neutroval)            | Sicor Biotech | Methionyl human G-CSF                                                                   | Severe neutropaenia in patients with non-myeloid malignancies        | 08/29/2012    | S      |

| Drug (brand name)                                | Sponsor              | Properties                                                                             | Indication                                                                             | Approval date | Review |
|--------------------------------------------------|----------------------|----------------------------------------------------------------------------------------|----------------------------------------------------------------------------------------|---------------|--------|
| 2013 New molecular entities = 7                  |                      |                                                                                        |                                                                                        |               |        |
| 1 Pomalidomide (Pomalyst)                        | Celgene              | Thalidomide analog, immunomodulatory antineoplastic agent                              | Multiple myeloma                                                                       | 02/08/2013    | S, O   |
| 2 Technetium TC 99m tilmanocept (Lymphoseek kit) | Cardinal Health 414  | <sup>99m</sup> Tc labelled radioactive diagnostic agent                                | Lymphatic mapping in patients with breast cancer or melanoma                           | 03/13/2013    | S      |
| 3 Radium Ra-223 dichloride (Xofigo)              | Bayer                | α-particle-emitting radioactive therapeutic                                            | Castration-resistant prostate cancer                                                   | 05/15/2013    | P      |
| 4 Dabrafenib mesylate (Tafinlar)                 | Novartis             | Kinase inhibitor with activity against BRAFV600E/D/K, wild-type BRAF and other kinases | Unresectable or metastatic melanoma with BRAFV600E mutation                            | 05/29/2013    | S, O   |
| 5 Trametinib dimethyl sulfoxide (Mekinist)       | Novartis             | MEK1 and MEK2 kinase inhibitor                                                         | Unresectable or metastatic melanoma with BRAFV600E mutation                            | 05/29/2013    | S, O   |
| 6 Afatinib dimaleate (Gilotrif)                  | Boehringer Ingelheim | EGFR, HER2, and HER4 inhibitor                                                         | Metastatic NSCLC with EGFR exon 19 deletions or exon 21 (L858R) substitution mutations | 07/12/2013    | P, O   |
| 7 Ibrutinib (Imbruvica)                          | Pharmacyclics        | Bruton's tyrosine kinase inhibitor                                                     | Mantle cell lymphoma                                                                   | 11/13/2013    | P, O   |
| 2013 Biologics license applications = 2          |                      |                                                                                        |                                                                                        |               |        |
| 1 Adu-trastuzumab emtansine (Kadcyla)            | Genentech            | HER2-directed ADC                                                                      | HER2-positive metastatic breast cancer                                                 | 02/22/2013    | P      |
| 2 Obinutuzumab (Gazyva)                          | Genentech            | CD20-directed mAb                                                                      | Previously untreated chronic lymphocytic leukemia                                      | 11/01/2013    | P, O   |

## Supplementary data: Table 2 – FDA-approved cancer drugs (Continued)

| Drug (brand name)                       | Sponsor              | Properties                                                              | Indication                                                                                               | Approval date | Review |
|-----------------------------------------|----------------------|-------------------------------------------------------------------------|----------------------------------------------------------------------------------------------------------|---------------|--------|
| 2014 New molecular entities = 5         |                      |                                                                         |                                                                                                          |               |        |
| 1 Ceritinib (Zykadia)                   | Novartis             | Multi-target TKI (ALK, IGF1R, INSR, and ROS1)                           | ALK-positive metastatic NSCLC                                                                            | 04/29/2014    | P, O   |
| 2 Belinostat (Beleodaq)                 | Acrotech             | Histone-deacetylase inhibitor                                           | Peripheral T-cell lymphoma                                                                               | 07/03/2014    | P, O   |
| 3 Idelalisib (Zydelig)                  | Gilead Sciences      | PI3Kδ inhibitor                                                         | Chronic lymphocytic leukaemia (CLL), B-cell non-Hodgkin's lymphoma, and small lymphocytic lymphoma (SLL) | 07/23/2014    | P, O   |
| 4 Netupitant; Palonosetron HCl (Akinzo) | Helsinn Hlthcare     | NK1-receptor antagonist plus 5-HT <sub>3</sub> receptor antagonist      | Chemotherapy-related nausea                                                                              | 10/10/2014    | S      |
| 5 Olaparib (Lynparza)                   | AstraZeneca          | PARP inhibitor                                                          | Advanced BRCA-mutated ovarian cancer                                                                     | 12/19/2014    | P, O   |
| 2014 Biologics license applications = 4 |                      |                                                                         |                                                                                                          |               |        |
| 1 Ramucirumab (Cyramza)                 | Eli Lilly & Co       | VEGFR2-directed mAb                                                     | Gastric cancer                                                                                           | 04/21/2014    | P, O   |
| 2 Pembrolizumab (Keytruda)              | Merck & Co           | PD1-directed mAb                                                        | Metastatic melanoma                                                                                      | 09/04/2014    | P, O   |
| 3 Blinatumomab (Blincyto)               | Amgen                | CD19- and CD3-bispecific mAb                                            | B-cell precursor acute lymphoblastic leukemia (ALL)                                                      | 12/03/2014    | P, O   |
| 4 Nivolumab (Opdivo)                    | Bristol-Myers Squibb | PD1-directed mAb                                                        | Unresectable or metastatic melanoma                                                                      | 12/22/2014    | P, O   |
| 2015 New molecular entities = 11        |                      |                                                                         |                                                                                                          |               |        |
| 1 Palbociclib (Ibrance)                 | Pfizer               | Cyclin-dependent kinase 4/6 (CDK4/6) inhibitor                          | HER2-negative and HR-positive advanced or metastatic breast cancer                                       | 02/03/2015    | P      |
| 2 Lenvatinib mesylate (Lenvima)         | Eisai                | Multi-target TKI (VEGFRs, FGFRs, PDGFRα, RET, and KIT)                  | Thyroid cancer                                                                                           | 02/13/2015    | P, O   |
| 3 Panobinostat lactate (Farydak)        | Secura               | Histone deacetylase inhibitor                                           | Multiple myeloma                                                                                         | 02/23/2015    | P, O   |
| 4 Sonidegib phosphate (Odomzo)          | Sun Pharma Global    | Smoothed inhibitor                                                      | Basal cell carcinoma                                                                                     | 07/24/2015    | S      |
| 5 Rolapitant HCl (Varubi)               | Tersera              | Neurokinin 1 receptor antagonist                                        | Nausea and vomiting associated with chemotherapy                                                         | 09/01/2015    | S      |
| 6 Tipiracil HCl; Trifluridine (Lonsurf) | Taiho Oncology       | Thymidine phosphorylase inhibitor plus a nucleoside metabolic inhibitor | Colorectal cancer                                                                                        | 09/22/2015    | S      |
| 7 Trabectedin (Yondelis)                | Janssen Prods        | Alkylating drug, interacts with the minor groove of DNA                 | Liposarcoma or leiomyosarcoma                                                                            | 10/23/2015    | P, O   |
| 8 Cobimetinib fumarate (Cotellic)       | Genentech            | MEK inhibitor                                                           | Melanoma with BRAF <sup>V600E/K</sup> mutations                                                          | 11/10/2015    | P, O   |
| 9 Osimertinib mesylate (Tagrisso)       | AstraZeneca          | EGFR inhibitor                                                          | NSCLC with EGFR <sup>T790M</sup> mutations                                                               | 11/13/2015    | P, O   |
| 10 Ixazomib citrate (Ninlaro)           | Takeda               | Oral proteasome inhibitor                                               | Multiple myeloma                                                                                         | 11/20/2015    | P, O   |
| 11 Alectinib HCl (Alecensa)             | Roche                | ALK inhibitor                                                           | Non-small-cell lung cancer (NSCLC)                                                                       | 12/11/2015    | P, O   |
| 2015 Biologics license applications = 4 |                      |                                                                         |                                                                                                          |               |        |
| 1 Dinutuximab (Unituxin)                | United Therap        | GD2-directed mAb                                                        | High-risk neuroblastoma                                                                                  | 03/10/2015    | P, O   |
| 2 Daratumumab (Darzalex)                | Janssen Biotech      | CD38-directed mAb                                                       | Multiple myeloma                                                                                         | 11/16/2015    | P, O   |
| 3 Necitumumab (Portrazza)               | Eli Lilly & Co       | EGFR-directed mAb                                                       | Non-small-cell lung cancer (NSCLC)                                                                       | 11/24/2015    | S, O   |
| 4 Elotuzumab (Empliciti)                | Bristol-Myers Squibb | SLAMF7-directed mAb                                                     | Multiple myeloma                                                                                         | 11/30/2015    | P, O   |
| 2016 New molecular entities = 4         |                      |                                                                         |                                                                                                          |               |        |
| 1 Venetoclax (Venclexta)                | AbbVie               | BCL-2 inhibitor                                                         | Chronic lymphocytic leukemia                                                                             | 04/11/2016    | P, O   |
| 2 Fluciclovine F-18 (Axumin)            | Blue Earth           | <sup>18</sup> F labelled radioactive diagnostic agent                   | Imaging diagnosis of suspected prostate cancer recurrence                                                | 05/27/2016    | P      |
| 3 Gallium dotatate Ga-68 (Netspot)      | AAA USA Inc          | <sup>68</sup> Ga labelled radioactive diagnostic                        | Imaging diagnosis of neuroendocrine tumors                                                               | 06/01/2016    | P, O   |
| 4 Rucaparib camsylate (Rubraca)         | Clovis Oncology      | PARP inhibitor                                                          | BRCA-positive ovarian cancer                                                                             | 12/19/2016    | P, O   |
| 2016 Biologics license applications = 2 |                      |                                                                         |                                                                                                          |               |        |
| 1 Atezolizumab (Tecentriq)              | Genentech            | PDL1-directed mAb                                                       | Advanced or metastatic urothelial carcinoma                                                              | 05/18/2016    | P      |
| 2 Olaratumab (Lartruvo)                 | Eli Lilly & Co       | PDGFRα-directed mAb                                                     | Soft tissue sarcoma                                                                                      | 10/19/2016    | P, O   |

## Supplementary data: Table 2 – FDA-approved cancer drugs (Continued)

| Drug (brand name)                                           | Sponsor                   | Properties                                                                              | Indication                                                                                          | Approval date | Review |
|-------------------------------------------------------------|---------------------------|-----------------------------------------------------------------------------------------|-----------------------------------------------------------------------------------------------------|---------------|--------|
| 2017 New molecular entities = 9                             |                           |                                                                                         |                                                                                                     |               |        |
| 1 Ribociclib succinate (Kisqali)                            | Novartis                  | CDK4/6 inhibitor                                                                        | HR-positive, HER2-negative breast cancer                                                            | 03/13/2017    | P      |
| 2 Niraparib tosylate (Zejula)                               | GlaxoSmithKline           | Poly-ADP ribose polymerase (PARP) inhibitor                                             | Epithelial ovarian, fallopian tube or primary peritoneal cancer                                     | 03/27/2017    | P, O   |
| 3 Brigatinib (Alunbrig)                                     | Takeda                    | Multi-target TKI (ALK, EGFR, IGF1R, FLT3, and ROS1)                                     | ALK-positive NSCLC                                                                                  | 04/28/2017    | P, O   |
| 4 Midostaurin (Rydapt)                                      | Novartis                  | Fms-like tyrosine kinase 3 (FLT3) inhibitor                                             | FLT3-positive acute myeloid leukemia (AML)                                                          | 04/28/2017    | P, O   |
| 5 Neratinib maleate (Nerlynx)                               | Puma Biotech              | EGFR, HER2, and HER4 inhibitor                                                          | HER2-overexpressed breast cancer                                                                    | 07/17/2017    | S      |
| 6 Enasidenib mesylate (Idhifa)                              | Celgene Corp              | IDH2 inhibitor                                                                          | IDH2-mutated acute myeloid leukemia (AML)                                                           | 08/01/2017    | P, O   |
| 7 Copanlisib 2HCl (Aliqopa)                                 | Bayer                     | PI3K $\alpha$ / $\delta$ inhibitor                                                      | Follicular lymphoma (FL)                                                                            | 09/14/2017    | P, O   |
| 8 Abemaciclib (Verzenio)                                    | Eli Lilly & Co            | CDK4/6 inhibitor                                                                        | HR-positive, HER2-negative breast cancer                                                            | 09/28/2017    | P      |
| 9 Acalabrutinib (Calquence)                                 | AstraZeneca               | BTK inhibitor                                                                           | Mantle cell lymphoma                                                                                | 10/31/2017    | P, O   |
| 2017 Biologics license applications = 3                     |                           |                                                                                         |                                                                                                     |               |        |
| 1 Avelumab (Bavencio)                                       | Emd Serono                | PDL1-directed mAb                                                                       | Merkel cell carcinoma                                                                               | 03/23/2017    | P, O   |
| 2 Durvalumab (Imfinzi)                                      | AstraZeneca               | PDL1-directed mAb                                                                       | Urothelial carcinoma                                                                                | 05/01/2017    | P      |
| 3 Inotuzumab ozogamicin (Besponsa)                          | Wyeth Pharms              | CD22-directed ADC                                                                       | B cell precursor acute lymphoblastic leukemia (ALL)                                                 | 08/17/2017    | P, O   |
| 2018 New molecular entities = 13                            |                           |                                                                                         |                                                                                                     |               |        |
| 1 Lutetium dotatate Lu-177 (Lutathera)                      | AAA USA Inc               | Somatostatin receptor-targeted radiopharmaceutical                                      | Gastroenteropancreatic neuroendocrine tumors (GEP-NETs)                                             | 01/26/2018    | P, O   |
| 2 Apalutamide (Erleada)                                     | Janssen Biotech           | Androgen receptor inhibitor                                                             | Prostate cancer                                                                                     | 02/14/2018    | P      |
| 3 Fosnetupitant chloride HCl; Palonosetron HCl (Akyzreo IV) | Helsinn Group             | Neurokinin 1 (NK1) receptor antagonist plus 5-HT <sub>3</sub> receptor antagonist       | Chemotherapy-induced nausea                                                                         | 04/19/2018    | S      |
| 4 Encorafenib (Braftovi)                                    | Array BioPharma           | BRAF inhibitor                                                                          | BRAF-mutated melanoma                                                                               | 06/27/2018    | S, O   |
| 5 Binimetinib (Mektovi)                                     | Array BioPharma           | MEK inhibitor                                                                           | BRAF-mutated melanoma                                                                               | 06/27/2018    | S, O   |
| 6 Ivosidenib (Tibsovo)                                      | Servier                   | Isocitrate dehydrogenase-1 (IDH1) inhibitor                                             | IDH1-mutated acute myeloid leukemia (AML)                                                           | 07/20/2018    | P, O   |
| 7 Duvelisib (Copiktra)                                      | Secura                    | Phosphatidylinositol 3-kinase $\delta$ / $\gamma$ (PI3K $\delta$ / $\gamma$ ) inhibitor | Chronic lymphocytic leukaemia (CLL), follicular lymphoma (FL), and small lymphocytic lymphoma (SLL) | 09/24/2018    | P, O   |
| 8 Dacomitinib (Vizimpro)                                    | Pfizer                    | EGFR inhibitor                                                                          | EGFR-mutated NSCLC                                                                                  | 09/27/2018    | P, O   |
| 9 Talazoparib tosylate (Talzenna)                           | Pfizer                    | Poly-ADP ribose polymerase (PARP) inhibitor                                             | BRCA-mutated HER2-negative breast cancer                                                            | 10/16/2018    | P      |
| 10 Lorlatinib (Lorbrena)                                    | Pfizer                    | Multi-target TKI (ALK and ROS1)                                                         | ALK-positive NSCLC                                                                                  | 11/02/2018    | P, O   |
| 11 Glasdegib maleate (Daurismo)                             | Pfizer                    | Smoothened (Hedgehog pathway) inhibitor                                                 | Acute myeloid leukemia (AML)                                                                        | 11/21/2018    | P, O   |
| 12 Larotrectinib sulfatate (Vitrakvi)                       | Bayer                     | TRKs inhibitor                                                                          | NTRK-positive solid cancers                                                                         | 11/26/2018    | P, O   |
| 13 Gilteritinib fumarate (Xospata)                          | Astellas                  | Fms-like tyrosine kinase 3 (FLT3) inhibitor                                             | FLT3-positive AML                                                                                   | 11/28/2018    | P, O   |
| 2018 Biologics license applications = 4                     |                           |                                                                                         |                                                                                                     |               |        |
| 1 Moxetumomab pasudotox (Lumoxiti)                          | Innate Pharma             | CD22-directed ADC                                                                       | Hairy cell leukemia                                                                                 | 09/13/2018    | P, O   |
| 2 Cemiplimab (Libtayo)                                      | Regeneron Pharmaceuticals | Programmed death receptor-1 (PD1)-directed mAb                                          | Metastatic or locally advanced cutaneous squamous cell carcinoma (CSCC)                             | 09/28/2018    | P      |
| 3 Calaspargase pegol (Asparlas)                             | Servier Pharma            | Asparagine specific enzyme                                                              | Acute lymphoblastic leukemia (ALL)                                                                  | 12/20/2018    | S, O   |
| 4 Tagraxofusp (Elzonris)                                    | Stemline Therapeutics     | IL-3 and diphtheria toxin fusion protein                                                | Blastic plasmacytoid dendritic cell neoplasm                                                        | 12/21/2018    | P, O   |



## Supplementary data: Table 2 – FDA-approved cancer drugs (Continued)

| Drug (brand name)                       | Sponsor             | Properties                                                        | Indication                                                                                   | Approval date | Review |
|-----------------------------------------|---------------------|-------------------------------------------------------------------|----------------------------------------------------------------------------------------------|---------------|--------|
| 2019 New molecular entities = 8         |                     |                                                                   |                                                                                              |               |        |
| 1 Erdafitinib (Balversa)                | Janssen Biotech     | Fibroblast growth factor receptor (FGFR) inhibitor                | Bladder cancer                                                                               | 04/12/2019    | P      |
| 2 Alpelisib (Piqray)                    | Novartis            | Phosphatidylinositol 3-kinase $\alpha$ (PI3K $\alpha$ ) inhibitor | Breast cancer                                                                                | 05/24/2019    | P      |
| 3 Selinexor (Xpovio)                    | Karyopharm Theraps  | Exportin 1 (XPO1) inhibitor                                       | Multiple myeloma                                                                             | 07/03/2019    | P, O   |
| 4 Darolutamide (Nubeqa)                 | Bayer               | Androgen receptor inhibitor                                       | Prostate cancer                                                                              | 07/30/2019    | P      |
| 5 Pexidartinib HCl (Turalio)            | Daiichi Sankyo      | CSF1R, KIT, and FLT3 inhibitor                                    | Tenosynovial giant cell tumor                                                                | 08/02/2019    | P, O   |
| 6 Entrectinib (Rozytrek)                | Genentech           | Multi-target TKI (TRKs, ROS1, and ALK)                            | NTRK fusion- positive solid tumors and ROS1- positive NSCLC                                  | 08/15/2019    | P, O   |
| 7 Gallium dotatoc Ga-68                 | UIHC PET Imaging    | <sup>68</sup> Ga labelled radioactive diagnostic agent            | Localization of somatostatin receptor-positive neuroendocrine tumors                         | 08/21/2019    | S, O   |
| 8 Zanubrutinib (Brukinsa)               | BeiGene             | Bruton's tyrosine kinase (BTK) inhibitor                          | Mantle cell lymphoma                                                                         | 11/14/2019    | P, O   |
| 2019 Biologics license applications = 3 |                     |                                                                   |                                                                                              |               |        |
| 1 Polatuzumab vedotin (Polivy)          | Genentech           | CD79b-directed antibody-drug conjugate (ADC)                      | Diffuse large B-cell lymphoma                                                                | 06/10/2019    | P, O   |
| 2 Enfortumab vedotin (Padcev)           | Astellas            | Nectin-4-directed antibody-drug conjugate (ADC)                   | Urothelial carcinoma                                                                         | 12/18/2019    | P      |
| 3 Trastuzumab deruxtecan (Enhertu)      | Daiichi Sankyo      | HER2-directed antibody-drug conjugate (ADC)                       | HER2-positive breast cancer                                                                  | 12/20/2019    | P      |
| 2020 New molecular entities = 13        |                     |                                                                   |                                                                                              |               |        |
| 1 Avapritinib (Ayvakit)                 | Blueprint Medicines | PDGFR $\alpha$ , PDGFR $\alpha$ mutants, and KIT inhibitor        | Gastrointestinal stromal tumor (GIST) with <i>PDGFR<math>\alpha</math></i> exon 18 mutations | 01/09/2020    | P, O   |
| 2 Tazemetostat (Tazverik)               | Epizyme Inc         | Enhancer of Zeste Homolog 2 (EZH2) inhibitor                      | Epithelioid sarcoma                                                                          | 01/23/2020    | P, O   |
| 3 Tucatinib (Tukysa)                    | Seagen              | HER2 inhibitor                                                    | HER2-positive breast cancer                                                                  | 04/17/2020    | P, O   |
| 4 Pemigatinib (Pemazyre)                | Incyte              | Fibroblast growth factor receptor 1-3 (FGFR1-3) kinase inhibitor  | Advanced cholangiocarcinoma with <i>FGFR2</i> fusions/rearrangements                         | 04/17/2020    | P, O   |
| 5 Capmatinib HCl (Tabrecta)             | Novartis            | MET kinase inhibitor                                              | Non-small-cell lung cancer (NSCLC)                                                           | 05/06/2020    | P, O   |
| 6 Selpercatinib (Retevmo)               | Loxo Oncology       | RET kinase inhibitor                                              | RET fusion-positive NSCLC and thyroid cancer                                                 | 05/08/2020    | P, O   |
| 7 Ripretinib (Qinlock)                  | Deciphera           | PDGFR $\alpha$ , PDGFR $\alpha$ mutants, and KIT inhibitor        | Advanced gastrointestinal stromal tumor (GIST)                                               | 05/15/2020    | P, O   |
| 8 Fluoroestradiol F-18 (Cerianna)       | Zionexa             | <sup>18</sup> F labelled radioactive diagnostic agent             | Imaging, breast cancer                                                                       | 05/20/2020    | S      |
| 9 Lurbinectedin (Zepzelca)              | Jazz                | DNA alkylating drug                                               | Small-cell lung cancer                                                                       | 06/15/2020    | P, O   |
| 10 Copper dotatate Cu-64 (Detectnet)    | Radiomedix          | <sup>64</sup> Cu labelled somatostatin analog                     | Imaging, cancer                                                                              | 09/03/2020    | P, O   |
| 11 Pralsetinib (Gavreto)                | Genentech           | RET kinase inhibitor                                              | RET fusion-positive NSCLC                                                                    | 09/04/2020    | P, O   |
| 12 PSMA-11 Ga-68                        | UCLA                | <sup>68</sup> Ga labelled radioactive diagnostic agent            | Imaging, prostate cancer                                                                     | 12/01/2020    | S      |
| 13 Relugolix (Orgovyx)                  | Myovant Sciences    | GnRH receptor antagonist                                          | Prostate cancer                                                                              | 12/18/2020    | P      |
| 2020 Biologics license applications = 6 |                     |                                                                   |                                                                                              |               |        |
| 1 Isatuximab (Sarclisa)                 | Sanofi              | CD38-directed mAb                                                 | Multiple myeloma                                                                             | 03/02/2020    | S, O   |
| 2 Sacituzumab govitecan (Trodelvy)      | Immunomedics Inc    | Trophoblast cell surface antigen 2 (Trop2)-directed ADC           | Triple-negative breast cancer                                                                | 04/22/2020    | P      |
| 3 Tafasitamab (Monjuvi)                 | MorphoSys           | CD19-directed mAb                                                 | Diffuse large B-cell lymphoma (DLBCL)                                                        | 07/31/2020    | P, O   |
| 4 Belantamab mafodotin (Blenrep)        | GlaxoSmithKline     | B-cell maturation antigen (BCMA)-directed ADC                     | Multiple myeloma                                                                             | 08/05/2020    | P, O   |
| 5 Naxitamab (Danyelza)                  | Y-mAbs Therapeutics | GD2-directed mAb                                                  | High-risk neuroblastoma                                                                      | 11/25/2020    | P, O   |
| 6 Margetuximab (Margenza)               | MacroGenics         | HER2-directed mAb                                                 | HER2-positive breast cancer                                                                  | 12/16/2020    | S      |

## Supplementary data: Table 2 – FDA-approved cancer drugs (Continued)

| Drug (brand name)                             | Sponsor          | Properties                                                                       | Indication                                                                                                                      | Approval date | Review |
|-----------------------------------------------|------------------|----------------------------------------------------------------------------------|---------------------------------------------------------------------------------------------------------------------------------|---------------|--------|
| 2021 New molecular entities = 11              |                  |                                                                                  |                                                                                                                                 |               |        |
| 1 Tepotinib HCl (Tepmetko)                    | Emd Serono       | MET kinase inhibitor                                                             | Non-small-cell lung cancer (NSCLC)                                                                                              | 02/03/2021    | P, O   |
| 2 Ubralisib tosylate (Ukoniq)                 | TG Theraps       | PI3Kδ and CK1ε inhibitor                                                         | Relapsed or refractory marginal zone lymphoma (MZL), follicular lymphoma                                                        | 02/05/2021    | P, O   |
| 3 Trilaciclib 2HCl (Cosela)                   | G1 Therap        | CDK4/6 kinase inhibitor                                                          | Chemotherapy-induced myelosuppression                                                                                           | 02/12/2021    | P      |
| 4 Melphalan flufenamide HCl (Pepaxto)         | Oncopeptides     | Peptide-conjugated alkylating drug                                               | Multiple myeloma                                                                                                                | 02/26/2021    | P, O   |
| 5 Tivozanib HCl (Fotivda)                     | Aveo Pharms      | VEGFRs inhibitor                                                                 | Advanced renal cell carcinoma                                                                                                   | 03/10/2021    | S      |
| 6 Piflufolastat F-18 (Pylarify)               | Progenics        | <sup>18</sup> F labelled prostate-specific membrane antigen (PSMA) imaging agent | Prostate cancer imaging                                                                                                         | 05/26/2021    | P      |
| 7 Infigratinib phosphate (Truseltiq)          | Helsinn Hlthcare | FGFR1-3 inhibitor                                                                | Advanced cholangiocarcinoma with <i>FGFR2</i> fusions/rearrangements                                                            | 05/28/2021    | P, O   |
| 8 Sotorasib (Lumakras)                        | Amgen            | KRAS <sup>G12C</sup> inhibitor                                                   | KRAS <sup>G12C</sup> -mutated NSCLC                                                                                             | 05/28/2021    | P, O   |
| 9 Mobocertinib succinate (Exkivity)           | Takeda           | EGFR kinase inhibitor                                                            | EGFR exon 20-mutated NSCLC                                                                                                      | 09/15/2021    | P, O   |
| 10 Asciminib HCl (Scemblix)                   | Novartis         | ABL/BCR-ABL1 kinase inhibitor                                                    | Philadelphia chromosome-positive chronic myeloid leukemia (Ph+ CML)                                                             | 10/29/2021    | P, O   |
| 11 Pafolacianine sodium (Cytalux)             | On Target Labs   | Fluorescent folate receptor α (FRα) imaging agent                                | Ovarian cancer imaging                                                                                                          | 11/29/2021    | P, O   |
| 2021 Biologics license applications = 5       |                  |                                                                                  |                                                                                                                                 |               |        |
| 1 Dostarlimab (Jemperli)                      | GlaxoSmithKline  | PD1-directed mAb                                                                 | Endometrial cancer                                                                                                              | 04/22/2021    | P      |
| 2 Loncastuximab tesirine (Zynlonta)           | ADC Therapeutics | CD19-directed ADC                                                                | B-cell lymphoma                                                                                                                 | 04/23/2021    | P, O   |
| 3 Amivantamab (Rybrevant)                     | Janssen Biotech  | EGFR- and MET-bispecific antibody                                                | EGFR exon 20-mutated NSCLC                                                                                                      | 05/21/2021    | P      |
| 4 Asparaginase erwinia chrysanthemii (Rylaze) | Jazz             | Recombinant asparagine-specific enzyme                                           | Acute lymphoblastic leukaemia (ALL), and lymphoblastic lymphoma (LBL), in patients allergic to <i>E. coli</i> -derived products | 06/30/2021    | S, O   |
| 5 Tisotumab vedotin (Tivdak)                  | Seagen           | Tissue-factor-targeted ADC                                                       | Cervical cancer                                                                                                                 | 09/20/2021    | P, O   |

## Supplementary data: Table 3 – FDA-approved therapeutic drugs for solid tumors

| Drug (brand name)                         | Sponsor              | Properties                                          | Indication                                                                                    | Approval date | Review |
|-------------------------------------------|----------------------|-----------------------------------------------------|-----------------------------------------------------------------------------------------------|---------------|--------|
| <b>Therapeutic drugs for lung cancers</b> |                      |                                                     |                                                                                               |               |        |
| 1 Vinorelbine tartrate (Navelbine)        | Pierre Fabre         | Microtubule-destabilizing agent                     | Non-small-cell lung cancer (NSCLC)                                                            | 12/23/1994    | P      |
| 2 Gefitinib (Iressa)                      | AstraZeneca          | EGFR kinase inhibitor                               | Non-small-cell lung cancer (NSCLC)                                                            | 05/05/2003    | P      |
| 3 Erlotinib HCl (Tarceva)                 | OSI Pharms           | EGFR inhibitor                                      | Non-small-cell lung cancer (NSCLC)                                                            | 11/18/2004    | P      |
| 4 Crizotinib (Xalkori)                    | Merck & Co           | Multi-target TKI (ALK, ROS1, and MET)               | ALK-positive advanced or metastatic NSCLC                                                     | 08/26/2011    | P, O   |
| 5 Afatinib dimaleate (Gilotrif)           | Boehringer Ingelheim | EGFR, HER2, and HER4 inhibitor                      | Metastatic NSCLC with <i>EGFR</i> exon 19 deletions or exon 21 (L858R) substitution mutations | 07/12/2013    | P, O   |
| 6 Ceritinib (Zykadia)                     | Novartis             | Multi-target TKI (ALK, IGF1R, INSR, and ROS1)       | ALK-positive metastatic NSCLC                                                                 | 04/29/2014    | P, O   |
| 7 Osimertinib mesylate (Tagrisso)         | AstraZeneca          | EGFR inhibitor                                      | NSCLC with <i>EGFR</i> <sup>T790M</sup> mutations                                             | 11/13/2015    | P, O   |
| 8 Necitumumab (Portrazza)                 | Eli Lilly & Co       | EGFR-directed mAb                                   | Non-small-cell lung cancer (NSCLC)                                                            | 11/24/2015    | S, O   |
| 9 Alectinib HCl (Alecensa)                | Roche                | ALK inhibitor                                       | Non-small-cell lung cancer (NSCLC)                                                            | 12/11/2015    | P, O   |
| 10 Brigatinib (Alunbrig)                  | Takeda               | Multi-target TKI (ALK, EGFR, IGF1R, FLT3, and ROS1) | ALK-positive NSCLC                                                                            | 04/28/2017    | P, O   |
| 11 Dacomitinib (Vizimpro)                 | Pfizer               | EGFR inhibitor                                      | <i>EGFR</i> -mutated NSCLC                                                                    | 09/27/2018    | P, O   |
| 12 Lorlatinib (Lorbrena)                  | Pfizer               | Multi-target TKI (ALK and ROS1)                     | ALK-positive NSCLC                                                                            | 11/02/2018    | P, O   |
| 13 Entrectinib (Rozlytrek)                | Genentech            | Multi-target TKI (TRKs, ROS1, and ALK)              | NTRK fusion- positive solid tumors and ROS1-positive NSCLC                                    | 08/15/2019    | P, O   |
| 14 Capmatinib HCl (Tabrecta)              | Novartis             | MET kinase inhibitor                                | Non-small-cell lung cancer (NSCLC)                                                            | 05/06/2020    | P, O   |
| 15 Selpercatinib (Retevmo)                | Loxo Oncology        | RET kinase inhibitor                                | RET fusion-positive NSCLC and thyroid cancer                                                  | 05/08/2020    | P, O   |
| 16 Pralsetinib (Gavreto)                  | Genentech            | RET kinase inhibitor                                | RET fusion-positive NSCLC                                                                     | 09/04/2020    | P, O   |
| 17 Tepotinib HCl (Tepmetko)               | Emd Serono           | MET kinase inhibitor                                | Non-small-cell lung cancer (NSCLC)                                                            | 02/03/2021    | P, O   |
| 18 Amivantamab (Rybrevant)                | Janssen Biotech      | EGFR- and MET-bispecific antibody                   | <i>EGFR</i> exon 20-mutated NSCLC                                                             | 05/21/2021    | P      |
| 19 Sotorasib (Lumakras)                   | Amgen                | KRAS <sup>G12C</sup> inhibitor                      | KRAS <sup>G12C</sup> -mutated NSCLC                                                           | 05/28/2021    | P, O   |
| 20 Mobocertinib succinate (Exkivity)      | Takeda               | EGFR kinase inhibitor                               | <i>EGFR</i> exon 20-mutated NSCLC                                                             | 09/15/2021    | P, O   |
| 21 Topotecan HCl (Hycamtin)               | Novartis             | DNA topoisomerases inhibitor                        | Relapsed small cell lung cancer                                                               | 05/28/1996    | P      |
| 22 Lurbinectedin (Zepzelca)               | Jazz                 | DNA alkylating drug                                 | Small-cell lung cancer                                                                        | 06/15/2020    | P, O   |

## Supplementary data: Table 3 – FDA-approved therapeutic drugs for solid tumors (Continued)

| Drug (brand name)                           | Sponsor          | Properties                                                        | Indication                                                         | Approval date | Review |
|---------------------------------------------|------------------|-------------------------------------------------------------------|--------------------------------------------------------------------|---------------|--------|
| <b>Therapeutic drugs for breast cancers</b> |                  |                                                                   |                                                                    |               |        |
| 1 Anastrozole (Arimidex)                    | Ani Pharms       | Aromatase inhibitor                                               | Advanced breast cancer in post-menopausal women                    | 12/27/1995    | S      |
| 2 Docetaxel (Taxotere)                      | Sanofi           | Microtubule-stabilizing agent                                     | Locally advanced or metastatic breast cancer                       | 05/14/1996    | P      |
| 3 Toremifene citrate (Fareston)             | Kyowa kirin      | Estrogen receptor (ER) inhibitor                                  | ER-positive metastatic breast cancer                               | 05/29/1997    | S, O   |
| 4 Letrozole (Femara)                        | Novartis         | Aromatase inhibitor                                               | Advanced breast cancer                                             | 07/25/1997    | S      |
| 5 Capecitabine (Xeloda)                     | Roche            | Prodrug of 5-FU                                                   | Metastatic breast cancer                                           | 04/30/1998    | P      |
| 6 Trastuzumab (Herceptin)                   | Genentech        | HER2-directed mAb                                                 | HER2-positive breast cancer                                        | 09/25/1998    | P      |
| 7 Epirubicin HCl (Ellence)                  | Pfizer           | DNA topoisomerase II inhibitor                                    | Primary breast cancer with axillary node tumor involvement         | 09/15/1999    | P, O   |
| 8 Exemestane (Aromasin)                     | Pfizer           | Aromatase inhibitor                                               | ER-positive early breast cancer                                    | 10/21/1999    | S, O   |
| 9 Fulvestrant (Faslodex)                    | AstraZeneca      | Estrogen receptor antagonist                                      | HR-positive metastatic breast cancer                               | 04/25/2002    | S      |
| 10 Lapatinib Ditosylate (Tykerb)            | Novartis         | HER2 and EGFR inhibitor                                           | Advanced or metastatic breast cancer (HER2-positive)               | 03/13/2007    | P      |
| 11 Ixabepilone (Ixempra)                    | R-Pharm US       | Microtubule-stabilizing agent                                     | Advanced or metastatic breast cancer                               | 10/16/2007    | P      |
| 12 Eribulin mesylate (Halaven)              | Eisai            | Microtubule-destabilizing agent                                   | Breast cancer                                                      | 11/15/2010    | P      |
| 13 Pertuzumab (Perjeta)                     | Genentech        | HER2-directed mAb                                                 | HER2-positive metastatic breast cancer                             | 06/08/2012    | P      |
| 14 Ado-trastuzumab emtansine (Kadcyla)      | Genentech        | HER2-directed ADC                                                 | HER2-positive metastatic breast cancer                             | 02/22/2013    | P      |
| 15 Palbociclib (Ibrance)                    | Pfizer           | Cyclin-dependent kinase 4/6 (CDK4/6) inhibitor                    | HER2-negative and HR-positive advanced or metastatic breast cancer | 02/03/2015    | P      |
| 16 Ribociclib succinate (Kisqali)           | Novartis         | CDK4/6 inhibitor                                                  | HR-positive, HER2-negative breast cancer                           | 03/13/2017    | P      |
| 17 Neratinib maleate (Nerlynx)              | Puma Biotech     | EGFR, HER2, and HER4 inhibitor                                    | HER2-overexpressed breast cancer                                   | 07/17/2017    | S      |
| 18 Abemaciclib (Verzenio)                   | Eli Lilly & Co   | CDK4/6 inhibitor                                                  | HR-positive, HER2-negative breast cancer                           | 09/28/2017    | P      |
| 19 Talazoparib tosylate (Talzenna)          | Pfizer           | Poly-ADP ribose polymerase (PARP) inhibitor                       | BRCA-mutated HER2-negative breast cancer                           | 10/16/2018    | P      |
| 20 Alpelisib (Piqray)                       | Novartis         | Phosphatidylinositol 3-kinase $\alpha$ (PI3K $\alpha$ ) inhibitor | Breast cancer                                                      | 05/24/2019    | P      |
| 21 Trastuzumab deruxtecan (Enhertu)         | Daiichi Sankyo   | HER2-directed antibody-drug conjugate (ADC)                       | HER2-positive breast cancer                                        | 12/20/2019    | P      |
| 22 Tucatinib (Tukysa)                       | Seagen           | HER2 inhibitor                                                    | HER2-positive breast cancer                                        | 04/17/2020    | P, O   |
| 23 Sacituzumab govitecan (Trodelvy)         | Immunomedics Inc | Trophoblast cell surface antigen 2 (Trop2)-directed ADC           | Triple-negative breast cancer                                      | 04/22/2020    | P      |
| 24 Margetuximab (Margenza)                  | MacroGenics      | HER2-directed mAb                                                 | HER2-positive breast cancer                                        | 12/16/2020    | S      |

| Drug (brand name)                                | Sponsor         | Properties                                  | Indication                                                      | Approval date | Review |
|--------------------------------------------------|-----------------|---------------------------------------------|-----------------------------------------------------------------|---------------|--------|
| <b>Therapeutic drugs for gynecologic cancers</b> |                 |                                             |                                                                 |               |        |
| 1 Paclitaxel (Taxol)                             | HQ Spclt Pharma | Microtubule-stabilizing agent               | Advanced ovarian cancer                                         | 12/29/1992    | P, O   |
| 2 Olaparib (Lynparza)                            | AstraZeneca     | PARP inhibitor                              | Advanced BRCA-mutated ovarian cancer                            | 12/19/2014    | P, O   |
| 3 Rucaparib camsylate (Rubraca)                  | Clovis Oncology | PARP inhibitor                              | BRCA-positive ovarian cancer                                    | 12/19/2016    | P, O   |
| 4 Niraparib tosylate (Zejula)                    | GlaxoSmithKline | Poly-ADP ribose polymerase (PARP) inhibitor | Epithelial ovarian, fallopian tube or primary peritoneal cancer | 03/27/2017    | P, O   |
| 5 Dostarlimab (Jemperli)                         | GlaxoSmithKline | PD1-directed mAb                            | Endometrial cancer                                              | 04/22/2021    | P      |
| 6 Tisotumab vedotin (Tivdak)                     | Seagen          | Tissue-factor-targeted ADC                  | Cervical cancer                                                 | 09/20/2021    | P, O   |

## Supplementary data: Table 3 – FDA-approved therapeutic drugs for solid tumors (Continued)

| Drug (brand name)                                     | Sponsor             | Properties                                                                                       | Indication                                                                          | Approval date | Review |
|-------------------------------------------------------|---------------------|--------------------------------------------------------------------------------------------------|-------------------------------------------------------------------------------------|---------------|--------|
| <b>Therapeutic drugs for gastrointestinal cancers</b> |                     |                                                                                                  |                                                                                     |               |        |
| 1 Porfimer sodium (Photofrin)                         | Pinnacle Biologics  | A photosensitizer used for photodynamic therapy                                                  | Advanced esophageal cancer                                                          | 12/27/1995    | P, O   |
| 2 Ramucirumab (Cyramza)                               | Eli Lilly & Co      | VEGFR2-targeted mAb                                                                              | Gastric cancer                                                                      | 04/21/2014    | P, O   |
| 3 Sunitinib malate (Sutent)                           | CPPI CV             | Multi-target TKI (VEGFRs, PDGFR $\alpha/\beta$ , CSF1R, KIT, and FLT3)                           | Imatinib-resistant gastrointestinal stromal tumor and advanced renal cell carcinoma | 01/26/2006    | P      |
| 4 Avapritinib (Ayvakit)                               | Blueprint Medicines | PDGFR $\alpha$ , PDGFR $\alpha$ mutants, and KIT inhibitor                                       | Gastrointestinal stromal tumor (GIST) with <i>PDGFRA</i> exon 18 mutations          | 01/09/2020    | P, O   |
| 5 Ripretinib (Qinlock)                                | Deciphera           | PDGFR $\alpha$ , PDGFR $\alpha$ mutants, and KIT inhibitor                                       | Advanced gastrointestinal stromal tumor (GIST)                                      | 05/15/2020    | P, O   |
| 6 Lutetium dotatate Lu-177 (Lutathera)                | AAA USA Inc         | Somatostatin receptor-targeted radiopharmaceutical                                               | Gastroenteropancreatic neuroendocrine tumors (GEP-NETs)                             | 01/26/2018    | P, O   |
| 7 Pemigatinib (Pemazyre)                              | Incyte              | Fibroblast growth factor receptor 1-3 (FGFR1-3) kinase inhibitor                                 | Advanced cholangiocarcinoma with <i>FGFR2</i> fusions/rearrangements                | 04/17/2020    | P, O   |
| 8 Infigratinib phosphate (Truseltiq)                  | Helsinn Healthcare  | FGFR1-3 inhibitor                                                                                | Advanced cholangiocarcinoma with <i>FGFR2</i> fusions/rearrangements                | 05/28/2021    | P, O   |
| 9 Gemcitabine HCl (Gemzar)                            | Eli Lilly           | DNA synthesis inhibitor                                                                          | Locally advanced or metastatic pancreatic cancer                                    | 05/15/1996    | P      |
| 10 Irinotecan HCl (Camptosar)                         | Pfizer              | Topoisomerase I inhibitor                                                                        | Metastatic colorectal cancer                                                        | 06/14/1996    | P      |
| 11 Oxaliplatin (Eloxatin)                             | Sanofi              | Organoplatinum alkylating agent, increases tumor response rate to chemotherapy                   | Colorectal cancer (in combination with 5-FU and leucovorin)                         | 08/09/2002    | P      |
| 12 Cetuximab (Erbix)                                  | ImClone             | EGFR-directed mAb                                                                                | Colorectal cancer                                                                   | 02/12/2004    | N/A    |
| 13 Bevacizumab (Avastin)                              | Genentech           | VEGF-A-directed mAb                                                                              | Colorectal cancer                                                                   | 02/26/2004    | O      |
| 14 Panitumumab (Vectibix)                             | Amgen               | EGFR-directed mAb                                                                                | EGFR-expressing metastatic colorectal carcinoma                                     | 09/27/2006    | N/A    |
| 15 Ziv-aflibercept (Zaltrap)                          | Sanofi              | Soluble receptor decoy that binds VEGF-A, VEGF-B, and PlGF                                       | Metastatic colorectal cancer                                                        | 08/03/2012    | P      |
| 16 Regorafenib (Stivarga)                             | Bayer               | Multi-target TKI (RET, VEGFRs, KIT, PDGFR $\alpha/\beta$ , FGFR1/2, RAF1, BRAFWT, and BRAFV600E) | Metastatic colorectal cancer                                                        | 09/27/2012    | P      |
| 17 Tipiracil HCl; Trifluridine (Lonsurf)              | Taiho Oncology      | Thymidine phosphorylase inhibitor plus a nucleoside metabolic inhibitor                          | Colorectal cancer                                                                   | 09/22/2015    | S      |

## Supplementary data: Table 3 – FDA-approved therapeutic drugs for solid tumors (Continued)

| Drug (brand name)                             | Sponsor             | Properties                                          | Indication                                      | Approval date | Review |
|-----------------------------------------------|---------------------|-----------------------------------------------------|-------------------------------------------------|---------------|--------|
| <b>Therapeutic drugs for prostate cancers</b> |                     |                                                     |                                                 |               |        |
| 1 Bicalutamide (Casodex)                      | Ani Pharms          | Androgen receptor antagonist                        | Advanced prostate cancer                        | 10/04/1995    | S      |
| 2 Nilutamide (Nilandron)                      | Concordia           | Androgen receptor antagonist                        | Metastatic prostate cancer                      | 09/19/1996    | S      |
| 3 Triptorelin pamoate (Trelstar)              | Verity              | GnRH agonist                                        | Advanced prostate cancer                        | 06/15/2000    | S      |
| 4 Abarelix (Plenaxis)                         | Speciality European | GnRH receptor antagonist                            | Advanced prostate cancer                        | 11/25/2003    | P      |
| 5 Degarelix acetate (Firmagon)                | Ferring             | GnRH receptor antagonist                            | Advanced prostate cancer                        | 12/24/2008    | S      |
| 6 Cabazitaxel (Jevtana kit)                   | Sanofi              | Microtubule-stabilizing agent                       | Prostate cancer                                 | 06/17/2010    | P      |
| 7 Abiraterone acetate (Zytiga)                | Janssen Biotech     | CYP17A1 inhibitor                                   | Metastatic castration-resistant prostate cancer | 04/28/2011    | P      |
| 8 Enzalutamide (Xtandi)                       | Astellas            | Androgen receptor inhibitor                         | Metastatic castration-resistant prostate cancer | 08/31/2012    | P      |
| 9 Radium Ra-223 dichloride (Xofigo)           | Bayer               | $\alpha$ -particle-emitting radioactive therapeutic | Castration-resistant prostate cancer            | 05/15/2013    | P      |
| 10 Apalutamide (Erleada)                      | Janssen Biotech     | Androgen receptor inhibitor                         | Prostate cancer                                 | 02/14/2018    | P      |
| 11 Darolutamide (Nubeqa)                      | Bayer               | Androgen receptor inhibitor                         | Prostate cancer                                 | 07/30/2019    | P      |
| 12 Relugolix (Orgovyx)                        | Myovant Sciences    | GnRH receptor antagonist                            | Prostate cancer                                 | 12/18/2020    | P      |

| Drug (brand name)                             | Sponsor         | Properties                                                             | Indication                                   | Approval date | Review |
|-----------------------------------------------|-----------------|------------------------------------------------------------------------|----------------------------------------------|---------------|--------|
| <b>Therapeutic drugs for urologic cancers</b> |                 |                                                                        |                                              |               |        |
| 1 Aldesleukin (Proleukin)                     | Chiron          | Recombinant human interleukin-2                                        | Metastatic renal cell carcinoma              | 05/05/1992    | O      |
| 2 Sorafenib tosylate (Nexavar)                | Bayer           | Multi-target TKI (VEGFR2/3, PDGFR $\beta$ , FLT3, KIT, RAF1, and BRAF) | Advanced renal cell carcinoma                | 12/01/2005    | P, O   |
| 3 Temsirolimus (Torisel)                      | Merck & Co      | Mammalian target of rapamycin (mTOR) inhibitor                         | Advanced renal cell carcinoma                | 05/30/2007    | P, O   |
| 4 Everolimus (Afinitor)                       | Novartis        | Mammalian target of rapamycin (mTOR) inhibitor                         | Advanced renal cell carcinoma                | 03/30/2009    | P      |
| 5 Pazopanib HCl (Votrient)                    | Novartis        | Multi-target TKI (VEGFRs, PDGFR $\alpha/\beta$ , FGFR1/2, KIT)         | Advanced renal cell carcinoma                | 10/19/2009    | S      |
| 6 Axitinib (Inlyta)                           | Pfizer          | VEGFRs inhibitor                                                       | Advanced renal cell carcinoma                | 01/27/2012    | S      |
| 7 Tivozanib HCl (Fotivda)                     | Aveo Pharms     | VEGFRs inhibitor                                                       | Advanced renal cell carcinoma                | 03/10/2021    | S      |
| 8 Atezolizumab (Tecentriq)                    | Genentech       | PDL1-directed mAb                                                      | Advanced or metastatic urothelial carcinoma  | 05/18/2016    | P      |
| 9 Durvalumab (Imfinzi)                        | AstraZeneca     | PDL1-directed mAb                                                      | Urothelial carcinoma                         | 05/01/2017    | P      |
| 10 Enfortumab vedotin (Padcev)                | Astellas        | Nectin-4-directed antibody-drug conjugate (ADC)                        | Urothelial carcinoma                         | 12/18/2019    | P      |
| 11 Valrubicin (Valstar)                       | Endo Pharm      | A semisynthetic analog of anthracycline doxorubicin                    | BCG-refractory CIS of urinary bladder cancer | 09/25/1998    | P, O   |
| 12 Erdafitinib (Balversa)                     | Janssen Biotech | Fibroblast growth factor receptor (FGFR) inhibitor                     | Bladder cancer                               | 04/12/2019    | P      |

## Supplementary data: Table 3 – FDA-approved therapeutic drugs for solid tumors (Continued)

| Drug (brand name)                                                   | Sponsor                   | Properties                                                                                          | Indication                                                                                                                                | Approval date | Review |
|---------------------------------------------------------------------|---------------------------|-----------------------------------------------------------------------------------------------------|-------------------------------------------------------------------------------------------------------------------------------------------|---------------|--------|
| <b>Therapeutic drugs for melanoma and other skin cancers</b>        |                           |                                                                                                     |                                                                                                                                           |               |        |
| 1 Ipilimumab (Yervoy)                                               | Bristol-Myers Squibb      | Cytotoxic T-lymphocyte antigen 4 (CTLA-4)-directed mAb                                              | Unresectable or metastatic melanoma                                                                                                       | 03/25/2011    | P, O   |
| 2 Vemurafenib (Zelboraf)                                            | Roche                     | BRAF inhibitor                                                                                      | BRAF-positive unresectable or metastatic melanoma                                                                                         | 08/17/2011    | P, O   |
| 3 Dabrafenib mesylate (Tafinlar)                                    | Novartis                  | Kinase inhibitor with activity against BRAF <sup>V600E/D/K</sup> , wild-type BRAF and other kinases | Unresectable or metastatic melanoma with BRAF <sup>V600E</sup> mutation                                                                   | 05/29/2013    | S, O   |
| 4 Trametinib dimethyl sulfoxide (Mekinist)                          | Novartis                  | MEK1 and MEK2 kinase inhibitor                                                                      | Unresectable or metastatic melanoma with BRAF <sup>V600E</sup> mutation                                                                   | 05/29/2013    | S, O   |
| 5 Pembrolizumab (Keytruda)                                          | Merck & Co                | PD1-directed mAb                                                                                    | Metastatic melanoma                                                                                                                       | 09/04/2014    | P, O   |
| 6 Nivolumab (Opdivo)                                                | Bristol-Myers Squibb      | PD1-directed mAb                                                                                    | Unresectable or metastatic melanoma                                                                                                       | 12/22/2014    | P, O   |
| 7 Cobimetinib fumarate (Cotellic)                                   | Genentech                 | MEK inhibitor                                                                                       | Melanoma with BRAF <sup>V600E/K</sup> mutations                                                                                           | 11/10/2015    | P, O   |
| 8 Encorafenib (Braftovi)                                            | Array BioPharma           | BRAF inhibitor                                                                                      | BRAF-mutated melanoma                                                                                                                     | 06/27/2018    | S, O   |
| 9 Binimetinib (Mektovi)                                             | Array BioPharma           | MEK inhibitor                                                                                       | BRAF-mutated melanoma                                                                                                                     | 06/27/2018    | S, O   |
| 10 Vismodegib (Erivedge)                                            | Genentech                 | Smoothened (Hedgehog pathway) inhibitor                                                             | Metastatic or locally advanced basal cell carcinoma                                                                                       | 01/30/2012    | P      |
| 11 Sonidegib phosphate (Odomzo)                                     | Sun Pharma Global         | Smoothened inhibitor                                                                                | Basal cell carcinoma                                                                                                                      | 07/24/2015    | S      |
| 12 Avelumab (Bavencio)                                              | Emd Serono                | PDL1-directed mAb                                                                                   | Merkel cell carcinoma                                                                                                                     | 03/23/2017    | P, O   |
| 13 Cemiplimab (Libtayo)                                             | Regeneron Pharmaceuticals | Programmed death receptor-1 (PD1)-directed mAb                                                      | Metastatic or locally advanced cutaneous squamous cell carcinoma (CSCC)                                                                   | 09/28/2018    | P      |
| <b>Therapeutic drugs for thyroid cancers and other solid tumors</b> |                           |                                                                                                     |                                                                                                                                           |               |        |
| 1 Thyrotropin alfa (Thyrogen)                                       | Genzyme                   | Recombinant human thyroid stimulating hormone                                                       | Diagnostic testing for thyroid tissue remnants following radioiodine ablation, and alongside radioactive agents to destroy thyroid tissue | 11/30/1998    | O      |
| 2 Vandetanib (Caprelsa)                                             | Genzyme                   | Multi-target TKI (VEGFR2/3, EGFR, and RET)                                                          | Unresectable or metastatic medullary thyroid cancer                                                                                       | 04/06/2011    | P, O   |
| 3 Cabozantinib S-malate (Cometriq)                                  | Exelixis                  | Multi-target TKI (VEGFRs, MET, RET, FLT3, KIT, TIE2, and AXL)                                       | Progressive, metastatic medullary thyroid cancer                                                                                          | 11/29/2012    | P, O   |
| 4 Lenvatinib mesylate (Lenvima)                                     | Eisai                     | Multi-target TKI (VEGFRs, FGFRs, PDGFR $\alpha$ , RET, and KIT)                                     | Thyroid cancer                                                                                                                            | 02/13/2015    | P, O   |
| 5 Alitretinoin (Panretin)                                           | Concordia                 | 9-cis-retinoic acid, a form of vitamin A                                                            | AIDS-related Kaposi's sarcoma                                                                                                             | 02/02/1999    | P, O   |
| 6 Temozolomide (Temodar)                                            | Merck & Co                | DNA alkylating agent                                                                                | Glioblastoma                                                                                                                              | 08/11/1999    | P, O   |
| 7 Dinutuximab (Unituxin)                                            | United Therap             | GD2-directed mAb                                                                                    | High-risk neuroblastoma                                                                                                                   | 03/10/2015    | P, O   |
| 8 Naxitamab (Danyelza)                                              | Y-mAbs Therapeutics       | GD2-directed mAb                                                                                    | High-risk neuroblastoma                                                                                                                   | 11/25/2020    | P, O   |
| 9 Pemetrexed disodium (Alimta)                                      | Eli Lilly                 | Folate analog                                                                                       | Malignant pleural mesothelioma                                                                                                            | 02/04/2004    | P, O   |
| 10 Trabectedin (Yondelis)                                           | Janssen Prods             | Alkylating drug, interacts with the minor groove of DNA                                             | Liposarcoma or leiomyosarcoma                                                                                                             | 10/23/2015    | P, O   |
| 11 Olaratumab (Lartruvo)                                            | Eli Lilly & Co            | PDGFR $\alpha$ -directed mAb                                                                        | Soft tissue sarcoma                                                                                                                       | 10/19/2016    | P, O   |
| 12 Larotrectinib sulfate (Vitrakvi)                                 | Bayer                     | TRKs inhibitor                                                                                      | NTRK-positive solid cancers                                                                                                               | 11/26/2018    | P, O   |
| 13 Pexidartinib HCl (Turalio)                                       | Daiichi Sankyo            | CSF1R, KIT, and FLT3 inhibitor                                                                      | Tenosynovial giant cell tumor                                                                                                             | 08/02/2019    | P, O   |
| 14 Tazemetostat (Tazverik)                                          | Epizyme Inc               | Enhancer of Zeste Homolog 2 (EZH2) inhibitor                                                        | Epithelioid sarcoma                                                                                                                       | 01/23/2020    | P, O   |

## Supplementary data: Table 4 – ICBs: first approval and primary indications in the USA and China

| Drug (brand name)                                               | Sponsor                             | Target      | IgG type       | Primary indication                                                                             | Approval date |
|-----------------------------------------------------------------|-------------------------------------|-------------|----------------|------------------------------------------------------------------------------------------------|---------------|
| <b>Food and Drug Administration (USA), N = 9</b>                |                                     |             |                |                                                                                                |               |
| 1 Ipilimumab (Yervoy)                                           | Bristol-Myers Squibb                | CTLA-4      | IgG1 $\kappa$  | Malignant melanoma                                                                             | 03/25/2011    |
| 2 Pembrolizumab (Keytruda)                                      | Merck                               | PD-1        | IgG4 $\kappa$  | Advanced, unresectable or metastatic melanoma                                                  | 09/04/2014    |
| 3 Nivolumab (Opdivo)                                            | Bristol-Myers Squibb                | PD-1        | IgG4 $\kappa$  | Unresectable or metastatic melanoma                                                            | 12/22/2014    |
| 4 Atezolizumab (Tecentriq)                                      | Genentech                           | PD-L1       | IgG1 $\kappa$  | Urothelial carcinoma                                                                           | 05/18/2016    |
| 5 Avelumab (Bavencio)                                           | Emd Serono                          | PD-L1       | IgG1 $\lambda$ | Metastatic Merkel cell carcinoma                                                               | 03/23/2017    |
| 6 Durvalumab (Imfinzi)                                          | AstraZeneca                         | PD-L1       | IgG1 $\kappa$  | Locally advanced or metastatic urothelial carcinoma                                            | 05/01/2017    |
| 7 Cemiplimab (Libtayo)                                          | Regeneron                           | PD-1        | IgG4 $\kappa$  | Locally advanced or metastatic Cutaneous squamous cell carcinoma                               | 09/28/2018    |
| 8 Dostarlimab (Jemperli)                                        | GlaxoSmithKline                     | PD-1        | IgG4 $\kappa$  | Mismatch repair deficient, recurrent or advanced endometrial cancer                            | 04/22/2021    |
| 9 Nivolumab/Relatlimab (Opdualag)                               | Bristol-Myers Squibb                | PD-1/LAG-3  | IgG4 $\kappa$  | Unresectable or metastatic melanoma                                                            | 03/18/2022    |
| <b>National Medical Products Administration (China), N = 11</b> |                                     |             |                |                                                                                                |               |
| 10 Toripalimab (Tuoyi)                                          | Junshi Bio                          | PD-1        | IgG4           | Unresectable or metastatic melanoma                                                            | 12/17/2018    |
| 11 Sintilimab (Tyvyt)                                           | Innovent Bio, Eli Lilly             | PD-1        | IgG4           | Relapsed or refractory classical Hodgkin's lymphoma                                            | 12/27/2018    |
| 12 Camrelizumab (艾利可)                                           | Hengrui Med                         | PD-1        | IgG4 $\kappa$  | Relapsed or refractory classical Hodgkin's lymphoma                                            | 05/31/2019    |
| 13 Tislelizumab (百泽安)                                           | BeiGene                             | PD-1        | IgG4           | Relapsed or refractory classical Hodgkin's lymphoma                                            | 12/26/2019    |
| 14 Penpulimab (安尼可)                                             | Akeso Bio, Chia Tai Tianqing        | PD-1        | IgG1           | Relapsed or refractory classical Hodgkin's lymphoma                                            | 08/05/2021    |
| 15 Zimberelimab (誉妥)                                            | Gloria Bio, Arcus Bio, Taiho Pharma | PD-1        | IgG4           | Relapsed or refractory classical Hodgkin's lymphoma                                            | 08/25/2021    |
| 16 Envafohimab (恩维达)                                            | Alphamab Oncology                   | PD-L1       | Nanobody       | Advanced mismatch repair deficient solid tumors                                                | 11/24/2021    |
| 17 Sugemalimab (Cejemly)                                        | CStone Pharma                       | PD-L1       | IgG4           | <i>EGFR</i> <sup>Mut</sup> and <i>ALK</i> <sup>Ne9</sup> metastatic non-small cell lung cancer | 12/21/2021    |
| 18 Serplulimab (汉斯状)                                            | Henlius Bio                         | PD-1        | IgG4           | Advanced, unresectable or metastatic microsatellite instability-high solid tumors              | 03/25/2022    |
| 19 Cadonilimab (开坦尼)                                            | Akeso Bio                           | PD-1/CTLA-4 | IgG1           | Relapsed or metastatic cervical cancer                                                         | 06/29/2022    |
| 20 Pucotenimab (普佑恒)                                            | Lepu Bio                            | PD-1        | IgG4           | Microsatellite instability-high solid tumors                                                   | 07/22/2022    |



## Reference

1. Kaitin KI, Manocchia M, Seibring M, Lasagna L: **The new drug approvals of 1990, 1991, and 1992: trends in drug development.** *J Clin Pharmacol* 1994, **34**(2):120-127.
2. Beary JF, Robert Eaton C, Copmann TL, Wierenga DE: **U.S. drug and biologic product approvals during 1993.** *Drug Development Research* 1994, **32**(3):127-133.
3. Beary JF, Duchaine CM, Rhein RW: **U.S. drug and biologic approvals in 1994-1995.** *Drug Development Research* 1996, **37**(4):197-207.
4. Beary JF, Robillard LE, Woollett GR, Siegfried JD, White TX, Shriver DA: **U.S. drug and biologic approvals in 1996.** *Drug Development Research* 1997, **40**(4):275-291.
5. Beary JF, Siegfried JD, Tavares R: **US drug and biologic approvals in 1997.** *Drug Development Research* 1998, **44**(2-3):114-129.
6. Spilker B, FitzSimmons S, Horan M: **US drug and biologic approvals in 1998.** *Drug Development Research* 1999, **48**(4):139-153.
7. Kaitin KI, Cairns C: **The New Drug Approvals of 1999, 2000, and 2001: Drug Development Trends a Decade after Passage of the Prescription Drug User Fee Act of 1992.** *Drug Information Journal* 2003, **37**(4):357-371.
8. Frantz S, Smith A: **New drug approvals for 2002.** *Nat Rev Drug Discov* 2003, **2**(2):95-96.
9. Frantz S: **2003 approvals: a year of innovation and upward trends.** *Nat Rev Drug Discov* 2004, **3**(2):103-105.
10. Frantz S: **2004 approvals: the demise of the blockbuster?** *Nat Rev Drug Discov* 2005, **4**(2):93-94.
11. Frantz S: **2005 approvals: Safety first.** *Nature Reviews Drug Discovery* 2006, **5**(2):92-93.
12. Owens J: **2006 drug approvals: finding the niche.** *Nat Rev Drug Discov* 2007, **6**(2):99-101.
13. Hughes B: **2007 FDA drug approvals: a year of flux.** *Nat Rev Drug Discov* 2008, **7**(2):107-109.
14. Hughes B: **2008 FDA drug approvals.** *Nat Rev Drug Discov* 2009, **8**(2):93-96.
15. Hughes B: **2009 FDA drug approvals.** *Nat Rev Drug Discov* 2010, **9**(2):89-92.
16. Mullard A: **2010 FDA drug approvals.** *Nat Rev Drug Discov* 2011, **10**(2):82-85.
17. Mullard A: **2011 FDA drug approvals.** *Nat Rev Drug Discov* 2012, **11**(2):91-94.
18. Mullard A: **2012 FDA drug approvals.** *Nat Rev Drug Discov* 2013, **12**(2):87-90.
19. Mullard A: **2013 FDA drug approvals.** *Nat Rev Drug Discov* 2014, **13**(2):85-89.
20. Mullard A: **2014 FDA drug approvals.** *Nat Rev Drug Discov* 2015, **14**(2):77-81.
21. Mullard A: **2015 FDA drug approvals.** *Nat Rev Drug Discov* 2016, **15**(2):73-76.
22. Mullard A: **2016 FDA drug approvals.** *Nat Rev Drug Discov* 2017, **16**(2):73-76.
23. Mullard A: **2017 FDA drug approvals.** *Nat Rev Drug Discov* 2018, **17**(2):81-85.
24. Mullard A: **2018 FDA drug approvals.** *Nat Rev Drug Discov* 2019, **18**(2):85-89.
25. Mullard A: **2019 FDA drug approvals.** *Nat Rev Drug Discov* 2020, **19**(2):79-84.
26. Mullard A: **2020 FDA drug approvals.** *Nat Rev Drug Discov* 2021, **20**(2):85-90.
27. Mullard A: **2021 FDA approvals.** *Nat Rev Drug Discov* 2022, **21**(2):83-88.
28. Cameron F, Whiteside G, Perry C: **Ipilimumab: first global approval.** *Drugs* 2011, **71**(8):1093-1104.

29. Poole RM: **Pembrolizumab: first global approval.** *Drugs* 2014, **74**(16):1973-1981.
30. Scott LJ: **Nivolumab: A Review in Advanced Melanoma.** *Drugs* 2015, **75**(12):1413-1424.
31. Markham A: **Atezolizumab: First Global Approval.** *Drugs* 2016, **76**(12):1227-1232.
32. Kim ES: **Avelumab: First Global Approval.** *Drugs* 2017, **77**(8):929-937.
33. Syed YY: **Durvalumab: First Global Approval.** *Drugs* 2017, **77**(12):1369-1376.
34. Markham A, Duggan S: **Cemiplimab: First Global Approval.** *Drugs* 2018, **78**(17):1841-1846.
35. Markham A: **Dostarlimab: First Approval.** *Drugs* 2021, **81**(10):1213-1219.
36. Paik J: **Nivolumab Plus Relatlimab: First Approval.** *Drugs* 2022, **82**(8):925-931.
37. Keam SJ: **Toripalimab: First Global Approval.** *Drugs* 2019, **79**(5):573-578.
38. Hoy SM: **Sintilimab: First Global Approval.** *Drugs* 2019, **79**(3):341-346.
39. Markham A, Keam SJ: **Camrelizumab: First Global Approval.** *Drugs* 2019, **79**(12):1355-1361.
40. Lee A, Keam SJ: **Tislelizumab: First Approval.** *Drugs* 2020, **80**(6):617-624.
41. Dhillon S: **Penpulimab: First Approval.** *Drugs* 2021, **81**(18):2159-2166.
42. Markham A: **Zimberelimab: First Approval.** *Drugs* 2021, **81**(17):2063-2068.
43. Markham A: **Envafolimab: First Approval.** *Drugs* 2022, **82**(2):235-240.
44. Dhillon S, Duggan S: **Sugemalimab: First Approval.** *Drugs* 2022, **82**(5):593-599.
45. Lee A: **Serplulimab: First Approval.** *Drugs* 2022, **82**(10):1137-1141.
46. Keam SJ: **Cadonilimab: First Approval.** *Drugs* 2022.
